# Supplementary material for: Iron Regulation in Clostridioides difficile
Source: Front Microbiol. 2018 Dec 24;9:3183. doi: 10.3389/fmicb.2018.03183 (PMC6311696; doi:10.3389/fmicb.2018.03183)
Supplement: Table S4 — Comparative proteome analysis of C. difficile wild type and the fur mutant grown at low and high iron conditions. For details, please consult the Section “Materials and Methods and “Results.” [file Table_4.XLSX]

## Sheet: Tabelle1
				Quantitative value (NAUC)					log2 FC		log2 FC
Gene name	Accession Number uniprot	Identified Proteins		Fur + iron	Fur - iron	WT + iron	WT - iron		Fur + iron vs. WT + iron	p(<0.05)	WT - iron vs. WT + iron	p(<0.05)
CD19990	Q187W1_PEPD6	Flavodoxin OS=Peptoclostridium difficile (strain 630) GN=fldX PE=4 SV=1	-	0.00453544	0.00741025		0.00447577		ON		ON
CD34730	ATPL_PEPD6	ATP synthase subunit c OS=Peptoclostridium difficile (strain 630) GN=atpE PE=3 SV=1	-	0.00170713	0.00233238		0.00182638		ON		ON
CD02790	Q18D22_PEPD6	Pyridoxamine 5'-phosphate oxidase family protein OS=Peptoclostridium difficile (strain 630) GN=CD02790 PE=4 SV=1	-	4.54837e-05	0.00174943		0.000830707		ON		ON
CD16490	Q186K5_PEPD6	ABC-type transport system, iron-family ATP-binding protein OS=Peptoclostridium difficile (strain 630) GN=CD16490 PE=4 SV=1	-	0.00123659	0.00136676		0.000764691		ON		ON
CD17110	Y1711_PEPD6	UPF0145 protein CD17110 OS=Peptoclostridium difficile (strain 630) GN=CD17110 PE=3 SV=1	-	0.000853425	0.000869782		0.00050299		ON		ON
CD28750	Q183W2_PEPD6	ABC-type transport system, ferrichrome-specific ATP-binding protein OS=Peptoclostridium difficile (strain 630) GN=fhuC PE=3 SV=1	-	0.000204263	0.000205788		7.94562e-05		ON		ON
CD18010	Q187B2_PEPD6	Putative membrane protein OS=Peptoclostridium difficile (strain 630) GN=CD18010 PE=4 SV=1	-	3.45947e-05	6.01396e-05		5.37497e-05		ON		ON
CD11690	Q18B28_PEPD6	Transcriptional regulator, GntR family OS=Peptoclostridium difficile (strain 630) GN=CD11690 PE=4 SV=1	-	5.76802e-06	1.38092e-05		4.79488e-05		ON		ON
CD08890	Q18A81_PEPD6	S-adenosylmethionine decarboxylase proenzyme OS=Peptoclostridium difficile (strain 630) GN=speH PE=3 SV=1	-	0.000226961	5.71423e-05		4.7114e-05		ON		ON
CD24990	Q182I6_PEPD6	Uncharacterized protein OS=Peptoclostridium difficile (strain 630) GN=CD24990 PE=4 SV=1	-	0.000912401	0.000178413		3.70364e-05		ON		ON
CD36560	Q181Q9_PEPD6	Uncharacterized protein OS=Peptoclostridium difficile (strain 630) GN=CD36560 PE=4 SV=1	-	2.67132e-05			3.66389e-05		ON		ON
CD05150	Q188W3_PEPD6	D-alanyl-D-alanine carboxypeptidase, S11 peptidase family OS=Peptoclostridium difficile (strain 630) GN=CD05150 PE=3 SV=2	-	2.11488e-05	2.79374e-05		3.43783e-05		ON		ON
CD21270	Q185R5_PEPD6	Putative exported protein OS=Peptoclostridium difficile (strain 630) GN=CD21270 PE=4 SV=1	-	2.38387e-05	2.46499e-05		3.29826e-05		ON		ON
CD36570	Q181Q8_PEPD6	Replicative DNA helicase, dnaC OS=Peptoclostridium difficile (strain 630) GN=dnaC PE=4 SV=1	-	6.13171e-05	6.63621e-05		3.16534e-05		ON		ON
CD00180	RECR_PEPD6	Recombination protein RecR OS=Peptoclostridium difficile (strain 630) GN=recR PE=3 SV=1	-	2.3971e-05			2.90563e-05		ON		ON
CD14750	Q18BZ6_PEPD6	Putative hydrolase OS=Peptoclostridium difficile (strain 630) GN=CD14750 PE=4 SV=2	-	2.15075e-05	2.29591e-05		2.87805e-05		ON		ON
CD16480	Q186K3_PEPD6	ABC-type transport system, iron-family permease OS=Peptoclostridium difficile (strain 630) GN=CD16480 PE=4 SV=1	-	5.61552e-05	5.14325e-05		2.75458e-05		ON		ON
CD33990	Q180P6_PEPD6	Putative gluconeogenesis factor OS=Peptoclostridium difficile (strain 630) GN=CD33990 PE=3 SV=1	-	2.28666e-05	3.55361e-05		2.41585e-05		ON		ON
CD22030	Q185Z0_PEPD6	Transcriptional regulator, TetR family OS=Peptoclostridium difficile (strain 630) GN=CD22030 PE=4 SV=1	-	2.01806e-05	3.43368e-05		2.36034e-05		ON		ON
CD08880	Q18A82_PEPD6	Arginine decarboxylase OS=Peptoclostridium difficile (strain 630) GN=speA PE=4 SV=1	-	0.000124012			2.08852e-05		ON		ON
CD08340	Q18A33_PEPD6	Isocitrate dehydrogenase NAD-dependent OS=Peptoclostridium difficile (strain 630) GN=icd PE=3 SV=1	-	3.74023e-05			1.93669e-05		ON		ON
CD22200	Q186B1_PEPD6	Putative cyclic nucleotides-binding protein OS=Peptoclostridium difficile (strain 630) GN=CD22200 PE=4 SV=1	-	1.68119e-05			1.93278e-05		ON		ON
CD16750	Q186N0_PEPD6	Transcriptional regulator, hxlR family OS=Peptoclostridium difficile (strain 630) GN=CD16750 PE=4 SV=1	-	2.26265e-05			1.87374e-05		ON		ON
CD04710	Q188R8_PEPD6	Transcriptional regulator, Penicillinase repressor OS=Peptoclostridium difficile (strain 630) GN=blaI PE=4 SV=1	-	2.87892e-05	2.64096e-05		1.79795e-05		ON		ON
CD08710	Q18A62_PEPD6	ABC-type transport system, molybdenum-specific ATP-binding protein OS=Peptoclostridium difficile (strain 630) GN=modC PE=3 SV=1	-	1.65079e-05	2.55765e-05		1.67663e-05		ON		ON
CD30670	Q184Q3_PEPD6	PTS system, xyloside-specific IIA component OS=Peptoclostridium difficile (strain 630) GN=xynA PE=4 SV=1	-	1.19465e-05	2.49469e-05		1.6707e-05		ON		ON
CD22850	Q185F5_PEPD6	Transcriptional regulator, GntR family OS=Peptoclostridium difficile (strain 630) GN=CD22850 PE=4 SV=1	-	1.36919e-05	4.11379e-05		1.65217e-05		ON		ON
CD28300	ZMP1_PEPD6	Zinc metalloprotease Zmp1 OS=Peptoclostridium difficile (strain 630) GN=zmp1 PE=1 SV=1	-	2.20846e-05	4.42622e-05		1.51152e-05		ON		ON
CD29650	Q184F2_PEPD6	Putative signaling protein OS=Peptoclostridium difficile (strain 630) GN=CD29650 PE=4 SV=1	-	0.000116591	2.01845e-05		1.47626e-05		ON		ON
CD34910	Q180Z0_PEPD6	Putative exopolyphosphatase OS=Peptoclostridium difficile (strain 630) GN=CD34910 PE=4 SV=1	-	4.95348e-05	2.76481e-05		1.45006e-05		ON		ON
CD05490	Q188Z7_PEPD6	Uncharacterized protein OS=Peptoclostridium difficile (strain 630) GN=CD05490 PE=4 SV=1	-	4.13635e-06	9.05972e-06		1.19377e-05		ON		ON
CD09960	Q18AJ7_PEPD6	Uncharacterized protein OS=Peptoclostridium difficile (strain 630) GN=CD09960 PE=4 SV=1	-	6.64016e-05	4.45709e-05		1.14915e-05		ON		ON
CD25400	Q182M6_PEPD6	Coenzyme A disulfide reductase OS=Peptoclostridium difficile (strain 630) GN=CD25400 PE=4 SV=1	-	2.59811e-05	1.21128e-05		9.26254e-06		ON		ON
CD17230	Q186S9_PEPD6	Putative acyltransferase OS=Peptoclostridium difficile (strain 630) GN=CD17230 PE=4 SV=1	-	2.4398e-05			8.8586e-06		ON		ON
CD08210	Q18A16_PEPD6	Two-component sensor histidine kinase OS=Peptoclostridium difficile (strain 630) GN=CD08210 PE=4 SV=1	-	8.81273e-06			7.50668e-06		ON		ON
CD07380	Q189T6_PEPD6	Putative exported protein OS=Peptoclostridium difficile (strain 630) GN=CD07380 PE=4 SV=1	-	2.82355e-05			7.35238e-06		ON		ON
CD28760	Q183W1_PEPD6	ABC-type transport system, ferrichrome-specific permease OS=Peptoclostridium difficile (strain 630) GN=fhuG PE=4 SV=1	-	3.76537e-05	3.47543e-05		6.3554e-06		ON		ON
CD20220	Q187Z0_PEPD6	Uncharacterized protein OS=Peptoclostridium difficile (strain 630) GN=CD20220 PE=4 SV=1	-	2.08733e-05	3.01459e-05		6.08083e-06		ON		ON
CD18800	Q187J3_PEPD6	Uncharacterised protein OS=Peptoclostridium difficile (strain 630) GN=CD18800 PE=4 SV=1	-	2.13385e-06			5.43883e-06		ON		ON
CD27770	Q183L2_PEPD6	Putative membrane protein OS=Peptoclostridium difficile (strain 630) GN=CD27770 PE=4 SV=1	-	9.76468e-06	7.50771e-06		5.27972e-06		ON		ON
CD02150	Q18CV0_PEPD6	Transposase IS200/IS605-like OrfA OS=Peptoclostridium difficile (strain 630) GN=CD02150 PE=4 SV=1	-	1.62871e-05	1.11457e-05		5.271e-06		ON		ON
CD16590	Q186L3_PEPD6	Cation-transporting ATPase OS=Peptoclostridium difficile (strain 630) GN=CD16590 PE=3 SV=1	-	1.15338e-05	6.34308e-07		4.77092e-06		ON		ON
CD12950	Q18BF7_PEPD6	Segregation and condensation protein A OS=Peptoclostridium difficile (strain 630) GN=scpA PE=3 SV=1	-	7.04572e-06	3.97076e-06		4.61287e-06		ON		ON
CD35990	Q181K0_PEPD6	Two-component sensor histidine kinase OS=Peptoclostridium difficile (strain 630) GN=CD35990 PE=4 SV=1	-	6.04271e-06	9.0695e-06		4.37841e-06		ON		ON
CD02590	Q18D02_PEPD6	Flagellar protein FliZ OS=Peptoclostridium difficile (strain 630) GN=fliZ PE=4 SV=1	-	3.22197e-06			3.7592e-06		ON		ON
CD33590	Q180K4_PEPD6	ABC-type transport system, ATP-binding protein OS=Peptoclostridium difficile (strain 630) GN=CD33590 PE=3 SV=1	-	1.25498e-05	3.08269e-06		3.64724e-06		ON		ON
CD32970	Q180E1_PEPD6	Uncharacterized protein OS=Peptoclostridium difficile (strain 630) GN=CD32970 PE=4 SV=1	-	5.67073e-06			3.60969e-06		ON		ON
CD10870	Q18AU0_PEPD6	Zinc transporter ZupT OS=Peptoclostridium difficile (strain 630) GN=zupT PE=3 SV=1	-	0.000140994	0.000155504		2.45603e-06		ON		ON
CD27530	Q183I9_PEPD6	Putative signaling protein OS=Peptoclostridium difficile (strain 630) GN=CD27530 PE=4 SV=1	-	2.53371e-06			2.12226e-06		ON		ON
CD18190	Q187C9_PEPD6	Putative membrane protein OS=Peptoclostridium difficile (strain 630) GN=CD18190 PE=4 SV=1	-	0.000127524	6.04244e-05		5.01982e-07		ON		ON
CD35270	Q181C6_PEPD6	ABC-type transport system, iron-family ATP-binding protein OS=Peptoclostridium difficile (strain 630) GN=CD35270 PE=3 SV=1	-				6.12092e-05				ON
CD03240	Q18D63_PEPD6	Cobalt transport protein CbiM OS=Peptoclostridium difficile (strain 630) GN=cbiM PE=3 SV=1	-				5.09356e-05				ON
CD09970	Q18AJ6_PEPD6	Two-component sensor histidine kinase OS=Peptoclostridium difficile (strain 630) GN=CD09970 PE=4 SV=2	-				4.51691e-05				ON
CD33460	Q180J1_PEPD6	Putative conjugative transposon protein DUF961 family Tn916-like, CTn6-Orf24 OS=Peptoclostridium difficile (strain 630) GN=CD33460 PE=4 SV=1	-				4.16254e-05				ON
CD01510	Q18CP1_PEPD6	Putative alanine acetyltransferase, ribosomal family OS=Peptoclostridium difficile (strain 630) GN=rimI PE=4 SV=1	-				3.66463e-05				ON
CD14770	Q18BZ7_PEPD6	Ferrous iron transport protein OS=Peptoclostridium difficile (strain 630) GN=feoA PE=4 SV=1	-		4.83651e-05		3.5712e-05				ON
CD15680	Q186C3_PEPD6	Uncharacterized protein OS=Peptoclostridium difficile (strain 630) GN=CD15680 PE=4 SV=1	-		1.70344e-05		2.78276e-05				ON
CD13660	Q18BM6_PEPD6	Putative phage tail protein OS=Peptoclostridium difficile (strain 630) GN=CD13660 PE=4 SV=1	-				2.57331e-05				ON
CD18230	Y1823_PEPD6	UPF0246 protein CD18230 OS=Peptoclostridium difficile (strain 630) GN=CD18230 PE=3 SV=1	-		2.08008e-05		2.47807e-05				ON
CD27220	Q183F8_PEPD6	Two-component response regulator OS=Peptoclostridium difficile (strain 630) GN=CD27220 PE=4 SV=1	-				2.38422e-05				ON
CD30400	Q184M9_PEPD6	Uncharacterized protein OS=Peptoclostridium difficile (strain 630) GN=CD30400 PE=4 SV=1	-		6.02493e-05		2.35434e-05				ON
CD07430	Q189T8_PEPD6	Transcriptional regulator, DeoR family OS=Peptoclostridium difficile (strain 630) GN=CD07430 PE=4 SV=1	-				2.03568e-05				ON
CD18990	Q187L0_PEPD6	Putative dCMP deaminase OS=Peptoclostridium difficile (strain 630) GN=CD18990 PE=4 SV=1	-		1.54277e-05		1.99862e-05				ON
CD08820	GLGC_PEPD6	Glucose-1-phosphate adenylyltransferase OS=Peptoclostridium difficile (strain 630) GN=glgC PE=3 SV=1	-		1.48248e-05		1.50424e-05				ON
CD36100	Q181L2_PEPD6	Putative glyoxalase OS=Peptoclostridium difficile (strain 630) GN=CD36100 PE=4 SV=1	-		3.2673e-05		1.48139e-05				ON
CD17150	Q186S2_PEPD6	Putative molybdenum cofactor sulfurase OS=Peptoclostridium difficile (strain 630) GN=CD17150 PE=4 SV=1	-				1.36334e-05				ON
CD01320	Q18CM1_PEPD6	Putative DNA helicase, RecD/TraA type OS=Peptoclostridium difficile (strain 630) GN=CD01320 PE=4 SV=1	-				1.32159e-05				ON
CD05030	Q188U3_PEPD6	Putative membrane protein Tn5397, CTn3-Orf15 OS=Peptoclostridium difficile (strain 630) GN=CD05030 PE=4 SV=1	-				1.15315e-05				ON
CD33560	Q180K3_PEPD6	Transcriptional regulator, hxlR family OS=Peptoclostridium difficile (strain 630) GN=CD33560 PE=4 SV=1	-				1.10758e-05				ON
CD36720	Q181S6_PEPD6	Transcriptional regulator, sporulation initiation inhibitor, chromosome partitioning protein OS=Peptoclostridium difficile (strain 630) GN=soj PE=4 SV=1	-		1.66263e-05		1.09098e-05				ON
CD18070	Q187B8_PEPD6	Putative NADPH-dependent FMN reductase OS=Peptoclostridium difficile (strain 630) GN=CD18070 PE=4 SV=1	-				1.07083e-05				ON
CD00470	ISPD_PEPD6	2-C-methyl-D-erythritol 4-phosphate cytidylyltransferase OS=Peptoclostridium difficile (strain 630) GN=ispD PE=3 SV=1	-				9.7063e-06				ON
CD14120	Q18BT0_PEPD6	Transcriptional regulator, sigma-54-dependent OS=Peptoclostridium difficile (strain 630) GN=CD14120 PE=4 SV=1	-		9.79609e-06		8.84917e-06				ON
CD14060	Q18BS6_PEPD6	Uncharacterized protein OS=Peptoclostridium difficile (strain 630) GN=CD14060 PE=4 SV=1	-				7.54561e-06				ON
CD22160	Q186A7_PEPD6	Uncharacterised protein OS=Peptoclostridium difficile (strain 630) GN=CD22160 PE=4 SV=1	-				7.52555e-06				ON
CD19450	Q187Q5_PEPD6	Putative glyoxalase OS=Peptoclostridium difficile (strain 630) GN=CD19450 PE=4 SV=1	-				7.43574e-06				ON
CD34250	Q180S4_PEPD6	Cobalamin biosynthesis protein CbiG OS=Peptoclostridium difficile (strain 630) GN=cbiG PE=4 SV=1	-				6.74397e-06				ON
CD30330	Q184M2_PEPD6	Thioredoxin OS=Peptoclostridium difficile (strain 630) GN=trxA1 PE=3 SV=1	-				6.49523e-06				ON
CD06120	Q189F6_PEPD6	ABC-type transport system, permease OS=Peptoclostridium difficile (strain 630) GN=CD06120 PE=4 SV=1	-				6.31382e-06				ON
CD01470	Q18CN8_PEPD6	Putative transporter OS=Peptoclostridium difficile (strain 630) GN=CD01470 PE=4 SV=1	-				5.91095e-06				ON
CD32200	Q17ZW4_PEPD6	Putative methyltransferase OS=Peptoclostridium difficile (strain 630) GN=CD32200 PE=4 SV=1	-				5.51235e-06				ON
CD18060	Q187B6_PEPD6	Fructokinase OS=Peptoclostridium difficile (strain 630) GN=scrK PE=4 SV=1	-				5.00879e-06				ON
CD20230	Q187Y9_PEPD6	Transcriptional regulator, GntR family OS=Peptoclostridium difficile (strain 630) GN=CD20230 PE=4 SV=1	-		3.937e-06		4.24705e-06				ON
CD26370	Q182X0_PEPD6	Two-component sensor histidine kinase OS=Peptoclostridium difficile (strain 630) GN=CD26370 PE=4 SV=1	-				3.64917e-06				ON
CD13600	Q18BM2_PEPD6	Transcriptional regulator, Phage-type OS=Peptoclostridium difficile (strain 630) GN=CD13600 PE=4 SV=1	-				1.67811e-06				ON
CD13740	Q18BP3_PEPD6	Putative beta-lactamase-inhibitor protein II OS=Peptoclostridium difficile (strain 630) GN=CD13740 PE=4 SV=1	-				1.31891e-06				ON
CD23340	Q185K8_PEPD6	PTS system, mannitol-specific, IICB component OS=Peptoclostridium difficile (strain 630) GN=mtlA PE=4 SV=1	-	6.78737e-06		5.98361e-05			-3.14009	**	OFF
CD23320	Q185K6_PEPD6	PTS system, mannitol-specific, EIIA component OS=Peptoclostridium difficile (strain 630) GN=mtlF PE=4 SV=1	-	1.58587e-05		4.5991e-05			-1.53608	**	OFF
CD33140	Q180F8_PEPD6	Iron hydrogenase OS=Peptoclostridium difficile (strain 630) GN=hydA PE=4 SV=1	-	1.09762e-05		2.69482e-05			-1.29581	**	OFF
CD07250	Q189S1_PEPD6	Bifunctional carbon monoxide dehydrogenase/acetyl-CoA synthase, subunit delta OS=Peptoclostridium difficile (strain 630) GN=CD07250 PE=4 SV=1	-	8.9936e-06		2.12752e-05			-1.2422	**	OFF
CD35260	Q181C5_PEPD6	ABC-type transport system, iron-family permease OS=Peptoclostridium difficile (strain 630) GN=CD35260 PE=3 SV=1	-	4.75041e-06	4.58978e-06	1.04601e-05			-1.13877	**	OFF
CD31000	Q184T7_PEPD6	Putative C4-dicarboxylate anaerobic carrier,DcuC family OS=Peptoclostridium difficile (strain 630) GN=CD31000 PE=4 SV=1	-	1.07438e-05		2.36202e-05			-1.13652	**	OFF
CD11600	Q18B21_PEPD6	Ribonuclease G (RNase G) (Cytoplasmic axial filament protein) OS=Peptoclostridium difficile (strain 630) GN=rng PE=4 SV=1	-	6.55676e-06		1.37732e-05			-1.07081		OFF
CD25700	Q182Q8_PEPD6	Two-component sensor histidine kinase OS=Peptoclostridium difficile (strain 630) GN=CD25700 PE=4 SV=2	-	1.48079e-06		2.96801e-06			-1.00313		OFF
CD14400	Q18BV9_PEPD6	Putative transporter, LrgB family OS=Peptoclostridium difficile (strain 630) GN=CD14400 PE=4 SV=1	-	8.12836e-07		1.57785e-06			-0.956929	**	OFF
CD24080	Q181Z3_PEPD6	Putative multidrug efflux pump OS=Peptoclostridium difficile (strain 630) GN=CD24080 PE=4 SV=2	-	1.00991e-05	1.89443e-05	1.87045e-05			-0.889153		OFF
CD09850	Q18AI5_PEPD6	Putative drug/sodium antiporter, MATE family OS=Peptoclostridium difficile (strain 630) GN=CD09850 PE=4 SV=1	-	5.4315e-06		9.86533e-06			-0.861015		OFF
CD35970	Q181J9_PEPD6	Putative S-adenosyl-L-methionine dependent methionine synthase OS=Peptoclostridium difficile (strain 630) GN=CD35970 PE=4 SV=1	-	6.03699e-06		1.08174e-05			-0.841458		OFF
CD20870	Q188F4_PEPD6	Putative xanthine dehydrogenase OS=Peptoclostridium difficile (strain 630) GN=CD20870 PE=4 SV=1	-	3.16519e-05		5.61577e-05			-0.827191		OFF
CD17290	Q186T5_PEPD6	Putative sodium:phosphate symporter OS=Peptoclostridium difficile (strain 630) GN=CD17290 PE=4 SV=1	-	2.54534e-06		4.05397e-06			-0.671477		OFF
CD24820	Q182G8_PEPD6	Putative lipoprotein OS=Peptoclostridium difficile (strain 630) GN=CD24820 PE=4 SV=1	-	1.21654e-05	1.19929e-05	1.86968e-05			-0.620012		OFF
CD34290	CBID_PEPD6	Cobalt-precorrin-5B C(1)-methyltransferase OS=Peptoclostridium difficile (strain 630) GN=cbiD PE=3 SV=1	-	9.76827e-06	6.1832e-06	1.26586e-05			-0.373946		OFF
CD31860	Q181V1_PEPD6	Transcriptional regulator, sigma-54-dependent OS=Peptoclostridium difficile (strain 630) GN=CD31860 PE=4 SV=2	-	1.17088e-05		1.46708e-05			-0.325351		OFF
CD24400	YBEY_PEPD6	Endoribonuclease YbeY OS=Peptoclostridium difficile (strain 630) GN=ybeY PE=3 SV=1	-	1.21155e-05	7.05278e-06	1.51329e-05			-0.320834		OFF
CD11230	Q18AY0_PEPD6	Putative phosphoesterase OS=Peptoclostridium difficile (strain 630) GN=CD11230 PE=4 SV=1	-	3.03417e-06		3.6188e-06			-0.254211		OFF
CD18710	Q187I1_PEPD6	Putative oxidoreductase Tn1549-like,CTn5-Orf30 OS=Peptoclostridium difficile (strain 630) GN=CD18710 PE=4 SV=1	-	1.4023e-05		1.64762e-05			-0.232592		OFF
CD30000	Q184J1_PEPD6	Dihydrodipicolinate synthase 1 OS=Peptoclostridium difficile (strain 630) GN=dapA1 PE=3 SV=1	-	1.38998e-05		1.58982e-05			-0.193795		OFF
CD30030	Q184J3_PEPD6	Putative N-terminus region of carbohydrate hydrolase, SAF domain OS=Peptoclostridium difficile (strain 630) GN=CD30030 PE=4 SV=1	-	3.33972e-05		3.70621e-05			-0.150217		OFF
CD02600	Q18D01_PEPD6	Flagellar biosynthesis protein FliP OS=Peptoclostridium difficile (strain 630) GN=fliP PE=3 SV=1	-	1.76689e-05	1.31444e-05	1.95128e-05			-0.143209		OFF
CD30020	Q184J4_PEPD6	D-galactate dehydratase/Altronate hydrolase OS=Peptoclostridium difficile (strain 630) GN=uxaA PE=4 SV=1	-	0.000112886		0.00012275			-0.120857		OFF
CD12960	SCPB_PEPD6	Segregation and condensation protein B OS=Peptoclostridium difficile (strain 630) GN=scpB PE=3 SV=1	-	3.00772e-05		3.25514e-05			-0.114052		OFF
CD14041	Q18BS2_PEPD6	Uncharacterized protein OS=Peptoclostridium difficile (strain 630) GN=CD14041 PE=4 SV=1	-	1.07767e-05	1.09983e-05	1.13037e-05			-0.0688772		OFF
CD31370	Q184X5_PEPD6	PTS system, beta-glucoside-specific IIABC component, bglF5 OS=Peptoclostridium difficile (strain 630) GN=bglF5 PE=4 SV=1	-	1.66827e-05	1.86842e-05	1.66542e-05			0.00246026		OFF
CD25250	RECX_PEPD6	Regulatory protein RecX OS=Peptoclostridium difficile (strain 630) GN=recX PE=3 SV=1	-	1.90107e-05	1.99349e-05	1.89734e-05			0.0028326		OFF
CD18750	Q187I7_PEPD6	ABC-type transport system, permease Tn1549-like,CTn5-Orf35 OS=Peptoclostridium difficile (strain 630) GN=vexP3 PE=4 SV=1	-	3.52067e-06		3.50955e-06			0.00456458		OFF
CD15090	Q18C31_PEPD6	Putative lipoprotein OS=Peptoclostridium difficile (strain 630) GN=CD15090 PE=4 SV=1	-	9.01145e-06		8.77832e-06			0.0378143		OFF
CD28250	Q183R0_PEPD6	Putative flavodoxin OS=Peptoclostridium difficile (strain 630) GN=CD28250 PE=4 SV=1	-	6.13073e-06	9.36273e-06	5.9494e-06			0.0433143		OFF
CD11660	Q18B25_PEPD6	Homoserine dehydrogenase OS=Peptoclostridium difficile (strain 630) GN=hom1 PE=3 SV=1	-	2.06143e-05		1.99822e-05			0.0449298		OFF
CD01540	HPDS_PEPD6	4-hydroxyphenylacetate decarboxylase small subunit OS=Peptoclostridium difficile (strain 630) GN=hpdC PE=3 SV=1	-	2.57126e-05		2.49092e-05			0.0457975		OFF
CD26691	Q183A2_PEPD6	Putative Na(+)/H(+) antiporter OS=Peptoclostridium difficile (strain 630) GN=CD26691 PE=4 SV=1	-	1.73976e-06		1.67816e-06			0.052001		OFF
CD11520	Q18B10_PEPD6	Rod shape-determining protein MrdB OS=Peptoclostridium difficile (strain 630) GN=mrdB PE=4 SV=1	-	2.88172e-05		2.77926e-05			0.0522297		OFF
CD34270	Q180S6_PEPD6	Cobalt-precorrin-6Y C(15)-methyltransferase OS=Peptoclostridium difficile (strain 630) GN=cbiT PE=4 SV=1	-	4.04579e-05	1.6521e-05	3.82783e-05			0.0798947		OFF
CD06280	Q189G9_PEPD6	Putative membrane protein OS=Peptoclostridium difficile (strain 630) GN=CD06280 PE=4 SV=1	-	0.00055372		0.000521408			0.086745		OFF
CD07700	Q189W5_PEPD6	Anti-sigma F factor antagonist OS=Peptoclostridium difficile (strain 630) GN=spoIIAA PE=3 SV=1	-	2.49334e-05	2.53274e-05	2.30774e-05			0.111598		OFF
CD21330	Q185S0_PEPD6	Uncharacterized protein OS=Peptoclostridium difficile (strain 630) GN=CD21330 PE=4 SV=1	-	3.63834e-05		3.28065e-05			0.149298		OFF
CD16880	Q186P5_PEPD6	Two-component response regulator OS=Peptoclostridium difficile (strain 630) GN=CD16880 PE=4 SV=1	-	2.93666e-05	2.0137e-05	2.53079e-05			0.214586		OFF
CD17610	Q186X0_PEPD6	Putative phenazine biosynthesis PhzC/PhzF protein OS=Peptoclostridium difficile (strain 630) GN=CD17610 PE=1 SV=1	-	8.28035e-06	6.63571e-06	7.08944e-06			0.22402		OFF
CD31360	Q184X3_PEPD6	6-phospho-beta-glucosidase, bglA7 OS=Peptoclostridium difficile (strain 630) GN=bglA7 PE=3 SV=1	-	1.13612e-05	1.21829e-05	9.44044e-06			0.267189		OFF
CD25580	Q182P5_PEPD6	Phosphopantetheine adenylyltransferase OS=Peptoclostridium difficile (strain 630) GN=coaD PE=3 SV=1	-	4.04717e-05	3.48582e-05	3.20695e-05			0.335714		OFF
CD07760	Q189W9_PEPD6	Transcriptional regulator, LacI family OS=Peptoclostridium difficile (strain 630) GN=CD07760 PE=4 SV=1	-	1.87301e-05		1.47769e-05			0.342011		OFF
CD03460	Q18D81_PEPD6	Putative phosphoesterase OS=Peptoclostridium difficile (strain 630) GN=CD03460 PE=4 SV=1	-	2.09074e-05		1.61766e-05			0.370102		OFF
CD01030	Q18CJ2_PEPD6	tRNA pseudouridine synthase A OS=Peptoclostridium difficile (strain 630) GN=truA1 PE=3 SV=1	-	4.84703e-05	2.31918e-05	3.68216e-05			0.396547	**	OFF
CD07120	Q189Q6_PEPD6	Uncharacterized protein OS=Peptoclostridium difficile (strain 630) GN=CD07120 PE=4 SV=1	-	7.55597e-06		5.73794e-06			0.397085		OFF
CD35490	Q181E8_PEPD6	DNA polymerase III, delta prime subunit OS=Peptoclostridium difficile (strain 630) GN=CD35490 PE=4 SV=1	-	2.92631e-05	1.59395e-05	2.15869e-05			0.438929	**	OFF
CD08720	Q18A66_PEPD6	Maltose O-acetyltransferase OS=Peptoclostridium difficile (strain 630) GN=maa PE=1 SV=1	-	1.39247e-05	9.25597e-06	9.89242e-06			0.493253		OFF
CD23940	Q181X9_PEPD6	DNA polymerase III, epsilon subunit OS=Peptoclostridium difficile (strain 630) GN=dnaQ PE=4 SV=1	-	5.63078e-05	4.18518e-05	3.99637e-05			0.494646		OFF
CD35820	Q181I2_PEPD6	Putative pseudouridine synthase RsuA-like OS=Peptoclostridium difficile (strain 630) GN=CD35820 PE=4 SV=1	-	1.13033e-05		7.90495e-06			0.515918		OFF
CD05660	Q189B1_PEPD6	Putative tRNA (cytidine(34)-2'-O)-methyltransferase OS=Peptoclostridium difficile (strain 630) GN=CD05660 PE=3 SV=1	-	3.31344e-05	1.14441e-05	2.28998e-05			0.532997		OFF
CD27570	Q183J4_PEPD6	Putative phospholipase OS=Peptoclostridium difficile (strain 630) GN=CD27570 PE=4 SV=1	-	0.000202173	0.000224757	0.000138824			0.54233	**	OFF
CD10970	Q18AU9_PEPD6	ABC-type transport system, multidrug-family ATP-binding protein Tn1549-like, CTn4-Orf28 OS=Peptoclostridium difficile (strain 630) GN=CD10970 PE=3 SV=1	-	3.54629e-05	3.44193e-05	2.39554e-05			0.56596		OFF
CD03100	Q18D55_PEPD6	Uncharacterized protein OS=Peptoclostridium difficile (strain 630) GN=CD03100 PE=4 SV=1	-	3.11244e-05		2.07474e-05			0.585116		OFF
CD19310	LEXA_PEPD6	LexA repressor OS=Peptoclostridium difficile (strain 630) GN=lexA PE=3 SV=2	-	6.47317e-05	4.72167e-05	4.26512e-05			0.601887		OFF
CD19780	Q187T8_PEPD6	ABC-type transport system, ATP-binding protein OS=Peptoclostridium difficile (strain 630) GN=CD19780 PE=3 SV=1	-	3.01397e-05	3.70553e-05	1.88453e-05			0.677458		OFF
CD26310	PLSY_PEPD6	Glycerol-3-phosphate acyltransferase OS=Peptoclostridium difficile (strain 630) GN=plsY PE=3 SV=1	-	3.96388e-05	2.52989e-05	2.44104e-05			0.69942	**	OFF
CD22140	Q186A3_PEPD6	Transcriptional regulator, HTH-type OS=Peptoclostridium difficile (strain 630) GN=SinR PE=4 SV=1	-	1.85271e-05	1.02624e-05	1.1282e-05			0.715607		OFF
CD36050	Q181K6_PEPD6	Putative phosphatase OS=Peptoclostridium difficile (strain 630) GN=CD36050 PE=1 SV=1	-	1.83929e-05	1.6085e-05	1.07596e-05			0.773522	**	OFF
CD28460	Q183T3_PEPD6	Uncharacterized protein OS=Peptoclostridium difficile (strain 630) GN=CD28460 PE=4 SV=1	-	5.53423e-05		3.16849e-05			0.804584	**	OFF
CD12940	Q18BF8_PEPD6	Putative membrane-associated peptidase, M25 family OS=Peptoclostridium difficile (strain 630) GN=CD12940 PE=4 SV=1	-	1.31348e-05		6.95444e-06			0.917384		OFF
CD10030	Q18AK2_PEPD6	Fumarate hydratase class I, subunit A OS=Peptoclostridium difficile (strain 630) GN=fumA PE=4 SV=1	-	4.87577e-05	5.77905e-05	2.51298e-05			0.956229		OFF
CD14560	Q18BX6_PEPD6	Putative SAM-dependent methyltransferase OS=Peptoclostridium difficile (strain 630) GN=CD14560 PE=4 SV=1	-	1.55199e-05	9.14143e-06	7.94875e-06			0.965319		OFF
CD22420	Q185B8_PEPD6	Uncharacterized protein OS=Peptoclostridium difficile (strain 630) GN=CD22420 PE=4 SV=2	-	2.01511e-05	1.4906e-05	1.01809e-05			0.984996		OFF
CD30060	Q184J7_PEPD6	Alcohol dehydrogenase OS=Peptoclostridium difficile (strain 630) GN=CD30060 PE=4 SV=1	-	0.000190608		9.39225e-05			1.02107	**	OFF
CD05200	Q188W9_PEPD6	Two-component sensor histidine kinase OS=Peptoclostridium difficile (strain 630) GN=CD05200 PE=4 SV=1	-	1.2568e-05		6.02085e-06			1.06172	**	OFF
CD16920	Q186P8_PEPD6	Transcriptional regulator, ArsR family OS=Peptoclostridium difficile (strain 630) GN=CD16920 PE=4 SV=1	-	0.000130505	2.87887e-05	5.85309e-05			1.15684		OFF
CD16440	Q186J9_PEPD6	Transcriptional regulator, RmlC-type OS=Peptoclostridium difficile (strain 630) GN=CD16440 PE=4 SV=1	-	2.87893e-05		1.25998e-05			1.19213	**	OFF
CD16410	Q186J6_PEPD6	Uncharacterized protein OS=Peptoclostridium difficile (strain 630) GN=CD16410 PE=4 SV=2	-	2.09453e-05		8.78562e-06			1.25341	**	OFF
CD32890	Q180D2_PEPD6	Uncharacterized protein OS=Peptoclostridium difficile (strain 630) GN=CD32890 PE=4 SV=1	-	5.52328e-05		2.15707e-05			1.35645		OFF
CD17130	Q186S0_PEPD6	Molybdenum cofactor biosynthesis protein MoaA OS=Peptoclostridium difficile (strain 630) GN=moaA PE=4 SV=1	-	2.64378e-05		1.00642e-05			1.39337	**	OFF
CD33250	Q180H0_PEPD6	Uncharacterized protein OS=Peptoclostridium difficile (strain 630) GN=CD33250 PE=4 SV=1	-	3.06058e-05	6.64536e-06	7.65767e-06			1.99883	**	OFF
CD04230	Q188L2_PEPD6	Putative DNA/RNA helicase Tn1549-like,CTn2-Orf18 OS=Peptoclostridium difficile (strain 630) GN=CD04230 PE=4 SV=1	-	8.2198e-05	5.41624e-05	1.66993e-05			2.29932	**	OFF
CD25690	Q182Q9_PEPD6	Putative glycoside hydrolase, family 38 putative alpha-mannosidase OS=Peptoclostridium difficile (strain 630) GN=CD25690 PE=4 SV=1	-	2.01002e-05		2.68511e-06			2.90415	**	OFF
CD22090	Q185Z9_PEPD6	GTPase HflX OS=Peptoclostridium difficile (strain 630) GN=hflX PE=3 SV=1	-	0.000128105	1.74726e-05	1.54184e-05			3.0546	**	OFF
CD30300	Q184L8_PEPD6	PTS system, glucose-like IIBC component OS=Peptoclostridium difficile (strain 630) GN=CD30300 PE=4 SV=1	-	2.97285e-05	5.15585e-05	3.19476e-06			3.21807	**	OFF
CD06700	Q189L8_PEPD6	Transcriptional regulator, beta-lactams repressor OS=Peptoclostridium difficile (strain 630) GN=CD06700 PE=4 SV=1	-	5.91548e-05	0.000127674	4.66144e-06			3.66565		OFF
CD21040	Q188H1_PEPD6	ABC-type transport system, permease OS=Peptoclostridium difficile (strain 630) GN=CD21040 PE=4 SV=1	-	2.50442e-05	1.80303e-05	1.0874e-06			4.52553	**	OFF
CD03950	Q188I3_PEPD6	Isocaprenoyl-CoA:2-hydroxyisocaproate CoA-transferase OS=Peptoclostridium difficile (strain 630) GN=hadA PE=4 SV=1	-		9.80265e-06	0.00146444			OFF		OFF
CD03970	Q188I1_PEPD6	Subunit of oxygen-sensitive 2-hydroxyisocaproyl-CoA dehydratase B OS=Peptoclostridium difficile (strain 630) GN=hadB PE=4 SV=2	-			0.000442532			OFF		OFF
CD03940	Q188H7_PEPD6	D-lactate dehydrogenase OS=Peptoclostridium difficile (strain 630) GN=ldhA PE=3 SV=1	-			0.00027472			OFF		OFF
CD11400	Q18AZ8_PEPD6	Electron transport complex subunit E OS=Peptoclostridium difficile (strain 630) GN=rnfE PE=3 SV=1	-		8.69563e-05	0.000143407			OFF		OFF
CD03960	Q188I2_PEPD6	Activator of 2-hydroxyisocaproyl-CoA dehydratase OS=Peptoclostridium difficile (strain 630) GN=hadI PE=4 SV=2	-			0.000129182			OFF		OFF
CD10580	Q18AQ7_PEPD6	3-hydroxybutyryl-CoA dehydrogenase OS=Peptoclostridium difficile (strain 630) GN=hbd PE=4 SV=1	-			0.000122038			OFF		OFF
CD07410	Q189T3_PEPD6	Glycerol kinase (GK) OS=Peptoclostridium difficile (strain 630) GN=glpK1 PE=3 SV=1	-			0.000121295			OFF		OFF
CD03340	Q18D77_PEPD6	Aldehyde-alcohol dehydrogenase OS=Peptoclostridium difficile (strain 630) GN=adhE PE=3 SV=1	-			0.000115456			OFF		OFF
CD10590	THLA_PEPD6	Acetyl-CoA acetyltransferase OS=Peptoclostridium difficile (strain 630) GN=thlA PE=1 SV=1	-			8.85403e-05			OFF		OFF
CD10560	Q18AQ5_PEPD6	Electron transfer flavoprotein subunit alpha OS=Peptoclostridium difficile (strain 630) GN=etfA3 PE=4 SV=1	-			6.69485e-05			OFF		OFF
CD10540	Q18AQ1_PEPD6	Butyryl-CoA dehydrogenase OS=Peptoclostridium difficile (strain 630) GN=bcd2 PE=3 SV=1	-			6.41627e-05			OFF		OFF
CD10550	Q18AQ6_PEPD6	Electron transfer flavoproteins subunit beta OS=Peptoclostridium difficile (strain 630) GN=etfB3 PE=4 SV=2	-			4.2811e-05			OFF		OFF
CD07160	Q189R4_PEPD6	Bifunctional carbon monoxide dehydrogenase/acetyl-CoA synthase (CODH) OS=Peptoclostridium difficile (strain 630) GN=cooS1 PE=4 SV=1	-			3.82758e-05			OFF		OFF
CD27520	Q183I7_PEPD6	Uncharacterized protein OS=Peptoclostridium difficile (strain 630) GN=CD27520 PE=4 SV=1	-			3.77306e-05			OFF		OFF
CD01760	Q18CR6_PEPD6	Putative oxidoreductase, NAD/FAD binding subunit OS=Peptoclostridium difficile (strain 630) GN=CD01760 PE=4 SV=1	-			3.7458e-05			OFF		OFF
CD11710	Q18B33_PEPD6	Electron transfer flavoprotein subunit alpha OS=Peptoclostridium difficile (strain 630) GN=etfB4 PE=4 SV=1	-			3.3918e-05			OFF		OFF
CD18640	Q187H7_PEPD6	Transcriptional regulator, HTH-type Tn1549-like,CTn5-Orf23 OS=Peptoclostridium difficile (strain 630) GN=CD18640 PE=4 SV=1	-			2.36595e-05			OFF		OFF
CD05690	Q189B5_PEPD6	Putative lipoprotein OS=Peptoclostridium difficile (strain 630) GN=CD05690 PE=4 SV=1	-			2.00384e-05			OFF		OFF
CD23510	Q185M3_PEPD6	Glycine reductase complex component B gamma subunit (Selenocysteine) OS=Peptoclostridium difficile (strain 630) GN=grdB PE=4 SV=2	-			1.97934e-05			OFF		OFF
CD07240	Q189S2_PEPD6	Bifunctional carbon monoxide dehydrogenase/acetyl-CoA synthase,nickel-inserting subunit OS=Peptoclostridium difficile (strain 630) GN=CD07240 PE=4 SV=1	-		8.14626e-06	1.97742e-05			OFF		OFF
CD10530	Q18AQ2_PEPD6	Putative oligonucleotide binding protein possibly involved in recognition/discrimination or editing of prolyl-tRNA OS=Peptoclostridium difficile (strain 630) GN=CD10530 PE=4 SV=1	-			1.90005e-05			OFF		OFF
CD17670	Q186X6_PEPD6	Glyceraldehyde-3-phosphate dehydrogenase OS=Peptoclostridium difficile (strain 630) GN=gapB PE=3 SV=1	-			1.80971e-05			OFF		OFF
CD16550	Q186K9_PEPD6	Putative Na+/H+ antiporter NhaC-like OS=Peptoclostridium difficile (strain 630) GN=CD16550 PE=4 SV=1	-			1.77205e-05			OFF		OFF
CD23390	Q185L2_PEPD6	4-hydroxybutyrate CoA transferase OS=Peptoclostridium difficile (strain 630) GN=cat2 PE=4 SV=1	-			1.69232e-05			OFF		OFF
CD28520	Q183T7_PEPD6	D-alanyl transferase DltB, MBOAT family OS=Peptoclostridium difficile (strain 630) GN=dltB PE=4 SV=1	-			1.68096e-05			OFF		OFF
CD22890	Q185G0_PEPD6	Two-component response regulator OS=Peptoclostridium difficile (strain 630) GN=CD22890 PE=4 SV=1	-			1.65247e-05			OFF		OFF
CD11330	Q18AZ2_PEPD6	Uncharacterised protein OS=Peptoclostridium difficile (strain 630) GN=CD11330 PE=4 SV=1	-			1.63786e-05			OFF		OFF
CD23560	Q185M7_PEPD6	Thioredoxin reductase OS=Peptoclostridium difficile (strain 630) GN=trxB3 PE=3 SV=1	-			1.62375e-05			OFF		OFF
CD31330	Q184X1_PEPD6	Transcription antiterminator, PTS operon regulator OS=Peptoclostridium difficile (strain 630) GN=CD31330 PE=4 SV=1	-			1.57484e-05			OFF		OFF
CD03420	Q18D85_PEPD6	Uncharacterized protein OS=Peptoclostridium difficile (strain 630) GN=CD03420 PE=4 SV=1	-			1.54128e-05			OFF		OFF
CD07260	Q189S0_PEPD6	Bifunctional carbon monoxide dehydrogenase/acetyl-CoA synthase, delta subunit OS=Peptoclostridium difficile (strain 630) GN=CD07260 PE=4 SV=1	-			1.53517e-05			OFF		OFF
CD10760	Q18AS8_PEPD6	PTS system, mannose/fructose/sorbose IIB component OS=Peptoclostridium difficile (strain 630) GN=CD10760 PE=4 SV=1	-			1.51004e-05			OFF		OFF
CD01590	Q18CP6_PEPD6	Putative enzyme, glyoxalase family OS=Peptoclostridium difficile (strain 630) GN=CD01590 PE=1 SV=1	-			1.40788e-05			OFF		OFF
CD14410	Q18BW1_PEPD6	Putative membrane protein OS=Peptoclostridium difficile (strain 630) GN=CD14410 PE=4 SV=1	-			1.37426e-05			OFF		OFF
CD07170	Q189R3_PEPD6	Bifunctional carbon monoxide dehydrogenase/acetyl-CoA synthase, accessory protein OS=Peptoclostridium difficile (strain 630) GN=CD07170 PE=4 SV=1	-			1.36649e-05			OFF		OFF
CD36040	Q181K7_PEPD6	Nad dependent epimerase/dehydratase family protein OS=Peptoclostridium difficile (strain 630) GN=CD36040 PE=4 SV=1	-		1.69882e-05	1.28921e-05			OFF		OFF
CD08940	Q18A86_PEPD6	Putative iron-dependent hydrogenase OS=Peptoclostridium difficile (strain 630) GN=CD08940 PE=4 SV=1	-			1.27404e-05			OFF		OFF
CD25790	Q182R8_PEPD6	Putative phosphatase, 2C family OS=Peptoclostridium difficile (strain 630) GN=stp PE=4 SV=1	-			1.22461e-05			OFF		OFF
CD21640	Q185V1_PEPD6	L-lactate dehydrogenase OS=Peptoclostridium difficile (strain 630) GN=ldh PE=3 SV=1	-			1.22089e-05			OFF		OFF
CD27270	Q183G3_PEPD6	Putative membrane protein OS=Peptoclostridium difficile (strain 630) GN=CD27270 PE=4 SV=1	-			1.20948e-05			OFF		OFF
CD36020	Q181K4_PEPD6	Putative ATPase OS=Peptoclostridium difficile (strain 630) GN=CD36020 PE=4 SV=1	-			1.18664e-05			OFF		OFF
CD29580	VATE_PEPD6	V-type ATP synthase subunit E OS=Peptoclostridium difficile (strain 630) GN=atpE PE=3 SV=1	-			1.14898e-05			OFF		OFF
CD28800	Q183W9_PEPD6	PTS system, cellobiose-specific IIA component OS=Peptoclostridium difficile (strain 630) GN=celC PE=4 SV=1	-		7.74902e-06	1.10751e-05			OFF		OFF
CD31790	Q181U4_PEPD6	Dihydroorotate dehydrogenase, catalytic subunit OS=Peptoclostridium difficile (strain 630) GN=pyrD2 PE=4 SV=1	-			1.07241e-05			OFF		OFF
CD34370	COBS_PEPD6	Adenosylcobinamide-GDP ribazoletransferase OS=Peptoclostridium difficile (strain 630) GN=cobS PE=3 SV=1	-			1.01627e-05			OFF		OFF
CD18920	Q187K3_PEPD6	Putative methyltransferase, type 11 family OS=Peptoclostridium difficile (strain 630) GN=CD18920 PE=4 SV=1	-			1.01577e-05			OFF		OFF
CD15730	Q186C7_PEPD6	Transcriptional regulator, HTH-type OS=Peptoclostridium difficile (strain 630) GN=CD15730 PE=4 SV=1	-		2.70902e-05	1.00119e-05			OFF		OFF
CD22620	Q185D6_PEPD6	Transporter, Major Facilitator Superfamily (MFS) OS=Peptoclostridium difficile (strain 630) GN=CD22620 PE=3 SV=1	-			9.90175e-06			OFF		OFF
CD21530	Q185U2_PEPD6	Uncharacterized protein OS=Peptoclostridium difficile (strain 630) GN=CD21530 PE=4 SV=1	-			9.81876e-06			OFF		OFF
CD23550	Q185M8_PEPD6	Thioredoxin OS=Peptoclostridium difficile (strain 630) GN=trxA2 PE=3 SV=1	-			9.65495e-06			OFF		OFF
CD26840	Q183B7_PEPD6	Putative flavodoxin-related protein OS=Peptoclostridium difficile (strain 630) GN=CD26840 PE=4 SV=1	-			8.94168e-06			OFF		OFF
CD30720	Q184Q8_PEPD6	Uncharacterized protein OS=Peptoclostridium difficile (strain 630) GN=CD30720 PE=4 SV=1	-			8.89938e-06			OFF		OFF
CD12330	Q18B95_PEPD6	Putative cell surface protein cwp26 OS=Peptoclostridium difficile (strain 630) GN=cwp26 PE=4 SV=1	-			8.67935e-06			OFF		OFF
CD02980	Q18D40_PEPD6	Transcriptional regulator, LacI family OS=Peptoclostridium difficile (strain 630) GN=rbsR PE=4 SV=2	-			8.60406e-06			OFF		OFF
CD23480	Q185M1_PEPD6	Glycine reductase complex component C subunit alpha (Protein PC alpha) OS=Peptoclostridium difficile (strain 630) GN=grdD PE=4 SV=1	-			8.59835e-06			OFF		OFF
CD24800	Q182G7_PEPD6	Putative hydrolase OS=Peptoclostridium difficile (strain 630) GN=CD24800 PE=4 SV=1	-			8.35143e-06			OFF		OFF
CD08530	Q18A49_PEPD6	ABC-type transport system, oligopeptide-family permease OS=Peptoclostridium difficile (strain 630) GN=oppB PE=3 SV=1	-			8.28817e-06			OFF		OFF
CD12620	RNH2_PEPD6	Ribonuclease HII OS=Peptoclostridium difficile (strain 630) GN=rnhB PE=3 SV=1	-			7.82627e-06			OFF		OFF
CD23330	Q185K7_PEPD6	Transcription antiterminator, PTS operon regulator OS=Peptoclostridium difficile (strain 630) GN=mtlR PE=4 SV=2	-			7.30893e-06			OFF		OFF
CD30090	Q184K0_PEPD6	Putative pyridine nucleotide-disulphide oxidoreductase, class I OS=Peptoclostridium difficile (strain 630) GN=CD30090 PE=4 SV=1	-			7.09375e-06			OFF		OFF
CD28270	Q183R5_PEPD6	Transcriptional regulator, MarR family OS=Peptoclostridium difficile (strain 630) GN=CD28270 PE=4 SV=1	-			6.67546e-06			OFF		OFF
CD17340	Q186U4_PEPD6	Uncharacterized protein OS=Peptoclostridium difficile (strain 630) GN=CD17340 PE=4 SV=1	-			6.44174e-06			OFF		OFF
CD15890	Q186E4_PEPD6	ABC-type transport system, sugar-family extracellular solute-binding protein OS=Peptoclostridium difficile (strain 630) GN=CD15890 PE=4 SV=1	-			6.26071e-06			OFF		OFF
CDp040	Q17ZS7_PEPD6	Putative phage capsid protein OS=Peptoclostridium difficile (strain 630) GN=CDp040 PE=4 SV=1	-			6.11865e-06			OFF		OFF
CD02770	Q18D15_PEPD6	Uncharacterized protein OS=Peptoclostridium difficile (strain 630) GN=CD02770 PE=4 SV=1	-			5.94097e-06			OFF		OFF
CD22720	Q185E4_PEPD6	Uncharacterized protein OS=Peptoclostridium difficile (strain 630) GN=CD22720 PE=4 SV=1	-			5.68542e-06			OFF		OFF
CD18030	Q187B4_PEPD6	Putative cell wall-binding protein cwp23 OS=Peptoclostridium difficile (strain 630) GN=cwp23 PE=4 SV=1	-		5.63406e-06	5.53044e-06			OFF		OFF
CD33750	Q180M2_PEPD6	Magnesium-transporting ATPase protein C Tn916-like, CTn7-Orf10 OS=Peptoclostridium difficile (strain 630) GN=mgtC PE=4 SV=2	-			5.38613e-06			OFF		OFF
CD34360	Q180T3_PEPD6	Cobalamin biosynthesis phosphoglycerate mutase CobC OS=Peptoclostridium difficile (strain 630) GN=cobC PE=4 SV=1	-			5.30244e-06			OFF		OFF
CD06880	Q189N3_PEPD6	Uncharacterized protein OS=Peptoclostridium difficile (strain 630) GN=CD06880 PE=4 SV=1	-			5.26729e-06			OFF		OFF
CD34520	Q180V1_PEPD6	Transcriptional regulator, GntR family OS=Peptoclostridium difficile (strain 630) GN=CD34520 PE=4 SV=1	-			5.24027e-06			OFF		OFF
CD33830	Q180M9_PEPD6	Putative ATPase Tn916-like, CTn7-Orf19 OS=Peptoclostridium difficile (strain 630) GN=CD33830 PE=4 SV=1	-			5.00266e-06			OFF		OFF
CD16850	Q186P4_PEPD6	Putative binding protein OS=Peptoclostridium difficile (strain 630) GN=CD16850 PE=4 SV=1	-			4.94022e-06			OFF		OFF
CD16330	Q186I8_PEPD6	Putative serine protease OS=Peptoclostridium difficile (strain 630) GN=CD16330 PE=4 SV=1	-			4.87326e-06			OFF		OFF
CD10780	Q18AT2_PEPD6	PTS system, mannose/fructose/sorbose IID component OS=Peptoclostridium difficile (strain 630) GN=CD10780 PE=4 SV=1	-			4.53307e-06			OFF		OFF
CD25050	Q182J2_PEPD6	Transcriptional regulator, TetR family OS=Peptoclostridium difficile (strain 630) GN=CD25050 PE=4 SV=1	-			4.08908e-06			OFF		OFF
CD32180	Q17ZW2_PEPD6	Uncharacterized protein OS=Peptoclostridium difficile (strain 630) GN=CD32180 PE=4 SV=1	-			3.87574e-06			OFF		OFF
CD05890	Q189D4_PEPD6	Uncharacterized protein OS=Peptoclostridium difficile (strain 630) GN=CD05890 PE=4 SV=1	-			3.56071e-06			OFF		OFF
CD22710	Q185E2_PEPD6	Transcription antiterminator, PTS operon regulator OS=Peptoclostridium difficile (strain 630) GN=CD22710 PE=4 SV=1	-			3.09362e-06			OFF		OFF
CD02940	Q18D30_PEPD6	ABC-type transport system,bacitracin/multidrug-family permease OS=Peptoclostridium difficile (strain 630) GN=CD02940 PE=4 SV=1	-			2.66516e-06			OFF		OFF
CD12040	Q18B65_PEPD6	Exodeoxyribonuclease 7 small subunit OS=Peptoclostridium difficile (strain 630) GN=xseB PE=3 SV=1	-			2.13787e-06			OFF		OFF
CD29600	Q184E8_PEPD6	V-type ATP synthase subunit I OS=Peptoclostridium difficile (strain 630) GN=atpI PE=3 SV=1	-			2.12681e-06			OFF		OFF
CD17750	Q186Y6_PEPD6	ABC-type transport system, aminoacid-family permease OS=Peptoclostridium difficile (strain 630) GN=CD17750 PE=3 SV=1	-			2.04524e-06			OFF		OFF
CD31540	Q184Z1_PEPD6	Transcriptional regulator, Phage-type OS=Peptoclostridium difficile (strain 630) GN=CD31540 PE=4 SV=1	-			1.85166e-06			OFF		OFF
CD34080	Q180Q6_PEPD6	Putative DNA mismatch repair ATPase MutS OS=Peptoclostridium difficile (strain 630) GN=CD34080 PE=4 SV=2	-			1.51875e-06			OFF		OFF
CD28580	Q183U2_PEPD6	Putative membrane protein OS=Peptoclostridium difficile (strain 630) GN=CD28580 PE=1 SV=1	-			1.49805e-06			OFF		OFF
CD32590	Q180A3_PEPD6	Putative membrane protein OS=Peptoclostridium difficile (strain 630) GN=CD32590 PE=4 SV=1	-			1.18571e-06			OFF		OFF
CD05170	Q188W6_PEPD6	Putative membrane protein OS=Peptoclostridium difficile (strain 630) GN=CD05170 PE=4 SV=2	-			1.1596e-06			OFF		OFF
CD14180	Q18BT5_PEPD6	Putative drug/sodium antiporter, MATE family OS=Peptoclostridium difficile (strain 630) GN=CD14180 PE=4 SV=1	-			8.77955e-07			OFF		OFF
CD23730	Q185P3_PEPD6	Putative CstA-like carbon starvation protein OS=Peptoclostridium difficile (strain 630) GN=CD23730 PE=4 SV=1	-			8.74363e-07			OFF		OFF
CD35760	Q181H8_PEPD6	Transporter, Major Facilitator Superfamily (MFS) OS=Peptoclostridium difficile (strain 630) GN=CD35760 PE=4 SV=1	-			7.93082e-07			OFF		OFF
CD35840	Q181I5_PEPD6	ABC-type transport system, permease OS=Peptoclostridium difficile (strain 630) GN=CD35840 PE=4 SV=1	-			5.1703e-07			OFF		OFF
CD16500	Q186K4_PEPD6	ABC-type transport system, iron-family extracellular substrate-binding protein OS=Peptoclostridium difficile (strain 630) GN=CD16500 PE=4 SV=1	-	0.00599116	0.00413865	1.59921e-05	0.00282346		8.54934	**	7.46396	**
CD14790	Q18BZ8_PEPD6	Ferrous iron transport protein B OS=Peptoclostridium difficile (strain 630) GN=feoB1 PE=4 SV=1	-	0.000996061	0.00403227	3.61641e-05	0.00528693		4.78361	**	7.19173	**
CD05910	Q189D2_PEPD6	Putative ATPase, P-type, heavy metal translocating OS=Peptoclostridium difficile (strain 630) GN=CD05910 PE=3 SV=1	-	0.0013275	0.00104689	7.11051e-06	0.000777719		7.54454	**	6.77315	**
CD14780	Q18BZ9_PEPD6	Ferrous iron transport protein OS=Peptoclostridium difficile (strain 630) GN=feoA1 PE=4 SV=1	-	0.000380431	0.00162377	2.94849e-05	0.00152953		3.68959	**	5.69697	**
CD05920	Q189E0_PEPD6	Uncharacterized protein OS=Peptoclostridium difficile (strain 630) GN=CD05920 PE=4 SV=1	-	0.012049	0.0127125	0.000242404	0.00896217		5.63536	**	5.20837	**
CD03130	Q18D50_PEPD6	Putative K/Mg/Cd/Cu/Zn/Na/Ca/Na/H-transporting P-type ATPase OS=Peptoclostridium difficile (strain 630) GN=CD03130 PE=3 SV=1	-	0.000597875	0.00118888	5.66937e-05	0.0015242		3.39859	**	4.74872	**
CD12800	Q18BE3_PEPD6	Fe-s iron-sulfur cluster assembly protein, nifu family OS=Peptoclostridium difficile (strain 630) GN=CD12800 PE=4 SV=1	-	0.000305398	0.00348606	0.000246171	0.0035003		0.311032		3.82975	**
CD15940	Q186F0_PEPD6	O-acetyl-serine thiol-lyase A (O-acetyl-sulfhydrylase)(OAS-TL) OS=Peptoclostridium difficile (strain 630) GN=cysK PE=4 SV=1	-		0.000380448	1.88093e-05	0.000244329		OFF		3.69931
CD21290	Q185R9_PEPD6	Putative membrane-associated peptidase, M50 family OS=Peptoclostridium difficile (strain 630) GN=CD21290 PE=4 SV=1	-	2.51312e-05	3.33801e-05	3.91914e-06	5.05101e-05		2.68087	**	3.68796	**
CD28490	PHNXW_PEPD6	Bifunctional phosphonoacetaldehyde hydrolase/aminoethylphosphonate transaminase OS=Peptoclostridium difficile	-			1.72658e-06	2.05527e-05		OFF		3.57334	**
CD18220	Q187D3_PEPD6	Putative thiol peroxidase OS=Peptoclostridium difficile (strain 630) GN=bcp PE=4 SV=1	-	5.15535e-05	0.000184755	1.8356e-05	0.000204956		1.48982	**	3.48099	**
CD12780	Q18BD8_PEPD6	Transcriptional regulator, Rrf2 family (Transcriptional regulator of cysteine biosynthesis) OS=Peptoclostridium difficile (strain 630) GN=iscR PE=4 SV=1	-	3.93407e-05	0.000207924	1.45457e-05	0.000143056		1.43543		3.29792	**
CD29900	Q184I0_PEPD6	ABC-type transport system, sulfonate-family ATP-binding protein OS=Peptoclostridium difficile (strain 630) GN=ssuB2 PE=3 SV=1	-	0.000472563	0.000305804	1.68521e-05	0.000143092		4.80951	**	3.08594	**
CD05800	Q189C4_PEPD6	Glyceraldehyde-3-phosphate dehydrogenase (NADP(+)) (GADPH) OS=Peptoclostridium difficile (strain 630) GN=gapN PE=3 SV=1	-	0.000132272	0.000188443	2.5225e-05	0.000164214		2.39058	**	2.70265
CD12790	Q18BE4_PEPD6	Cysteine desulfurase IscS OS=Peptoclostridium difficile (strain 630) GN=iscS2 PE=3 SV=1	-	0.000829428	0.00922854	0.000814727	0.00526953		0.0258003		2.69329	**
CD31450	Q184Y2_PEPD6	Putative serine-aspartate repeat-containing protein SdrF OS=Peptoclostridium difficile (strain 630) GN=CD31450 PE=4 SV=1	-	5.24929e-07	3.00499e-06	1.5493e-06	9.14512e-06		-1.56142		2.56139	**
CD19430	Q187Q3_PEPD6	Uncharacterised protein OS=Peptoclostridium difficile (strain 630) GN=CD19430 PE=4 SV=1	-	5.54869e-05	0.000282959	3.49653e-05	0.000203507		0.666225		2.54108
CD29890	Q184I1_PEPD6	ABC-type transport system, sulfonate-family extracellular solute-binding protein OS=Peptoclostridium difficile (strain 630) GN=ssuA2 PE=4 SV=1	-	0.00421542	0.00330595	0.00031715	0.00177601		3.73244	**	2.4854	**
CD28780	Q183W4_PEPD6	ABC-type transport system, ferrichrome-specific extracellular solute-binding protein OS=Peptoclostridium difficile (strain 630) GN=fhuD PE=4 SV=1	-	0.000849736	0.000712026	3.83812e-05	0.000206451		4.46854	**	2.42733	**
CD08920	Q18A83_PEPD6	Cold shock protein OS=Peptoclostridium difficile (strain 630) GN=cspA PE=4 SV=1	-	0.00015618	0.000137149	5.536e-05	0.000270472		1.49629		2.28856	**
CD05820	Q189C8_PEPD6	Putative pyruvate phosphate dikinase,PEP/pyruvate-binding OS=Peptoclostridium difficile (strain 630) GN=CD05820 PE=4 SV=2	-	4.82643e-06	6.11817e-06	4.00513e-06	1.86316e-05		0.26911		2.21783	**
CD29270	Q184B4_PEPD6	Transcriptional regulator, Phage-type OS=Peptoclostridium difficile (strain 630) GN=CD29270 PE=4 SV=2	-	1.28541e-05	1.49986e-05	3.36157e-06	1.54791e-05		1.93503	**	2.20312
CD21480	Q185T5_PEPD6	Putative serine/threonine protein kinase OS=Peptoclostridium difficile (strain 630) GN=CD21480 PE=4 SV=2	-	7.771e-06	1.09261e-05	3.23037e-06	1.43075e-05		1.2664	**	2.147	**
CD27640	Q183K1_PEPD6	Putative hydrolase, HAD superfamily, IIB subfamily OS=Peptoclostridium difficile (strain 630) GN=CD27640 PE=4 SV=1	-	3.34208e-05	2.9192e-05	1.01017e-05	4.12657e-05		1.72615	**	2.03035	**
CD14690	Q18BY9_PEPD6	Putative cell surface protein putative penicillin-binding protein cwp20 OS=Peptoclostridium difficile (strain 630) GN=cwp20 PE=4 SV=1	-	3.85377e-05	3.50564e-05	1.57345e-05	6.425e-05		1.29234		2.02976	**
CD36700	Q181S2_PEPD6	Putative cysteine desulfurase family protein OS=Peptoclostridium difficile (strain 630) GN=CD36700 PE=3 SV=1	-	0.000172059	0.000121151	2.31306e-05	9.28511e-05		2.89503	**	2.00511
CD35680	Q181H0_PEPD6	Uncharacterized protein OS=Peptoclostridium difficile (strain 630) GN=CD35680 PE=4 SV=1	-	4.32904e-05	5.53095e-05	1.06625e-05	4.21351e-05		2.02151	**	1.98248	**
CD08840	GLGA_PEPD6	Glycogen synthase OS=Peptoclostridium difficile (strain 630) GN=glgA PE=3 SV=1	-	7.77059e-05	0.000224162	0.00010052	0.000395971		-0.371385		1.97791
CD21660	Q185V3_PEPD6	Peptide methionine sulfoxide reductase MsrA/MsrB OS=Peptoclostridium difficile (strain 630) GN=msrAB PE=3 SV=1	-	3.53688e-05	0.000142643	2.1218e-05	8.2772e-05		0.737189		1.96386
CD16900	Q186P6_PEPD6	Thioredoxin OS=Peptoclostridium difficile (strain 630) GN=trxA PE=3 SV=1	-	0.00032428	0.00106306	0.000195769	0.000762877		0.728085	**	1.9623	**
CD14040	Q18BS3_PEPD6	Putative oligopeptide transporter OS=Peptoclostridium difficile (strain 630) GN=CD14040 PE=4 SV=1	-	5.11322e-06	1.89505e-05	1.58655e-06	6.04364e-06		1.68834		1.92953	**
CD02350	Q18CX2_PEPD6	Flagellar protein FliS1 OS=Peptoclostridium difficile (strain 630) GN=fliS1 PE=4 SV=1	-	0.000247628	0.000238806	6.66277e-05	0.000250382		1.89398	**	1.90994	**
CD08750	Q18A67_PEPD6	ABC-type transport system, sugar-family permease OS=Peptoclostridium difficile (strain 630) GN=CD08750 PE=4 SV=1	-	0.000432846	0.000732855	0.000221134	0.000822136		0.968931	**	1.89445	**
CD11250	Q18AY4_PEPD6	Nitroreductase-family protein OS=Peptoclostridium difficile (strain 630) GN=CD11250 PE=4 SV=1	-	0.000658136	0.00188316	0.000378703	0.00126943		0.797319	**	1.74504	**
CD22690	Q185E0_PEPD6	PTS system, fructose-specific IIABC component OS=Peptoclostridium difficile (strain 630) GN=fruABC PE=4 SV=1	-	5.18876e-06		1.3765e-06	4.53357e-06		1.91438		1.71964
CD10110	NAGB_PEPD6	Glucosamine-6-phosphate deaminase OS=Peptoclostridium difficile (strain 630) GN=nagB PE=3 SV=1	-	0.000136906	9.80852e-05	0.000120353	0.00038887		0.185914		1.69202
CD28170	Q183Q0_PEPD6	ABC-type transport system, multidrug-family ATP-binding/permease protein OS=Peptoclostridium difficile (strain 630) GN=CD28170 PE=3 SV=1	-	1.88762e-05	6.06967e-06	8.15182e-06	2.6116e-05		1.21138	**	1.67974
CD16910	Q186P9_PEPD6	Putative thioredoxin-disulfide reductase OS=Peptoclostridium difficile (strain 630) GN=trxB PE=4 SV=1	-	0.000202865	0.000347522	9.81924e-05	0.000310985		1.04684	**	1.66316	**
CD02370	Q18CX9_PEPD6	Flagellar hook-associated protein 2 FliD (Or HAP2) OS=Peptoclostridium difficile (strain 630) GN=fliD PE=4 SV=1	-	0.000177384	0.000384352	0.000144397	0.000454002		0.296837		1.65266	**
CD08740	Q18A68_PEPD6	ABC-type transport system, sugar-family ATP-binding protein OS=Peptoclostridium difficile (strain 630) GN=CD08740 PE=4 SV=1	-	0.00156951	0.00240132	0.00101478	0.00303626		0.62915	**	1.58113	**
CD02310	Q18CW5_PEPD6	Flagellar hook-associated protein FlgK (Or HAP1) OS=Peptoclostridium difficile (strain 630) GN=flgK PE=4 SV=1	-	8.29004e-05	0.000104656	7.84671e-05	0.000234431		0.0792918		1.579	**
CD02551	Q18CZ3_PEPD6	Flagellar protein FlbD OS=Peptoclostridium difficile (strain 630) GN=FlbD PE=4 SV=1	-	5.42913e-05	7.28477e-05	2.89685e-05	8.53736e-05		0.906238		1.55931
CD00560	Q18CD9_PEPD6	Putative ribonuclease OS=Peptoclostridium difficile (strain 630) GN=CD00560 PE=4 SV=1	-	0.000609801	1.29523e-05	5.78096e-06	1.64984e-05		6.72089		1.51295
CD24760	Q182G3_PEPD6	Gnat family acetyltransferase OS=Peptoclostridium difficile (strain 630) GN=CD24760 PE=4 SV=1	-	7.48179e-05	0.000109832	3.0094e-05	8.4714e-05		1.31391	**	1.49313	**
CD23590	Q185N0_PEPD6	Putative hydrolase, HAD superfamily, subfamily IIB OS=Peptoclostridium difficile (strain 630) GN=CD23590 PE=4 SV=1	-	0.000218625	0.000280905	0.00010441	0.000293612		1.0662	**	1.49166	**
CD17090	Q186R9_PEPD6	Probable molybdenum cofactor guanylyltransferase OS=Peptoclostridium difficile (strain 630) GN=mobA PE=3 SV=1	-	3.63288e-05	5.54665e-05	2.3981e-05	6.50763e-05		0.599224		1.44024	**
CD35650	Q181G5_PEPD6	Transcriptional regulator, GntR family OS=Peptoclostridium difficile (strain 630) GN=CD35650 PE=4 SV=1	-	9.89065e-05	4.89842e-05	3.64966e-05	9.86376e-05		1.4383	**	1.43437
CD20200	Q187Y8_PEPD6	Chaperone protein OS=Peptoclostridium difficile (strain 630) GN=clpB PE=3 SV=1	-	0.000686718	0.000523099	0.000143461	0.000387029		2.25906	**	1.43178	**
CD17770	Q186Z0_PEPD6	Putative arsenate reductase OS=Peptoclostridium difficile (strain 630) GN=CD17770 PE=4 SV=1	-	0.000106168	0.00017556	4.31809e-05	0.000113956		1.29788	**	1.40001	**
CD20760	Q188E4_PEPD6	Uncharacterized protein OS=Peptoclostridium difficile (strain 630) GN=CD20760 PE=4 SV=1	-	1.61147e-05	1.50398e-05	9.09915e-06	2.36694e-05		0.824574		1.37922
CD13910	Q18BR1_PEPD6	Putative hydrolase, CocE/NonD family OS=Peptoclostridium difficile (strain 630) GN=CD13910 PE=4 SV=1	-	4.04553e-05	6.78928e-05	3.19597e-05	8.13876e-05		0.340074		1.34855	**
CD32330	Q17ZX8_PEPD6	Putative sigma-54 interacting protein OS=Peptoclostridium difficile (strain 630) GN=CD32330 PE=4 SV=1	-	3.01296e-05	3.07351e-05	1.56485e-05	3.98072e-05		0.945162		1.34701
CD30640	Q184Q2_PEPD6	Xylose isomerase OS=Peptoclostridium difficile (strain 630) GN=xylA PE=3 SV=1	-	4.2189e-05	5.56918e-05	2.11171e-05	5.27986e-05		0.998456		1.32209	**
CD31920	Q181V6_PEPD6	Putative cell surface peptidase, M4 family-cwp20 OS=Peptoclostridium difficile (strain 630) GN=cwp21 PE=4 SV=1	-	2.26633e-05	3.15143e-05	1.77279e-05	4.40085e-05		0.354331		1.31176	**
CD02380	Q18CX8_PEPD6	Uncharacterized protein OS=Peptoclostridium difficile (strain 630) GN=CD02380 PE=4 SV=1	-	1.61817e-05	3.48315e-05	2.39356e-05	5.91479e-05		-0.564797		1.30517	**
CD30680	Q184Q6_PEPD6	PTS system, xyloside-specific IIB component OS=Peptoclostridium difficile (strain 630) GN=xynB PE=4 SV=1	-	0.000116179	0.000229241	4.64463e-05	0.000114056		1.32271	**	1.2961	**
CD34560	Q180V5_PEPD6	5-formyltetrahydrofolate cyclo-ligase OS=Peptoclostridium difficile (strain 630) GN=CD34560 PE=4 SV=1	-	1.79305e-05	6.72142e-05	1.79412e-05	4.39425e-05		-0.000862216		1.29234
CD22700	Q185E1_PEPD6	Tagatose-6-phosphate kinase OS=Peptoclostridium difficile (strain 630) GN=fruK PE=3 SV=1	-	1.60065e-05	3.34876e-05	5.85329e-06	1.41642e-05		1.45134		1.27494
CD18410	Q187F1_PEPD6	Two-component sensor histidine kinase OS=Peptoclostridium difficile (strain 630) GN=CD18410 PE=4 SV=1	-	7.95112e-06	6.21857e-06	6.45896e-06	1.54548e-05		0.299858		1.25868
CD15220	Q18C42_PEPD6	Putative polysaccharide deacetylase OS=Peptoclostridium difficile (strain 630) GN=CD15220 PE=4 SV=1	-	3.49709e-05	0.000130739	7.05221e-05	0.000167702		-1.01192		1.24975
CD13300	Q18BJ7_PEPD6	Putative DNA helicase, UvrD/REP type OS=Peptoclostridium difficile (strain 630) GN=CD13300 PE=4 SV=1	-	0.000148207	0.000145927	8.03874e-05	0.000187914		0.882574		1.22503	**
CD22130	Q186A4_PEPD6	Carbonic anhydrase OS=Peptoclostridium difficile (strain 630) GN=cynT PE=4 SV=2	-	0.000220449	0.000269993	0.000126382	0.000294776		0.802649	**	1.22182	**
CD36690	Q181S4_PEPD6	Putative exported protein OS=Peptoclostridium difficile (strain 630) GN=CD36690 PE=4 SV=1	-	0.000536813	0.000875128	0.000457992	0.00105955		0.229098		1.21006	**
CD08440	Q18A40_PEPD6	Putative cell wall-binding protein cwp25 OS=Peptoclostridium difficile (strain 630) GN=cwp25 PE=4 SV=1	-	0.000194604	0.000408102	0.000167661	0.000386935		0.214994		1.20655	**
CD02290	Q18CW7_PEPD6	Negative regulator of flagellin synthesis (Anti-sigma-d factor) OS=Peptoclostridium difficile (strain 630) GN=flgM PE=4 SV=1	-		1.0762e-05	6.10725e-06	1.39215e-05		OFF		1.18872
CD12870	Q18BE9_PEPD6	Transcriptional regulator, Fur family OS=Peptoclostridium difficile (strain 630) GN=fur PE=4 SV=1	-	0.000163884	4.52515e-05	0.000119193	0.00026734		0.459376		1.16538	**
CD27260	GLYA_PEPD6	Serine hydroxymethyltransferase OS=Peptoclostridium difficile (strain 630) GN=glyA PE=3 SV=1	-	0.000447193	0.00113401	0.000480482	0.00107137		-0.103585		1.1569	**
CD02530	Q18CZ6_PEPD6	Flagellar hook-length control protein FliK OS=Peptoclostridium difficile (strain 630) GN=fliK PE=4 SV=1	-	1.20652e-05	1.03114e-05	4.69336e-06	1.04506e-05		1.36215	**	1.15489
CD17010	Q186Q8_PEPD6	ATP-dependent DNA helicase OS=Peptoclostridium difficile (strain 630) GN=recQ PE=4 SV=1	-	1.13574e-05	3.96748e-05	8.83791e-06	1.9507e-05		0.36185		1.14222	**
CD21150	Q185Q4_PEPD6	Putative copper-transporting P-type ATPase OS=Peptoclostridium difficile (strain 630) GN=CD21150 PE=3 SV=1	-	1.03649e-05	1.56354e-05	5.86781e-06	1.29239e-05		0.820811	**	1.13914	**
CD14760	Q18BZ5_PEPD6	Putative signaling protein OS=Peptoclostridium difficile (strain 630) GN=CD14760 PE=4 SV=1	-	4.50878e-06	5.71486e-06	3.46492e-06	7.54734e-06		0.379916		1.12315
CD24020	Q181Y8_PEPD6	Putative cell wall hydrolase phosphatase-associated protein OS=Peptoclostridium difficile (strain 630) GN=CD24020 PE=4 SV=1	-	2.57478e-05	1.0121e-05	6.84177e-06	1.48981e-05		1.91201	**	1.12269
CD17030	Q186R2_PEPD6	Thiamine biosynthesis protein ThiF OS=Peptoclostridium difficile (strain 630) GN=thiF PE=4 SV=1	-		7.32225e-05	4.6164e-05	0.000100134		OFF		1.1171	**
CD28230	Q183R2_PEPD6	Uncharacterized protein OS=Peptoclostridium difficile (strain 630) GN=CD28230 PE=4 SV=1	-	1.34452e-05	5.08328e-05	1.86089e-05	4.02372e-05		-0.468906		1.11254
CD33960	Q180P3_PEPD6	DNA polymerase III DnaE subunit alpha OS=Peptoclostridium difficile (strain 630) GN=dnaE PE=4 SV=1	-	6.2258e-05	9.30647e-05	5.57526e-05	0.000120199		0.15922		1.10831	**
CD29950	Q184I5_PEPD6	Ribonucleoside-diphosphate reductase OS=Peptoclostridium difficile (strain 630) GN=nrdE PE=3 SV=1	-	0.000189253	0.000108213	4.69683e-05	0.00010107		2.01056	**	1.10559	**
CD28790	Q183W3_PEPD6	Uncharacterized protein OS=Peptoclostridium difficile (strain 630) GN=CD28790 PE=4 SV=1	-	0.000503402	0.000454238	8.95821e-05	0.000191631		2.49043	**	1.09705	**
CD17360	Q186U2_PEPD6	Transcriptional regulator, HTH-type OS=Peptoclostridium difficile (strain 630) GN=CD17360 PE=4 SV=1	-	4.91216e-06	8.44792e-06	4.17637e-06	8.93078e-06		0.234109		1.09654
CD01080	Q18CJ6_PEPD6	Anaerobic ribonucleoside triphosphate reductase OS=Peptoclostridium difficile (strain 630) GN=nrdD PE=4 SV=1	-	0.000930908	0.0013819	0.000706238	0.00149687		0.398484	**	1.08372	**
CD27970	Q183N3_PEPD6	Putative calcium-binding adhesion protein OS=Peptoclostridium difficile (strain 630) GN=CD27970 PE=4 SV=1	-	0.0003216	0.000271084	0.000140666	0.000297269		1.19299	**	1.07949
CD12470	Q18BA8_PEPD6	Uncharacterised protein OS=Peptoclostridium difficile (strain 630) GN=CD12470 PE=4 SV=1	-	7.69112e-05	0.000185132	0.000140817	0.000297586		-0.872557	**	1.07948	**
CD18280	Q187D7_PEPD6	ATP-dependent zinc metalloprotease FtsH OS=Peptoclostridium difficile (strain 630) GN=ftsH1 PE=3 SV=1	-	0.000199108	0.000157682	7.79714e-05	0.000163976		1.35253	**	1.07247	**
CD29920	Q184I4_PEPD6	Uncharacterized protein OS=Peptoclostridium difficile (strain 630) GN=CD29920 PE=4 SV=1	-	0.000986162	7.17177e-05	1.73222e-05	3.63772e-05		5.83113	**	1.07041	**
CD02460	Q18CY6_PEPD6	Flagellar basal-body rod protein FlgC OS=Peptoclostridium difficile (strain 630) GN=flgC PE=4 SV=1	-	1.17799e-05	1.13545e-05	8.14449e-06	1.70472e-05		0.532431	**	1.06563	**
CD21490	Q185T7_PEPD6	Putative vancomycin resistance protein, vanW family OS=Peptoclostridium difficile (strain 630) GN=CD21490 PE=4 SV=1	-	0.00042781	0.000216066	0.000183385	0.000382443		1.2221	**	1.06037	**
CD03500	Q18D90_PEPD6	Putative hydrolase, HAD superfamily OS=Peptoclostridium difficile (strain 630) GN=CD03500 PE=4 SV=1	-	0.000146999	0.000107473	5.76697e-05	0.000119536		1.34992	**	1.05156	**
CD12090	Q18B72_PEPD6	DNA repair protein RecN OS=Peptoclostridium difficile (strain 630) GN=recN PE=3 SV=1	-	1.83268e-05	1.61103e-05	2.28288e-05	4.731e-05		-0.316896		1.05129
CD02640	Q18D08_PEPD6	Flagellar biosynthesis regulator FlhF (Flagella-associated GTP-binding protein) OS=Peptoclostridium difficile (strain 630) GN=flhF PE=4 SV=1	-	0.000106125	0.000124473	4.31951e-05	8.90846e-05		1.29682	**	1.04431
CD31710	GPMI_PEPD6	2,3-bisphosphoglycerate-independent phosphoglycerate mutase OS=Peptoclostridium difficile (strain 630) GN=gpmI PE=3 SV=1	-	0.000540196	0.000814562	0.000392918	0.00080961		0.459255	**	1.043	**
CD04280	Q188L4_PEPD6	Transcriptional regulator, AraC family Tn1549-like, CTn2-Orf23 OS=Peptoclostridium difficile (strain 630) GN=CD04280 PE=4 SV=2	-	3.28499e-05	4.2896e-05	1.62781e-05	3.25632e-05		1.01295	**	1.00031
CD04960	Q188T8_PEPD6	Putative conjugative transposon protein DUF961 family Tn5397, CTn3-Orf23 OS=Peptoclostridium difficile (strain 630) GN=CD04960 PE=4 SV=1	-		4.34808e-05	3.4006e-05	6.79781e-05		OFF		0.999281	**
CD00260	Q18CA9_PEPD6	Class III stress response-related ATPase, AAA+ superfamily OS=Peptoclostridium difficile (strain 630) GN=clpC PE=1 SV=1	-	0.00104527	0.000479548	0.000271658	0.000540105		1.94402	**	0.991447	**
CD17690	Q186X9_PEPD6	Putative CoA enzyme activase OS=Peptoclostridium difficile (strain 630) GN=CD17690 PE=4 SV=1	-	8.29563e-05	5.96107e-05	4.80354e-05	9.4947e-05		0.788255	**	0.983026	**
CD05950	Q189D7_PEPD6	Putative nuclease, ParB-like OS=Peptoclostridium difficile (strain 630) GN=CD05950 PE=4 SV=1	-	3.7507e-05	4.00885e-05	2.35482e-05	4.65407e-05		0.671546	**	0.982877	**
CD18760	Q187I9_PEPD6	Two-component response regulator Tn1549-like,CTn5-Orf36 OS=Peptoclostridium difficile (strain 630) GN=vncR PE=4 SV=1	-			6.48942e-05	0.000127922		OFF		0.979108
CD20620	Q188C9_PEPD6	Uncharacterized protein OS=Peptoclostridium difficile (strain 630) GN=CD20620 PE=4 SV=1	-	0.000116113	0.000132176	7.13309e-05	0.000140411		0.702929		0.977056	**
CD18040	Q187B3_PEPD6	Transcriptional regulator, LacI family OS=Peptoclostridium difficile (strain 630) GN=scrR PE=4 SV=1	-	9.5409e-06	3.68609e-05	1.35197e-05	2.63998e-05		-0.502865		0.965466
CD35530	GREA_PEPD6	Transcription elongation factor GreA OS=Peptoclostridium difficile (strain 630) GN=greA PE=3 SV=1	-	0.000657485	0.000578434	0.00046465	0.000906935		0.500815	**	0.964856	**
CD29940	Q184I6_PEPD6	Ribonucleoside-diphosphate reductase subunit beta OS=Peptoclostridium difficile (strain 630) GN=nrdF PE=3 SV=1	-	4.40692e-05	2.22468e-05	1.36181e-05	2.65221e-05		1.69424	**	0.961667	**
CD28570	Q183U3_PEPD6	Putative hydrolase, HAD superfamily, IA subfamily OS=Peptoclostridium difficile (strain 630) GN=CD28570 PE=4 SV=1	-	3.64919e-05	8.91739e-05	5.16608e-05	0.000100323		-0.501493		0.957508	**
CD05940	Q189D8_PEPD6	Uncharacterized protein OS=Peptoclostridium difficile (strain 630) GN=CD05940 PE=4 SV=1	-	2.83703e-05	3.20138e-05	1.55489e-05	3.00516e-05		0.867569		0.950628
CD13890	Q18BQ6_PEPD6	Putative chloromuconate cycloisomerase OS=Peptoclostridium difficile (strain 630) GN=CD13890 PE=4 SV=1	-	7.75236e-05	0.000142441	4.25418e-05	8.18817e-05		0.865755	**	0.944662
CD28180	Q183Q4_PEPD6	ABC-type transport system, multidrug-family ATP-binding/permease protein OS=Peptoclostridium difficile (strain 630) GN=CD28180 PE=3 SV=2	-	0.000230545	0.000113175	5.26285e-05	0.00010119		2.13113	**	0.943153	**
CD18680	Q187H8_PEPD6	Putative conjugative transposon protein Tn1549-like, CTn5-Orf27 OS=Peptoclostridium difficile (strain 630) GN=CD18680 PE=4 SV=1	-	1.7288e-05		1.58926e-05	3.05426e-05		0.121418		0.94247
CD26220	SEPF_PEPD6	Cell division protein SepF OS=Peptoclostridium difficile (strain 630) GN=sepF PE=3 SV=1	-	0.000124437	0.000129587	4.95617e-05	9.48266e-05		1.32811	**	0.936065
CD14740	Q18BZ4_PEPD6	Putative rubrerythrin (Rr) OS=Peptoclostridium difficile (strain 630) GN=CD14740 PE=4 SV=1	-	0.00405117	0.00426779	0.00269675	0.00514844		0.587117	**	0.932913	**
CD02300	Q18CW6_PEPD6	Putative flagellar biosynthesis protein OS=Peptoclostridium difficile (strain 630) GN=CD02300 PE=4 SV=1	-	6.44555e-05	5.24369e-05	3.94697e-05	7.48866e-05		0.707557		0.923961
CD22170	AROD_PEPD6	3-dehydroquinate dehydratase OS=Peptoclostridium difficile (strain 630) GN=aroD PE=1 SV=2	-	2.47303e-05	2.29788e-05	2.81062e-05	5.3212e-05		-0.184604		0.920866
CD21900	Q185X6_PEPD6	Cyclomaltodextrinase (Maltogenic alpha-amylase) (Cyclomaltodextrin dextrin-hydrolase (Decyclizing)) OS=Peptoclostridium difficile (strain 630) GN=CD21900 PE=4 SV=1	-	3.52064e-05	2.73748e-05	3.84717e-05	7.21867e-05		-0.127961		0.907935	**
CD31700	ENO_PEPD6	Enolase OS=Peptoclostridium difficile (strain 630) GN=eno PE=3 SV=1	-	0.00469622	0.00880765	0.00406753	0.00759341		0.207346		0.900594	**
CD15650	ILVC_PEPD6	Ketol-acid reductoisomerase OS=Peptoclostridium difficile (strain 630) GN=ilvC PE=3 SV=1	-	1.52471e-05	1.04639e-05	6.57938e-06	1.22556e-05		1.21251	**	0.897419
CD17280	Q186T6_PEPD6	Uncharacterised protein OS=Peptoclostridium difficile (strain 630) GN=CD17280 PE=4 SV=1	-			9.42818e-06	1.74133e-05		OFF		0.885136
CD00170	Y017_PEPD6	Nucleoid-associated protein CD00170 OS=Peptoclostridium difficile (strain 630) GN=CD00170 PE=3 SV=1	-	0.000306158	0.000271411	0.000188105	0.000346947		0.702736		0.883173	**
CD08260	Q18A23_PEPD6	Putative ferric-uptake regulator OS=Peptoclostridium difficile (strain 630) GN=CD08260 PE=4 SV=1	-	0.00135874	0.000357214	0.000336549	0.000616123		2.01338	**	0.872401
CD05570	Q189A1_PEPD6	Putative uridine kinase OS=Peptoclostridium difficile (strain 630) GN=CD05570 PE=4 SV=1	-	6.05062e-05	5.50539e-05	4.61759e-05	8.45114e-05		0.389943		0.872007
CD00520	SYC_PEPD6	Cysteine--tRNA ligase OS=Peptoclostridium difficile (strain 630) GN=cysS PE=3 SV=2	-	0.000690867	0.00102877	0.000598174	0.00108933		0.207844		0.864805	**
CD19770	MUTS_PEPD6	DNA mismatch repair protein MutS OS=Peptoclostridium difficile (strain 630) GN=mutS PE=3 SV=2	-	0.000115319	0.000100021	7.44975e-05	0.000134759		0.630363		0.855121
CD09930	Q18AJ5_PEPD6	Putative thioesterase OS=Peptoclostridium difficile (strain 630) GN=CD09930 PE=4 SV=1	-	3.19435e-05	4.73215e-05	1.99471e-05	3.5973e-05		0.679348		0.850738
CD27680	Q183K6_PEPD6	Putative cell-wall hydrolase OS=Peptoclostridium difficile (strain 630) GN=CD27680 PE=4 SV=1	-	5.05581e-05	5.43568e-05	3.1528e-05	5.66208e-05		0.681309		0.844699
CD31720	Q181T6_PEPD6	Triosephosphate isomerase OS=Peptoclostridium difficile (strain 630) GN=tpi PE=3 SV=1	-	0.00150344	0.00277622	0.00136697	0.00245329		0.137287		0.843731	**
CD33040	CLPX_PEPD6	ATP-dependent Clp protease ATP-binding subunit ClpX OS=Peptoclostridium difficile (strain 630) GN=clpX PE=3 SV=1	-	0.00132012	0.00135154	0.000772963	0.001383		0.772196	**	0.83933	**
CD14710	Q18BZ0_PEPD6	Putative membrane protein OS=Peptoclostridium difficile (strain 630) GN=CD14710 PE=4 SV=1	-	3.31786e-05	2.20683e-05	4.04237e-05	7.16903e-05		-0.284945		0.826579
CD35920	Q181J5_PEPD6	Orotidine 5'-phosphate decarboxylase OS=Peptoclostridium difficile (strain 630) GN=pyrF PE=3 SV=1	-	0.000309454	0.000483856	0.00021165	0.000374513		0.548044	**	0.823334
CD01850	Q18CS7_PEPD6	Dihydroorotate dehydrogenase electron transfer subunit OS=Peptoclostridium difficile (strain 630) GN=pyrK PE=3 SV=1	-	0.00035204	0.000489516	0.000210517	0.000372496		0.741806	**	0.823292	**
CD27790	Q183L6_PEPD6	Putative mannose-1-phosphate guanylyltransferase OS=Peptoclostridium difficile (strain 630) GN=manC PE=4 SV=1	-	9.7071e-05	0.000110125	7.70298e-05	0.000135321		0.333624		0.812897	**
CD36410	Q181P3_PEPD6	Uncharacterized protein OS=Peptoclostridium difficile (strain 630) GN=CD36410 PE=4 SV=1	-	4.21355e-05	9.88476e-05	3.82232e-05	6.69282e-05		0.140587		0.808166
CD14430	Q18BW2_PEPD6	Putative Ca++-chelating serine protease,SCP-like extracellular domain protein OS=Peptoclostridium difficile (strain 630) GN=CD14430 PE=4 SV=1	-	8.63165e-06	2.20761e-05	1.65063e-05	2.88355e-05		-0.935306	**	0.804829
CD33550	Q180K0_PEPD6	Putative nitroreductase OS=Peptoclostridium difficile (strain 630) GN=CD33550 PE=1 SV=1	-	4.00802e-05	9.77912e-05	4.21657e-05	7.36048e-05		-0.0731793		0.803731	**
CD23110	Q185I4_PEPD6	ABC-type transport system, molybdenum-like extracellular solute-binding protein OS=Peptoclostridium difficile (strain 630) GN=CD23110 PE=4 SV=1	-		4.23371e-05	4.85562e-06	8.47069e-06		OFF		0.802825
CD15500	HIS7_PEPD6	Imidazoleglycerol-phosphate dehydratase OS=Peptoclostridium difficile (strain 630) GN=hisB PE=3 SV=1	-	8.809e-05	7.82369e-05	8.36635e-05	0.000145545		0.0743802		0.798794	**
CD25920	Q182T2_PEPD6	Fibronectin-binding protein A OS=Peptoclostridium difficile (strain 630) GN=fbpA PE=4 SV=1	-	0.000101472	0.000109486	7.62135e-05	0.0001324		0.41297		0.796788	**
CD25850	Q182S4_PEPD6	Peptide deformylase OS=Peptoclostridium difficile (strain 630) GN=def PE=3 SV=1	-	4.66054e-05	6.08531e-05	4.06012e-05	7.0302e-05		0.198976		0.792043
CD36580	RL9_PEPD6	50S ribosomal protein L9 OS=Peptoclostridium difficile (strain 630) GN=rplI PE=3 SV=1	-	0.000892105	0.0011582	0.000577569	0.000999536		0.627219	**	0.791265	**
CD09050	Q18A99_PEPD6	Putative phage protein OS=Peptoclostridium difficile (strain 630) GN=CD09050 PE=4 SV=1	-	7.47004e-06	3.25556e-05	1.45613e-05	2.51837e-05		-0.962946		0.790358	**
CD06720	Q189L6_PEPD6	Uncharacterized protein OS=Peptoclostridium difficile (strain 630) GN=CD06720 PE=4 SV=1	-	0.00184825	0.00212066	0.00148219	0.00255659		0.318434		0.786495	**
CD05160	Q188W2_PEPD6	Transcription antiterminator OS=Peptoclostridium difficile (strain 630) GN=CD05160 PE=4 SV=1	-	1.16791e-05	2.00207e-05	1.00108e-05	1.72644e-05		0.222374		0.786247
CD15190	Q18C37_PEPD6	Putative acyltransferase OS=Peptoclostridium difficile (strain 630) GN=CD15190 PE=4 SV=1	-	0.000121782	0.000100175	7.16736e-05	0.000123469		0.76479	**	0.784639	**
CD34110	Q180Q9_PEPD6	UvrABC system protein A OS=Peptoclostridium difficile (strain 630) GN=uvrA PE=3 SV=1	-	0.00031025	0.000208041	0.000161845	0.000278391		0.938819		0.782501
CD02690	Q18D04_PEPD6	Flagellar basal body rod protein FlgG OS=Peptoclostridium difficile (strain 630) GN=flgG PE=4 SV=1	-		2.98382e-05	1.54681e-05	2.6594e-05		OFF		0.781805	**
CD02260	Q18CX0_PEPD6	Putative lytic transglycosylase OS=Peptoclostridium difficile (strain 630) GN=CD02260 PE=4 SV=1	-	3.05433e-05	9.50112e-06	7.86885e-06	1.34994e-05		1.95663	**	0.778668
CD32850	G6PI_PEPD6	Glucose-6-phosphate isomerase OS=Peptoclostridium difficile (strain 630) GN=pgi PE=3 SV=1	-	0.00167569	0.00220327	0.00122669	0.00210297		0.449982		0.777653	**
CD24340	Q182C1_PEPD6	Uncharacterised protein OS=Peptoclostridium difficile (strain 630) GN=CD24340 PE=4 SV=1	-	0.000329964	0.000525191	0.000297086	0.00050703		0.151424		0.77119	**
CD33650	Q180L1_PEPD6	Putative diguanylate kinase signaling protein OS=Peptoclostridium difficile (strain 630) GN=CD33650 PE=4 SV=1	-	1.03872e-05	4.55495e-05	1.62249e-05	2.76508e-05		-0.6434	**	0.769114
CD03090	Q18D48_PEPD6	Putative hydrolase, HAD superfamily, subfamily IB OS=Peptoclostridium difficile (strain 630) GN=CD03090 PE=4 SV=1	-	9.59392e-05	6.42046e-05	7.08398e-05	0.0001205		0.43756		0.766402	**
CD18980	Q187L1_PEPD6	Putative phage-related cell wall hydrolase (Endolysin) OS=Peptoclostridium difficile (strain 630) GN=CD18980 PE=4 SV=1	-	0.000145742	0.000483667	0.000207977	0.000352597		-0.513006		0.761597	**
CD13840	Y1384_PEPD6	UPF0271 protein CD13840 OS=Peptoclostridium difficile (strain 630) GN=CD13840 PE=3 SV=1	-	0.000221155	0.000178769	0.000115325	0.000194511		0.939351	**	0.754144	**
CD31730	PGK_PEPD6	Phosphoglycerate kinase OS=Peptoclostridium difficile (strain 630) GN=pgk PE=3 SV=1	-	0.0022764	0.00407398	0.00148597	0.00249319		0.61535		0.746585
CD30100	Q184J9_PEPD6	Putative cytochrome C assembly protein OS=Peptoclostridium difficile (strain 630) GN=CD30100 PE=4 SV=1	-	1.49528e-06	1.70917e-06	2.80357e-06	4.69392e-06		-0.906854		0.743528
CD27550	Q183J1_PEPD6	Phosphoenolpyruvate-protein phosphotransferase OS=Peptoclostridium difficile (strain 630) GN=ptsI PE=3 SV=1	-	0.00394551	0.00454666	0.00301243	0.00501383		0.389281		0.734983	**
CD14960	Q18C18_PEPD6	Uncharacterised protein OS=Peptoclostridium difficile (strain 630) GN=CD14960 PE=4 SV=1	-	0.00027192	0.000252648	0.000223734	0.000371958		0.281399		0.733357	**
CD03330	Q18D73_PEPD6	Putative inorganic pyrophosphatase OS=Peptoclostridium difficile (strain 630) GN=ppaC PE=4 SV=1	-	0.00136762	0.00183963	0.0011319	0.00188109		0.272921		0.732821
CD21140	Q185Q1_PEPD6	Two-component response regulator OS=Peptoclostridium difficile (strain 630) GN=CD21140 PE=4 SV=1	-	0.000116004	7.53533e-05	4.39675e-05	7.29203e-05		1.39967	**	0.729885
CD33050	Q180F0_PEPD6	ATP-dependent Clp protease proteolytic subunit OS=Peptoclostridium difficile (strain 630) GN=clpP PE=3 SV=1	-	0.00149174	0.00169989	0.000913857	0.00151495		0.706959		0.729235
CD07340	Q189T0_PEPD6	Uncharacterized protein OS=Peptoclostridium difficile (strain 630) GN=CD07340 PE=4 SV=1	-	2.32084e-06	3.71595e-05	1.45534e-05	2.40708e-05		-2.64863	**	0.725931	**
CD13140	TRUB_PEPD6	tRNA pseudouridine synthase B OS=Peptoclostridium difficile (strain 630) GN=truB PE=3 SV=1	-	2.64839e-05	2.39631e-05	1.15045e-05	1.90186e-05		1.20292	**	0.725215
CD30710	Q184Q9_PEPD6	Glycosyl hydrolase OS=Peptoclostridium difficile (strain 630) GN=CD30710 PE=3 SV=1	-	1.79632e-05	2.53819e-05	1.35058e-05	2.22347e-05		0.411465		0.719229
CD28670	Q183V5_PEPD6	Putative regulatory protease, U62 family OS=Peptoclostridium difficile (strain 630) GN=CD28670 PE=4 SV=1	-	0.000107868	8.98592e-05	6.97588e-05	0.000114805		0.628825		0.718733
CD13060	RIMP_PEPD6	Ribosome maturation factor RimP OS=Peptoclostridium difficile (strain 630) GN=rimP PE=3 SV=1	-	0.000187458	0.000115791	0.000106457	0.000175134		0.816298		0.718192
CD02680	Q18D05_PEPD6	Flagellar hook-basal body complex protein FlgG1 OS=Peptoclostridium difficile (strain 630) GN=flgG1 PE=4 SV=1	-	8.23621e-05	6.80655e-05	2.05881e-05	3.38138e-05		2.00017		0.715804
CD27290	Q183G5_PEPD6	Putative regulator of the sigma(E) factor OS=Peptoclostridium difficile (strain 630) GN=CD27290 PE=4 SV=1	-	7.06654e-05	0.000118102	3.95342e-05	6.492e-05		0.837902	**	0.715562	**
CD28550	Q183U0_PEPD6	Putative NAD(P)-binding oxidoreductase OS=Peptoclostridium difficile (strain 630) GN=CD28550 PE=4 SV=1	-	1.40977e-05	2.03107e-05	1.53534e-05	2.52015e-05		-0.123099		0.714951
CD13050	Q18BG8_PEPD6	DNA polymerase III PolC-type OS=Peptoclostridium difficile (strain 630) GN=polC PE=3 SV=1	-	1.157e-05	1.4708e-05	8.0219e-06	1.31564e-05		0.528375		0.713751
CD11570	Q18B19_PEPD6	Anaerobic nitric oxide reductase flavorubredoxin (FlRd) (FlavoRb) OS=Peptoclostridium difficile (strain 630) GN=norV PE=4 SV=1	-	0.00175885	0.00362322	0.00106183	0.00174054		0.728076	**	0.712979
CD10840	Q18AT8_PEPD6	ABC-type transport system, multidrug-family ATP-binding/permease protein OS=Peptoclostridium difficile (strain 630) GN=CD10840 PE=3 SV=1	-	9.68076e-05	0.000108326	4.29188e-05	7.02116e-05		1.17351	**	0.710098	**
CD10860	Q18AU1_PEPD6	Putative peptidase, M20D family OS=Peptoclostridium difficile (strain 630) GN=CD10860 PE=4 SV=2	-	0.00108695	0.00110107	0.000371549	0.000607476		1.54866	**	0.709276
CD07580	Q189V6_PEPD6	Pyruvate formate-lyase activating enzyme OS=Peptoclostridium difficile (strain 630) GN=pflA PE=4 SV=1	-	0.000122861	0.00016729	8.95618e-05	0.000146378		0.456074		0.708746	**
CD13310	Q18BJ6_PEPD6	Signal peptidase I, S26A family OS=Peptoclostridium difficile (strain 630) GN=sip3 PE=3 SV=1	-	0.000186503	4.96605e-05	5.41598e-05	8.84429e-05		1.7839	**	0.707523
CD09070	Q18A97_PEPD6	Transcriptional regulator, Phage-type OS=Peptoclostridium difficile (strain 630) GN=CD09070 PE=4 SV=1	-	5.4861e-06	2.91975e-05	1.05951e-05	1.72751e-05		-0.949543		0.705296
CD33110	Q180F4_PEPD6	Uncharacterized protein OS=Peptoclostridium difficile (strain 630) GN=CD33110 PE=4 SV=1	-	6.25816e-05	6.18323e-05	2.73896e-05	4.39062e-05		1.19211	**	0.680797
CD33070	Q180F1_PEPD6	Putative phosphoesterase OS=Peptoclostridium difficile (strain 630) GN=CD33070 PE=4 SV=1	-		7.59761e-06	9.54116e-06	1.52891e-05		OFF		0.680271	**
CD20520	Q188C2_PEPD6	Putative lipoprotein OS=Peptoclostridium difficile (strain 630) GN=CD20520 PE=4 SV=2	-	1.12886e-05	1.21402e-05	8.79347e-06	1.40542e-05		0.360368		0.6765	**
CD27480	Q183I2_PEPD6	Putative acyltransferase OS=Peptoclostridium difficile (strain 630) GN=CD27480 PE=1 SV=1	-	0.000116215	0.000136262	7.79953e-05	0.000124464		0.575339		0.674274	**
CD05140	Q188W0_PEPD6	Putative hemagglutinin/adhesin cwpV OS=Peptoclostridium difficile (strain 630) GN=cwpV PE=4 SV=1	-	0.000182593	0.000342181	0.00644488	0.0102744		-5.14145	**	0.672833
CD11480	Q18B08_PEPD6	Putative penicillin-binding protein with a N-terminal TonB-box OS=Peptoclostridium difficile (strain 630) GN=CD11480 PE=4 SV=1	-	0.00012451	9.50739e-05	0.000121718	0.000193792		0.0327205		0.67097
CD33480	Q180J3_PEPD6	Uncharacterized protein OS=Peptoclostridium difficile (strain 630) GN=CD33480 PE=4 SV=1	-	2.76322e-05	3.19246e-05	1.89548e-05	3.01583e-05		0.543789		0.669993	**
CD00650	Q18CF0_PEPD6	Putative NADP-dependent deshydrogenase OS=Peptoclostridium difficile (strain 630) GN=CD00650 PE=4 SV=1	-	0.00172783	0.00350291	0.0020507	0.00325745		-0.247156		0.667623	**
CD05380	Q188Y1_PEPD6	Putative methyl-accepting chemotaxis receptor,MCP family OS=Peptoclostridium difficile (strain 630) GN=CD05380 PE=4 SV=1	-	2.12481e-05	3.61784e-05	2.82074e-05	4.46424e-05		-0.408734		0.662343
CD08120	Q18A09_PEPD6	Putative universal stress protein A (UspA) OS=Peptoclostridium difficile (strain 630) GN=CD08120 PE=4 SV=1	-	0.000798595	0.00121609	0.000660732	0.00104378		0.273399		0.659682	**
CD03310	Q18D70_PEPD6	Peptidyl-prolyl cis-trans isomerase B (PPIase B) (Rotamase B) OS=Peptoclostridium difficile (strain 630) GN=ppiB PE=3 SV=1	-	0.000457103	0.000488128	0.000415412	0.000654343		0.137975		0.655503	**
CD01990	Q18CT7_PEPD6	Putative membrane-associated nucleotidase OS=Peptoclostridium difficile (strain 630) GN=CD01990 PE=4 SV=1	-	0.000108044	0.000135916	9.86612e-05	0.000155346		0.13107		0.654933	**
CD15240	Q18C45_PEPD6	Putative rubrerythrin OS=Peptoclostridium difficile (strain 630) GN=CD15240 PE=4 SV=1	-	0.00452436	0.00441694	0.00308049	0.00484895		0.554552	**	0.654513	**
CD02670	Q18D06_PEPD6	Putative flagellar protein OS=Peptoclostridium difficile (strain 630) GN=CD02670 PE=4 SV=1	-	2.27088e-05	1.65672e-05	1.12356e-05	1.76381e-05		1.01517		0.650615
CD33010	LON_PEPD6	Lon protease OS=Peptoclostridium difficile (strain 630) GN=lon PE=3 SV=2	-	0.000513818	0.000414134	0.000389725	0.000611386		0.398801		0.649627	**
CD15130	PANB_PEPD6	3-methyl-2-oxobutanoate hydroxymethyltransferase OS=Peptoclostridium difficile (strain 630) GN=panB PE=3 SV=1	-	2.1675e-05	3.39743e-05	1.61263e-05	2.52718e-05		0.426616		0.648112
CD17810	Q186Z3_PEPD6	Putative lipoprotein OS=Peptoclostridium difficile (strain 630) GN=CD17810 PE=4 SV=1	-	0.000158519	7.9906e-05	7.94307e-05	0.000124406		0.996885		0.647284
CD14000	Q18BR7_PEPD6	Uncharacterized protein OS=Peptoclostridium difficile (strain 630) GN=CD14000 PE=4 SV=1	-	9.75888e-05	0.000112262	8.27744e-05	0.000129641		0.237531		0.647261	**
CD27960	Q183N2_PEPD6	Cell surface protein cwp10 OS=Peptoclostridium difficile (strain 630) GN=cwp10 PE=4 SV=2	-	0.000172687	0.000204524	8.66187e-05	0.000134631		0.995407	**	0.636262
CD27860	Q183M2_PEPD6	Putative cell surface protein cwp5 OS=Peptoclostridium difficile (strain 630) GN=cwp5 PE=4 SV=1	-	2.03951e-05	3.20372e-05	4.48574e-05	6.95641e-05		-1.13712	**	0.632998	**
CD26510	MURG_PEPD6	UDP-N-acetylglucosamine--N-acetylmuramyl-(pentapeptide) pyrophosphoryl-undecaprenol N-acetylglucosamine transferase OS=Peptoclostridium difficile (strain 630) GN=murG PE=3 SV=1	-	0.000162591	0.000124418	6.42176e-05	9.94622e-05		1.3402	**	0.63118
CD14460	Q18BW5_PEPD6	Para-aminobenzoate synthase component I OS=Peptoclostridium difficile (strain 630) GN=pabB PE=4 SV=1	-	5.30282e-05	6.66955e-05	4.14181e-05	6.38935e-05		0.3565		0.625409
CD08370	Q18A30_PEPD6	Putative nitroreductase OS=Peptoclostridium difficile (strain 630) GN=CD08370 PE=4 SV=1	-	4.94192e-05	4.31964e-05	2.36146e-05	3.64196e-05		1.06539	**	0.625035
CD22500	Q185C2_PEPD6	Putative membrane protein OS=Peptoclostridium difficile (strain 630) GN=CD22500 PE=4 SV=1	-	2.88496e-05	2.35454e-05	3.2789e-05	5.05152e-05		-0.184664		0.623503	**
CD25900	Q182T1_PEPD6	Diaminopimelate epimerase OS=Peptoclostridium difficile (strain 630) GN=dapF PE=3 SV=1	-	0.000145515	0.000156677	8.15598e-05	0.000125628		0.835242	**	0.623224	**
CD26610	Q182Z5_PEPD6	Putative peptidase, M16 family OS=Peptoclostridium difficile (strain 630) GN=CD26610 PE=3 SV=1	-	8.73004e-05	8.1853e-05	5.39483e-05	8.30851e-05		0.694411	**	0.623012
CD14100	Q18BS7_PEPD6	Putative hydrolase, HAD superfamily, subfamily IIB OS=Peptoclostridium difficile (strain 630) GN=CD14100 PE=4 SV=1	-	9.13565e-05	0.000118118	7.74304e-05	0.000119245		0.238608		0.622959	**
CD15350	Q18C56_PEPD6	3-mercaptopyruvate sulfurtransferase OS=Peptoclostridium difficile (strain 630) GN=sseA PE=4 SV=1	-	0.000212883	0.000439214	0.000232256	0.000357537		-0.125654		0.622377	**
CD13030	Q18BG4_PEPD6	NAD-dependent protein deacetylase OS=Peptoclostridium difficile (strain 630) GN=npdA PE=3 SV=1	-	0.000122253	0.000141448	6.71315e-05	0.000103238		0.864804	**	0.620907	**
CD18650	Q187H6_PEPD6	Putative DNA recombination protein Tn1549-like,CTn5-Orf24 OS=Peptoclostridium difficile (strain 630) GN=CD18650 PE=4 SV=1	-	4.76348e-05	4.88676e-05	3.8156e-05	5.86335e-05		0.320104		0.619814
CD25621	RL28_PEPD6	50S ribosomal protein L28 OS=Peptoclostridium difficile (strain 630) GN=rpmB PE=3 SV=1	-	0.000326977	0.000164901	0.000263194	0.000404437		0.313061		0.619788
CD33940	Q180P2_PEPD6	Pyruvate kinase OS=Peptoclostridium difficile (strain 630) GN=pyk PE=3 SV=1	-	0.0059053	0.00569439	0.00535823	0.00822541		0.140253		0.618329
CD34100	UVRC_PEPD6	UvrABC system protein C OS=Peptoclostridium difficile (strain 630) GN=uvrC PE=3 SV=1	-	3.3666e-05	3.26642e-05	2.59749e-05	3.97433e-05		0.374174		0.613594
CD17040	THIG_PEPD6	Thiazole synthase OS=Peptoclostridium difficile (strain 630) GN=thiG PE=3 SV=1	-	0.000602092	0.00240835	0.00167129	0.00255709		-1.47291	**	0.613541	**
CD26190	Q182V3_PEPD6	Putative cell-division initiation protein DivIVA OS=Peptoclostridium difficile (strain 630) GN=CD26190 PE=4 SV=1	-	0.000381668	0.000309213	0.000256096	0.000391564		0.57563	**	0.612561	**
CD07810	Q189X7_PEPD6	Putative penicillin-binding protein OS=Peptoclostridium difficile (strain 630) GN=CD07810 PE=4 SV=1	-	0.000521225	0.000420645	0.000422525	0.00064601		0.302871		0.61252
CD15770	Q186D0_PEPD6	Alpha-phosphoglucomutase OS=Peptoclostridium difficile (strain 630) GN=pgm PE=3 SV=1	-	4.76505e-05	0.000100926	6.46501e-05	9.86776e-05		-0.44016		0.610072	**
CD35880	Q181J0_PEPD6	Carbamoyl-phosphate synthase large chain 1 OS=Peptoclostridium difficile (strain 630) GN=carB1 PE=3 SV=1	-	0.00212665	0.00238849	0.00168514	0.00256858		0.335717		0.608103
CD34700	ATPA_PEPD6	ATP synthase subunit alpha OS=Peptoclostridium difficile (strain 630) GN=atpA PE=3 SV=1	-	0.00172112	0.00154788	0.000858295	0.00130707		1.0038	**	0.606789	**
CD18950	Q187K4_PEPD6	Putative membrane protein OS=Peptoclostridium difficile (strain 630) GN=CD18950 PE=4 SV=1	-	0.000336017	0.000370989	0.000372916	0.000567316		-0.150317		0.6053
CD35900	Q181J2_PEPD6	Carbamoyl-phosphate synthase large chain 2 OS=Peptoclostridium difficile (strain 630) GN=carB2 PE=3 SV=1	-	0.00211402	0.00240733	0.00168514	0.00256064		0.327121		0.603635
CD35660	ISPE_PEPD6	4-diphosphocytidyl-2-C-methyl-D-erythritol kinase OS=Peptoclostridium difficile (strain 630) GN=ispE PE=3 SV=1	-	6.36222e-05	7.531e-05	5.15299e-05	7.79351e-05		0.30412		0.596862
CD34680	ATPB_PEPD6	ATP synthase subunit beta OS=Peptoclostridium difficile (strain 630) GN=atpD PE=3 SV=1	-	0.00239742	0.0022562	0.00124565	0.00188353		0.944582	**	0.596537	**
CD36670	Q181S1_PEPD6	Selenium metabolism protein yedf OS=Peptoclostridium difficile (strain 630) GN=CD36670 PE=4 SV=1	-	4.49258e-05	3.66224e-05	3.38147e-05	5.10257e-05		0.409893		0.593573	**
CD09580	Q183Z2_PEPD6	Putative phage protein OS=Peptoclostridium difficile (strain 630) GN=CD09580 PE=4 SV=1	-	2.76026e-05	4.36315e-05	3.94332e-05	5.94576e-05		-0.514606		0.592452
CD36611	RS18_PEPD6	30S ribosomal protein S18 OS=Peptoclostridium difficile (strain 630) GN=rpsR PE=3 SV=1	-	0.000650356	0.000640105	0.000368216	0.000554355		0.820679	**	0.590258
CD26830	Q183B8_PEPD6	Phosphate propanoyltransferase OS=Peptoclostridium difficile (strain 630) GN=CD26830 PE=3 SV=1	-	0.00145162	0.00162216	0.00107434	0.00161366		0.434219		0.586891
CD31030	Q184U0_PEPD6	PTS system, glucose-like IIA component OS=Peptoclostridium difficile (strain 630) GN=CD31030 PE=4 SV=1	-	0.000117318	8.68628e-05	8.63803e-05	0.000129523		0.441645	**	0.584433	**
CD23180	Q185J2_PEPD6	Putative phosphohexomutase OS=Peptoclostridium difficile (strain 630) GN=CD23180 PE=4 SV=1	-	0.000576481	0.000695662	0.000499397	0.000748297		0.207088		0.583425	**
CD26380	Q182X2_PEPD6	Two-component response regulator OS=Peptoclostridium difficile (strain 630) GN=CD26380 PE=4 SV=1	-	1.40428e-05	9.89695e-06	1.50144e-05	2.24686e-05		-0.0965127		0.581564	**
CD35590	Q181G0_PEPD6	ATP-dependent zinc metalloprotease FtsH OS=Peptoclostridium difficile (strain 630) GN=ftsH2 PE=3 SV=1	-	0.000942108	0.000875353	0.000813274	0.00121698		0.212153		0.581488	**
CD19730	Q187T3_PEPD6	Aluminum resistance protein OS=Peptoclostridium difficile (strain 630) GN=CD19730 PE=4 SV=1	-	0.000185287	0.000157035	0.000111938	0.00016748		0.727056	**	0.581285	**
CD35240	Q181C4_PEPD6	Ribonuclease M5 OS=Peptoclostridium difficile (strain 630) GN=rnmV PE=3 SV=1	-	3.13084e-05		2.55281e-05	3.79801e-05		0.294459		0.573155
CD01020	Q18CJ3_PEPD6	Energy-coupling factor transporter transmembrane protein EcfT OS=Peptoclostridium difficile (strain 630) GN=cbiQ PE=3 SV=1	-	3.51527e-05	5.69066e-05	1.62549e-05	2.41802e-05		1.11276		0.572951
CD27670	Q183K2_PEPD6	Cell surface protein cwp19 OS=Peptoclostridium difficile (strain 630) GN=cwp19 PE=4 SV=1	-	0.0011472	0.00227527	0.00156786	0.00233094		-0.45067	**	0.57212	**
CD17990	Q187B0_PEPD6	Tellurium resistance protein terD3 OS=Peptoclostridium difficile (strain 630) GN=terD3 PE=4 SV=1	-	0.000320181	0.000433116	0.000382208	0.0005681		-0.255473		0.571786	**
CD01830	Q18CS3_PEPD6	Putative cell wall hydrolase OS=Peptoclostridium difficile (strain 630) GN=CD01830 PE=4 SV=1	-	2.46824e-05	2.45225e-05	1.76412e-05	2.61874e-05		0.484532		0.56992
CD27980	Q183N5_PEPD6	Cell wall binding protein cwp9 OS=Peptoclostridium difficile (strain 630) GN=cwp9 PE=4 SV=2	-	9.55047e-05	4.41477e-05	2.11689e-05	3.13827e-05		2.17363	**	0.568024
CD35440	Q181E4_PEPD6	Transcriptional regulator, AsnC/Lrp family OS=Peptoclostridium difficile (strain 630) GN=CD35440 PE=4 SV=1	-	0.0003376	0.000398362	0.000367477	0.000544358		-0.122339		0.566903	**
CD25610	Q182P9_PEPD6	Putative phosphatase OS=Peptoclostridium difficile (strain 630) GN=CD25610 PE=4 SV=1	-	0.000574776	0.000577457	0.000490537	0.000725888		0.228637		0.565384
CD23350	Q185K9_PEPD6	Inositol-5'-monophosphate dehydrogenase (IMP dehydrogenase) (IMPDH) (IMPD) OS=Peptoclostridium difficile (strain 630) GN=guaB PE=3 SV=1	-	0.00180485	0.00261577	0.00142548	0.0021088		0.340436		0.56498	**
CD27990	Q183N4_PEPD6	Cell wall binding protein cwp8 OS=Peptoclostridium difficile (strain 630) GN=cwp8 PE=4 SV=1	-	4.61767e-05	4.06571e-05	3.73213e-05	5.52111e-05		0.307166		0.564961	**
CD27560	Q183J2_PEPD6	PTS system, HPr protein OS=Peptoclostridium difficile (strain 630) GN=ptsH PE=4 SV=1	-	0.00105573	0.000889004	0.000954413	0.00140877		0.145557		0.56175
CD01930	CH10_PEPD6	10 kDa chaperonin OS=Peptoclostridium difficile (strain 630) GN=groS PE=3 SV=1	-	0.00668793	0.00316618	0.00226627	0.00334417		1.56124	**	0.561325	**
CD27830	Q183M0_PEPD6	Putative glycosyl transferase OS=Peptoclostridium difficile (strain 630) GN=CD27830 PE=4 SV=1	-	5.9651e-05	5.65434e-05	5.04318e-05	7.42931e-05		0.242213		0.558895
CD34670	Q180W6_PEPD6	ATP hydrolase epsilon chain OS=Peptoclostridium difficile (strain 630) GN=atpC1 PE=3 SV=1	-	0.000149401	0.000126305	7.24088e-05	0.000106507		1.04496	**	0.556706	**
CD18140	Q187C3_PEPD6	Putative phosphoglycerate mutase OS=Peptoclostridium difficile (strain 630) GN=CD18140 PE=4 SV=1	-	0.000320623	0.000217308	0.000188319	0.000276618		0.767702	**	0.554722
CD07880	Q189Y8_PEPD6	GTPase HflX OS=Peptoclostridium difficile (strain 630) GN=hflX PE=3 SV=1	-	0.000142371	0.000149155	0.000100699	0.000147822		0.499611	**	0.553819	**
CD07080	Q189Q4_PEPD6	Peptidase D, aminoacyl-histidine dipeptidase OS=Peptoclostridium difficile (strain 630) GN=pepD PE=4 SV=1	-	0.00261245	0.00434769	0.0024477	0.00358805		0.0939767		0.551771	**
CD18130	Q187B9_PEPD6	Uncharacterized protein OS=Peptoclostridium difficile (strain 630) GN=CD18130 PE=4 SV=1	-	2.62191e-05	4.92761e-05	2.55428e-05	3.74112e-05		0.037702		0.550551
CD13040	Q5S4P9_PEPD6	Acd OS=Peptoclostridium difficile (strain 630) GN=acd PE=4 SV=1	-	0.000159767	7.72528e-05	7.41291e-05	0.000108465		1.10786	**	0.549117
CD26150	Q182V0_PEPD6	Transcriptional regulator, TetR family OS=Peptoclostridium difficile (strain 630) GN=CD26150 PE=4 SV=1	-	1.50017e-05	2.10984e-05	1.66281e-05	2.42672e-05		-0.148497		0.54539	**
CD00100	Q18C93_PEPD6	Serine-protein kinase RsbW OS=Peptoclostridium difficile (strain 630) GN=rsbW PE=4 SV=1	-	0.000164888	0.000166288	7.41494e-05	0.000108132		1.15298	**	0.544285
CD07590	Q189V5_PEPD6	Formate acetyltransferase (Pyruvate formate-lyase) OS=Peptoclostridium difficile (strain 630) GN=plfB PE=4 SV=1	-	0.00774599	0.0108401	0.00615773	0.0089725		0.331052		0.543113	**
CD32280	Q17ZX3_PEPD6	Putative membrane protein OS=Peptoclostridium difficile (strain 630) GN=CD32280 PE=4 SV=1	-	3.54997e-06	1.6204e-05	1.05633e-05	1.53587e-05		-1.57318		0.540005
CD05530	Q189A0_PEPD6	Putative RNA methyltransferase OS=Peptoclostridium difficile (strain 630) GN=CD05530 PE=4 SV=1	-	2.19782e-05	1.71352e-05	2.03291e-05	2.95361e-05		0.112525		0.538931	**
CD19300	Q187P0_PEPD6	Putative exported protein OS=Peptoclostridium difficile (strain 630) GN=CD19300 PE=4 SV=1	-	2.91093e-05	4.01947e-05	1.89246e-05	2.749e-05		0.621219		0.538646
CD20290	Q187Z8_PEPD6	Putative lipoprotein OS=Peptoclostridium difficile (strain 630) GN=CD20290 PE=4 SV=1	-	8.92522e-05	9.90261e-05	5.58926e-05	8.08803e-05		0.67523		0.533131
CD14530	Q18BX3_PEPD6	Phospho-2-dehydro-3-deoxyheptonate aldolase OS=Peptoclostridium difficile (strain 630) GN=aroF PE=4 SV=1	-	4.45628e-05	3.29612e-05	2.34419e-05	3.39035e-05		0.926753	**	0.532346
CD02580	Q18D03_PEPD6	Flagellar basal body-associated protein FliL OS=Peptoclostridium difficile (strain 630) GN=fliL PE=4 SV=1	-	0.000143194	0.000125379	0.000121473	0.000175601		0.237335		0.531661
CD24510	Q182D7_PEPD6	Putative CRISPR-associated ATP-dependent helicase OS=Peptoclostridium difficile (strain 630) GN=CD24510 PE=4 SV=2	-	2.17475e-05	2.23694e-05	2.99203e-05	4.31912e-05		-0.460272		0.529612
CD28660	Q183U8_PEPD6	Putative modulator of DNA gyrase, peptidase U62 OS=Peptoclostridium difficile (strain 630) GN=CD28660 PE=4 SV=1	-	3.95501e-05	6.42405e-05	6.37735e-05	9.20329e-05		-0.689276	**	0.529193	**
CD01430	SECA1_PEPD6	Protein translocase subunit SecA 1 OS=Peptoclostridium difficile (strain 630) GN=secA1 PE=3 SV=1	-	0.0010283	0.000820952	0.000690695	0.00099372		0.574141		0.52479
CD27940	Q183N1_PEPD6	Cell wall binding protein cwp12 OS=Peptoclostridium difficile (strain 630) GN=cwp12 PE=4 SV=1	-	0.000490038	0.000420291	0.000374775	0.000539037		0.38687	**	0.524363	**
CD01440	Q18CN5_PEPD6	Peptide chain release factor 2 (RF-2) OS=Peptoclostridium difficile (strain 630) GN=prfB PE=4 SV=1	-	1.92705e-05		1.27698e-05	1.83552e-05		0.593659		0.523452	**
CD34870	Q180Y6_PEPD6	Transcription termination factor Rho OS=Peptoclostridium difficile (strain 630) GN=rho PE=3 SV=2	-	0.000176036	0.000236265	0.000163351	0.000234566		0.107898		0.522021	**
CD13770	Q18BP9_PEPD6	Putative membrane protein OS=Peptoclostridium difficile (strain 630) GN=CD13770 PE=4 SV=1	-	0.000413036	0.000333863	0.0002034	0.00029191		1.02195	**	0.521209	**
CD17510	Q186V9_PEPD6	Putative cell wall binding protein cwp13 OS=Peptoclostridium difficile (strain 630) GN=cwp13 PE=4 SV=1	-	0.00045654	0.000587785	0.000325695	0.000467378		0.487218		0.521068
CD31570	SSRP_PEPD6	SsrA-binding protein OS=Peptoclostridium difficile (strain 630) GN=smpB PE=3 SV=1	-	0.000232542	0.000202605	0.000105976	0.000151118		1.13376	**	0.511942
CD34850	Q180Y4_PEPD6	Release factor glutamine methyltransferase OS=Peptoclostridium difficile (strain 630) GN=hemK PE=3 SV=1	-	2.28036e-05	2.04087e-05	1.23776e-05	1.76385e-05		0.881534		0.510996
CD29630	Q184F4_PEPD6	Uncharacterized protein OS=Peptoclostridium difficile (strain 630) GN=CD29630 PE=4 SV=1	-	0.000262847	0.000239717	0.000229264	0.000326443		0.197211		0.50982	**
CD15530	HIS6_PEPD6	Imidazole glycerol phosphate synthase subunit HisF OS=Peptoclostridium difficile (strain 630) GN=hisF PE=3 SV=1	-	0.000118347	0.000122161	0.000128014	0.000182256		-0.113284		0.509657
CD34690	Q180W7_PEPD6	ATP synthase gamma chain OS=Peptoclostridium difficile (strain 630) GN=atpG PE=3 SV=1	-	0.000364486	0.000409559	0.000248181	0.000353329		0.554469	**	0.509618	**
CD00270	Q18CB3_PEPD6	DNA repair protein radA OS=Peptoclostridium difficile (strain 630) GN=radA PE=3 SV=1	-	8.12584e-05	2.13278e-05	1.57987e-05	2.24839e-05		2.36272	**	0.509091
CD25130	Q182K0_PEPD6	Putative translation inhibitor endoribonuclease OS=Peptoclostridium difficile (strain 630) GN=CD25130 PE=4 SV=1	-	0.00409032	0.00459767	0.00322004	0.00456915		0.345136		0.50485	**
CD27870	Q183M1_PEPD6	Cell surface protein cwp84 OS=Peptoclostridium difficile (strain 630) GN=cwp84 PE=4 SV=1	-	0.00161394	0.00207388	0.0014317	0.00203037		0.172859		0.50401	**
CD10370	Q18AN7_PEPD6	Uncharacterized protein OS=Peptoclostridium difficile (strain 630) GN=CD10370 PE=4 SV=1	-	2.28928e-05	2.75666e-05	2.78256e-05	3.93926e-05		-0.281519		0.501512	**
CD36220	Q181M1_PEPD6	Uncharacterized protein OS=Peptoclostridium difficile (strain 630) GN=CD36220 PE=4 SV=1	-	5.44791e-05	3.54709e-05	6.00578e-05	8.49285e-05		-0.14065		0.499897
CD25750	Q182R3_PEPD6	Ribulose-phosphate 3-epimerase OS=Peptoclostridium difficile (strain 630) GN=rpe1 PE=3 SV=1	-	0.000727049	0.00105789	0.000599744	0.000845966		0.277707	**	0.496254	**
CD07610	Q189V7_PEPD6	Putative ATP-dependent RNA helicase OS=Peptoclostridium difficile (strain 630) GN=CD07610 PE=3 SV=1	-	0.000303325	0.000244284	0.000256207	0.000361117		0.243552		0.495154
CD03440	Q18D83_PEPD6	Putative beta-lactamase-like protein OS=Peptoclostridium difficile (strain 630) GN=CD03440 PE=4 SV=1	-	3.58952e-05	1.64025e-05	2.30164e-05	3.24392e-05		0.641129		0.495075
CD02830	Q18D25_PEPD6	Transcription antiterminator, PTS operon regulator OS=Peptoclostridium difficile (strain 630) GN=CD02830 PE=4 SV=1	-	2.86877e-05	4.15321e-05	3.85958e-05	5.43863e-05		-0.428011		0.494798
CD24540	Q182E0_PEPD6	Uncharacterized protein OS=Peptoclostridium difficile (strain 630) GN=CD24540 PE=4 SV=1	-		1.81587e-05	1.21103e-05	1.70563e-05		OFF		0.494067	**
CD31490	Q184Y6_PEPD6	DNA helicase OS=Peptoclostridium difficile (strain 630) GN=CD31490 PE=4 SV=1	-	2.28785e-05	4.45318e-05	2.92453e-05	4.11892e-05		-0.354216		0.494061
CD27420	Q183H6_PEPD6	Putative hydrolase beta-lactamase-like OS=Peptoclostridium difficile (strain 630) GN=CD27420 PE=4 SV=1	-	0.000251099	0.000255242	0.000214733	0.000302413		0.22571		0.493975	**
CD08850	Q18A78_PEPD6	Alpha-1,4 glucan phosphorylase OS=Peptoclostridium difficile (strain 630) GN=glgP PE=3 SV=1	-	4.41851e-05	5.27479e-05	4.01171e-05	5.63743e-05		0.139342		0.490821
CD21950	Q185Y2_PEPD6	Ferritin OS=Peptoclostridium difficile (strain 630) GN=ftnA PE=3 SV=1	-	0.00216996	0.00265652	0.00165721	0.00232856		0.38891		0.490678
CD34710	ATPD_PEPD6	ATP synthase subunit delta OS=Peptoclostridium difficile (strain 630) GN=atpH PE=3 SV=1	-	0.000379225	0.000428595	0.000229665	0.000322345		0.723524	**	0.489075
CD13570	Q18BM5_PEPD6	Putative peptidyl-prolyl isomerase OS=Peptoclostridium difficile (strain 630) GN=CD13570 PE=4 SV=1	-	0.00179343	0.00186404	0.00198139	0.00278038		-0.143791		0.488767	**
CD33060	TIG_PEPD6	Trigger factor OS=Peptoclostridium difficile (strain 630) GN=tig PE=3 SV=1	-	0.00318311	0.00256119	0.00398627	0.00558469		-0.324605		0.486437
CD16120	Q186G7_PEPD6	Putative amidohydrolase OS=Peptoclostridium difficile (strain 630) GN=CD16120 PE=4 SV=1	-	4.02219e-05	3.62161e-05	2.35381e-05	3.2971e-05		0.772982		0.486201
CD00620	RL1_PEPD6	50S ribosomal protein L1 OS=Peptoclostridium difficile (strain 630) GN=rplA PE=3 SV=1	-	0.00542137	0.00513432	0.00403422	0.00564254		0.426366	**	0.484055	**
CD32050	Q17ZU8_PEPD6	Putative nitroreductase OS=Peptoclostridium difficile (strain 630) GN=CD32050 PE=1 SV=1	-	0.000178436	0.000222642	0.00013803	0.000192949		0.370421		0.483232	**
CD25280	Q182L4_PEPD6	Uncharacterized protein OS=Peptoclostridium difficile (strain 630) GN=CD25280 PE=4 SV=1	-	0.000115408	0.000101712	5.14092e-05	7.18157e-05		1.16665	**	0.482274	**
CD35950	Q181J7_PEPD6	Aminopeptidase OS=Peptoclostridium difficile (strain 630) GN=CD35950 PE=4 SV=1	-	0.000220211	0.000221531	0.000156134	0.000217687		0.496101		0.47947	**
CD04920	Q188T4_PEPD6	PTS system, mannose/fructose/sorbose IIB component OS=Peptoclostridium difficile (strain 630) GN=CD04920 PE=4 SV=1	-	4.9613e-05	2.7405e-05	2.37201e-05	3.29808e-05		1.06461		0.475516
CD27160	Q183F1_PEPD6	Uncharacterized protein OS=Peptoclostridium difficile (strain 630) GN=CD27160 PE=4 SV=1	-	0.000503043	0.000588308	0.00055487	0.000770287		-0.141468		0.473247	**
CD01840	PYRB_PEPD6	Aspartate carbamoyltransferase OS=Peptoclostridium difficile (strain 630) GN=pyrB PE=3 SV=1	-	0.000597126	0.00106284	0.00039311	0.000545497		0.603101		0.472635
CD27470	Q183I3_PEPD6	Putative ubiquinone biosynthesis protein OS=Peptoclostridium difficile (strain 630) GN=CD27470 PE=4 SV=1	-	3.42157e-05	1.69597e-05	1.53052e-05	2.12229e-05		1.16064	**	0.471601
CD27900	Q183M6_PEPD6	Putative LmbE-like deacetylase OS=Peptoclostridium difficile (strain 630) GN=CD27900 PE=4 SV=1	-	1.95917e-05		7.90306e-06	1.09567e-05		1.30976		0.47133
CD27890	Q183M7_PEPD6	Cell surface protein cwp66 OS=Peptoclostridium difficile (strain 630) GN=cwp66 PE=4 SV=1	-	0.00106809	0.00134648	0.00105968	0.00146764		0.0113934		0.469868	**
CD11390	Q18AZ9_PEPD6	Electron transport complex subunit G OS=Peptoclostridium difficile (strain 630) GN=rnfG PE=3 SV=1	-	0.000240604	0.000179594	0.000181206	0.000250462		0.409026		0.466962
CD25010	Q182I7_PEPD6	Putative hydrolase, HAD superfamily, IIB subfamily OS=Peptoclostridium difficile (strain 630) GN=CD25010 PE=4 SV=1	-	4.42215e-05	4.06691e-05	2.80105e-05	3.86931e-05		0.658781		0.46611
CD10820	Q18AT5_PEPD6	Molybdopterin-guanine dinucleotide biosynthesis protein B OS=Peptoclostridium difficile (strain 630) GN=mobB PE=4 SV=1	-	1.31392e-05		8.51067e-06	1.17562e-05		0.626536		0.466074
CD24070	Q181Y9_PEPD6	Putative multidrug efflux pump OS=Peptoclostridium difficile (strain 630) GN=CD24070 PE=4 SV=1	-	4.11201e-05	3.01411e-05	3.55489e-05	4.91009e-05		0.210041		0.465947
CD09010	Q18A95_PEPD6	ABC-type transport system, glycine betaine/carnitine/choline permease OS=Peptoclostridium difficile (strain 630) GN=opuCC PE=3 SV=1	-	0.000176502	0.000150247	8.47133e-05	0.00011646		1.05903	**	0.459167	**
CD12250	Q18B84_PEPD6	Pyrimidine-nucleoside phosphorylase OS=Peptoclostridium difficile (strain 630) GN=pdp PE=4 SV=1	-	2.60203e-05	1.89604e-05	2.5987e-05	3.57254e-05		0.0018457		0.45916
CD21250	Q185R3_PEPD6	Putative acetyltransferase OS=Peptoclostridium difficile (strain 630) GN=CD21250 PE=4 SV=2	-	2.70336e-05	2.58872e-05	1.75311e-05	2.40879e-05		0.624836	**	0.458391
CD22270	Q186B3_PEPD6	Putative radical SAM superfamily lipoprotein OS=Peptoclostridium difficile (strain 630) GN=CD22270 PE=4 SV=1	-	0.000161544	0.000187908	0.000187271	0.000257267		-0.213203		0.458138
CD01950	Q18CT4_PEPD6	Putative NCAIR-mutase (PurE)-related protein OS=Peptoclostridium difficile (strain 630) GN=CD01950 PE=4 SV=1	-	9.87503e-05	7.39118e-05	5.98663e-05	8.22164e-05		0.722042		0.457682
CD11560	Q18B20_PEPD6	Uncharacterized protein OS=Peptoclostridium difficile (strain 630) GN=CD11560 PE=4 SV=1	-	7.42159e-05	0.000112107	9.04273e-05	0.00012405		-0.285029		0.456095
CD31670	Q181V7_PEPD6	Putative phosphatidylethanolamine-binding regulatory protein OS=Peptoclostridium difficile (strain 630) GN=CD31670 PE=4 SV=1	-	9.89843e-05	0.000146547	8.89879e-05	0.000122011		0.15359		0.455327
CD24470	Q182D4_PEPD6	Putative histidine triad (HIT) protein OS=Peptoclostridium difficile (strain 630) GN=CD24470 PE=1 SV=1	-	0.000409638	0.000747558	0.000340678	0.000466574		0.265942		0.453697	**
CD00890	RL15_PEPD6	50S ribosomal protein L15 OS=Peptoclostridium difficile (strain 630) GN=rplO PE=3 SV=1	-	0.00618508	0.00521282	0.00403794	0.00552979		0.615172		0.453605
CD16960	Q186Q3_PEPD6	Sodium:alanine symporter OS=Peptoclostridium difficile (strain 630) GN=CD16960 PE=4 SV=1	-	0.000137457	0.000129581	0.000124184	0.000170019		0.146495		0.453215
CD25890	Q182S9_PEPD6	Uncharacterised protein OS=Peptoclostridium difficile (strain 630) GN=CD25890 PE=4 SV=1	-	0.000147336	0.000167462	0.000142883	0.000195375		0.0442806		0.451416	**
CD13290	RNY_PEPD6	Ribonuclease Y OS=Peptoclostridium difficile (strain 630) GN=rny PE=3 SV=2	-	0.000517507	0.000697894	0.000457712	0.000625721		0.177139		0.45108	**
CD32860	Q180D0_PEPD6	Putative sodium:phosphate symporter OS=Peptoclostridium difficile (strain 630) GN=CD32860 PE=4 SV=1	-	8.78368e-05	6.32486e-05	7.62592e-05	0.000104167		0.203914		0.449914
CD17910	Q187A3_PEPD6	Uncharacterized protein OS=Peptoclostridium difficile (strain 630) GN=CD17910 PE=4 SV=1	-	5.18827e-05	6.36491e-05	3.40975e-05	4.65145e-05		0.605586		0.448012
CD15480	HIS1_PEPD6	ATP phosphoribosyltransferase OS=Peptoclostridium difficile (strain 630) GN=hisG PE=3 SV=1	-	3.25903e-05	2.38709e-05	2.15866e-05	2.94454e-05		0.594307		0.447908
CD27650	Q183K0_PEPD6	Transcriptional regulator, LytR family OS=Peptoclostridium difficile (strain 630) GN=CD27650 PE=4 SV=1	-	6.0354e-05	1.23064e-05	1.24537e-05	1.69863e-05		2.27687	**	0.447799
CD00530	Q18CD4_PEPD6	Mini-ribonuclease 3 OS=Peptoclostridium difficile (strain 630) GN=mrnC PE=3 SV=1	-	3.66882e-05	4.44302e-05	2.97076e-05	4.05129e-05		0.304481		0.447548	**
CD23210	Q185J5_PEPD6	Transketolase, central and C-terminal (Sedoheptulose-7-phosphate:D-glyceraldehyde-3-phosphate glycolaldehydetransferase) OS=Peptoclostridium difficile (strain 630) GN=tkt' PE=4 SV=1	-	0.00288758	0.00290435	0.0024821	0.00337973		0.218302		0.445345	**
CD15520	HIS4_PEPD6	1-(5-phosphoribosyl)-5-[(5-phosphoribosylamino)methylideneamino] imidazole-4-carboxamide isomerase OS=Peptoclostridium difficile (strain 630) GN=hisA PE=3 SV=1	-	0.000192304	0.000191122	0.000177528	0.000241668		0.115341		0.444985	**
CD10410	ADDA_PEPD6	ATP-dependent helicase/nuclease subunit A OS=Peptoclostridium difficile (strain 630) GN=addA PE=3 SV=1	-	2.41954e-05	3.07306e-05	2.47926e-05	3.37126e-05		-0.0351751		0.44338
CD11590	Q18B17_PEPD6	Uncharacterized protein OS=Peptoclostridium difficile (strain 630) GN=CD11590 PE=4 SV=1	-	0.000107941	0.000191918	0.000146109	0.000198301		-0.436806		0.440644	**
CD15020	DEOC_PEPD6	Deoxyribose-phosphate aldolase OS=Peptoclostridium difficile (strain 630) GN=deoC PE=3 SV=1	-	0.000223784	0.000243332	0.000204506	0.000276599		0.129966		0.435654	**
CD20580	Q188C4_PEPD6	Uncharacterized protein OS=Peptoclostridium difficile (strain 630) GN=CD20580 PE=4 SV=1	-	0.000107447	0.000110681	9.89547e-05	0.000133643		0.118782		0.433539
CD24030	DUT_PEPD6	Deoxyuridine 5'-triphosphate nucleotidohydrolase OS=Peptoclostridium difficile (strain 630) GN=dut PE=3 SV=1	-	7.96124e-05	6.54681e-05	5.63941e-05	7.59955e-05		0.49745	**	0.430371	**
CD10470	Q18AP5_PEPD6	Putative cell wall-binding protein cwp18 OS=Peptoclostridium difficile (strain 630) GN=cwp18 PE=4 SV=1	-	0.0002238	0.000243064	0.000184325	0.000247944		0.279957		0.427764	**
CD02710	Q18D12_PEPD6	Flagellar motor switch phosphatase FliN1 OS=Peptoclostridium difficile (strain 630) GN=fliN1 PE=4 SV=1	-	9.38423e-05	0.000116006	9.13597e-05	0.00012274		0.0386798		0.425978	**
CD02550	Q18CZ4_PEPD6	Flagellar hook protein FlgE (Distal rod protein) OS=Peptoclostridium difficile (strain 630) GN=flgE PE=4 SV=1	-	0.000246822	0.000281482	0.000279183	0.000374984		-0.17774		0.425621	**
CD16370	Q186J2_PEPD6	Putative calcium-transporting ATPase OS=Peptoclostridium difficile (strain 630) GN=CD16370 PE=4 SV=1	-	0.00111812	0.000776593	0.00107781	0.00144616		0.0529663		0.424118
CD00250	Q18CB0_PEPD6	Protein-arginine kinase OS=Peptoclostridium difficile (strain 630) GN=mcsB PE=3 SV=1	-	0.000445835	0.00014105	8.39848e-05	0.000112148		2.40831	**	0.417198
CD03290	Q18D72_PEPD6	M18 family aminopeptidase OS=Peptoclostridium difficile (strain 630) GN=CD03290 PE=3 SV=1	-	0.000157972	0.000160256	0.000119711	0.000159754		0.400114	**	0.416293	**
CD21190	Q185Q8_PEPD6	Homoserine kinase OS=Peptoclostridium difficile (strain 630) GN=thrB PE=3 SV=2	-	0.000201934	0.000230507	0.000183237	0.000244062		0.140173		0.413535
CD24610	DNAK_PEPD6	Chaperone protein DnaK OS=Peptoclostridium difficile (strain 630) GN=dnaK PE=3 SV=1	-	0.00968055	0.00497572	0.00487496	0.00649086		0.989699	**	0.413019
CD32810	Q180C5_PEPD6	Pyrroline-5-carboxylate reductase OS=Peptoclostridium difficile (strain 630) GN=proC1 PE=4 SV=1	-	0.000368573	0.000516132	0.000364729	0.000484931		0.0151278		0.410956
CD03300	Q18D71_PEPD6	Phospholipase, patatin family OS=Peptoclostridium difficile (strain 630) GN=CD03300 PE=4 SV=1	-	9.41452e-05	9.78092e-05	7.81324e-05	0.000103871		0.268967		0.410799	**
CD25930	Q182T3_PEPD6	ABC-type transport system,pristinamycin/multidrug-family ATP-binding protein OS=Peptoclostridium difficile (strain 630) GN=CD25930 PE=3 SV=1	-	2.90671e-05	6.56892e-06	9.98024e-06	1.32672e-05		1.54224	**	0.410719
CD10380	Q18AN6_PEPD6	Putative helicase, superfamily 1, UvrD-family OS=Peptoclostridium difficile (strain 630) GN=CD10380 PE=4 SV=1	-	0.00091354	0.000718859	0.000316638	0.000420597		1.52863	**	0.409603
CD12740	Q18BD6_PEPD6	DNA topoisomerase 1 OS=Peptoclostridium difficile (strain 630) GN=topA PE=3 SV=1	-	0.000122056	6.46018e-05	8.08495e-05	0.000107385		0.594232		0.409483
CD25871	RPOZ_PEPD6	DNA-directed RNA polymerase subunit omega OS=Peptoclostridium difficile (strain 630) GN=rpoZ PE=3 SV=1	-	0.000210051	0.000181746	0.000151161	0.000200477		0.474652		0.407355
CD09760	Q183Y1_PEPD6	Putative phage protein OS=Peptoclostridium difficile (strain 630) GN=CD09760 PE=4 SV=1	-	0.000728236	0.000911062	0.000662864	0.000877063		0.135693		0.403968	**
CD19840	Q187U3_PEPD6	Putative hydrolase, NUDIX family OS=Peptoclostridium difficile (strain 630) GN=CD19840 PE=3 SV=1	-	2.9519e-05	3.58722e-05	2.06245e-05	2.72404e-05		0.517282		0.40139
CD01920	Q18CT1_PEPD6	Cardiolipin synthetase 1 OS=Peptoclostridium difficile (strain 630) GN=cls PE=3 SV=1	-	1.53092e-05	1.21231e-05	1.12999e-05	1.49229e-05		0.438091		0.401221
CD25880	KGUA_PEPD6	Guanylate kinase OS=Peptoclostridium difficile (strain 630) GN=gmk PE=3 SV=1	-	0.000177967	0.000156212	0.00013661	0.000180204		0.38155		0.399572
CD16980	Q186Q4_PEPD6	Riboflavin biosynthesis protein RibBA OS=Peptoclostridium difficile (strain 630) GN=ribBA PE=3 SV=1	-	0.00104842	0.000548704	0.00052803	0.00069652		0.989528	**	0.399547	**
CD06850	Q189N1_PEPD6	Translation initiation factor IF-3 OS=Peptoclostridium difficile (strain 630) GN=infC PE=3 SV=1	-	0.00113676	0.00166183	0.00107883	0.00142196		0.0754693		0.398421
CD35120	Q181B0_PEPD6	Putative type IV pilus transporter system,ATP-binding OS=Peptoclostridium difficile (strain 630) GN=CD35120 PE=4 SV=2	-	7.75687e-06	1.42829e-05	1.19256e-05	1.57166e-05		-0.620518		0.398226
CD33760	Q180M5_PEPD6	Putative transcriptional regulator Tn916-like,CTn7-Orf11 OS=Peptoclostridium difficile (strain 630) GN=CD33760 PE=4 SV=2	-	0.000100321	8.83864e-05	6.55701e-05	8.6322e-05		0.613519	**	0.396689
CD12610	Q18BC3_PEPD6	Putative ribonucleotide-diphosphate reductase OS=Peptoclostridium difficile (strain 630) GN=CD12610 PE=4 SV=1	-	0.00018184	0.000210641	0.000155959	0.000205304		0.221504		0.396591	**
CD21180	Q185Q9_PEPD6	Threonine synthase OS=Peptoclostridium difficile (strain 630) GN=thrC PE=4 SV=1	-	0.000354068	0.000345356	0.000264878	0.000348303		0.418695		0.395013
CD13200	Q18BI7_PEPD6	Putative peptidase, M16 family OS=Peptoclostridium difficile (strain 630) GN=CD13200 PE=3 SV=1	-	0.000196666	0.000122823	0.000126405	0.000166059		0.637695		0.393644
CD15290	Q18C49_PEPD6	ABC-type transport system, permease OS=Peptoclostridium difficile (strain 630) GN=CD15290 PE=4 SV=1	-	0.000668377	0.000587652	0.00039466	0.0005182		0.760053	**	0.392901	**
CD24411	Q182C7_PEPD6	PhoH-like protein OS=Peptoclostridium difficile (strain 630) GN=CD24411 PE=4 SV=1	-	0.000195579	0.000315689	0.000129692	0.000169889		0.592655		0.3895
CD26580	RSMH_PEPD6	Ribosomal RNA small subunit methyltransferase H OS=Peptoclostridium difficile (strain 630) GN=rsmH PE=3 SV=1	-	7.17809e-05	0.000143182	3.01313e-05	3.94573e-05		1.25234		0.389029
CD26600	Q182Z3_PEPD6	Putative peptidase, M16 family OS=Peptoclostridium difficile (strain 630) GN=CD26600 PE=3 SV=2	-	5.3453e-05	7.75991e-05	5.24133e-05	6.86098e-05		0.0283387		0.388483
CD19700	Q187T1_PEPD6	Putative enzyme, cyclase family OS=Peptoclostridium difficile (strain 630) GN=CD19700 PE=4 SV=1	-	0.000335776	0.000355487	0.000268155	0.000350991		0.324433	**	0.388367	**
CD26490	Q182Y3_PEPD6	Uncharacterized protein OS=Peptoclostridium difficile (strain 630) GN=CD26490 PE=4 SV=1	-	2.98691e-05	2.13826e-05	2.04095e-05	2.66516e-05		0.549414		0.384984
CD36610	Q181R3_PEPD6	Uncharacterised protein OS=Peptoclostridium difficile (strain 630) GN=CD36610 PE=4 SV=1	-	2.61286e-05	2.12467e-05	1.15404e-05	1.50452e-05		1.17894	**	0.382611
CD17060	Q186R4_PEPD6	Thiamine-phosphate pyrophosphorylase ThiE2 OS=Peptoclostridium difficile (strain 630) GN=thiE2 PE=4 SV=1	-		1.77079e-05	2.05582e-05	2.67968e-05		OFF		0.382346
CD21870	Q185X5_PEPD6	Putative phage-related cell wall hydrolase OS=Peptoclostridium difficile (strain 630) GN=CD21870 PE=4 SV=1	-	2.69196e-05	1.79508e-05	1.86286e-05	2.42706e-05		0.531142		0.381696
CD08900	SPEE_PEPD6	Polyamine aminopropyl transferase OS=Peptoclostridium difficile (strain 630) GN=speE PE=3 SV=1	-	0.00269386	0.00222427	0.00179302	0.0023357		0.587283	**	0.381464	**
CD25380	Q182M5_PEPD6	Putative lipoprotein OS=Peptoclostridium difficile (strain 630) GN=CD25380 PE=4 SV=1	-	2.75286e-05	3.97897e-05	3.12485e-05	4.06319e-05		-0.182856		0.378826
CD31640	Q185A2_PEPD6	Ribonuclease R OS=Peptoclostridium difficile (strain 630) GN=rnr PE=3 SV=1	-	0.00020923	0.000180079	0.000182648	0.000237472		0.196023		0.378691	**
CD15540	Q18C73_PEPD6	Histidine biosynthesis bifunctional protein HisIE OS=Peptoclostridium difficile (strain 630) GN=hisI PE=3 SV=1	-	0.000203906	0.000187713	0.00021082	0.000273981		-0.0481084		0.378064
CD16430	Q186K0_PEPD6	Uncharacterized protein OS=Peptoclostridium difficile (strain 630) GN=CD16430 PE=4 SV=1	-	3.44677e-05		2.95351e-05	3.83442e-05		0.222814		0.376579
CD26230	Q182V8_PEPD6	Putative pyridoxal 5'-phosphate-dependent enzyme OS=Peptoclostridium difficile (strain 630) GN=CD26230 PE=3 SV=1	-	0.000653764	0.000510911	0.000502516	0.000651963		0.379599		0.37562	**
CD04970	Q188T7_PEPD6	Putative conjugative transposon protein DUF961 family Tn5397, CTn3-Orf22 OS=Peptoclostridium difficile (strain 630) GN=CD04970 PE=4 SV=1	-		1.00171e-05	3.05251e-05	3.9573e-05		OFF		0.374522	**
CD25870	Q182S7_PEPD6	Coenzyme A biosynthesis bifunctional protein CoaBC phosphopantothenoylcysteine synthetase/decarboxylase OS=Peptoclostridium difficile (strain 630) GN=coaBC PE=4 SV=1	-	0.000138322	0.000215168	0.000131787	0.000170793		0.0698267		0.374037
CD21630	Q185V2_PEPD6	Putative alanyl-tRNA synthetase OS=Peptoclostridium difficile (strain 630) GN=CD21630 PE=4 SV=1	-	7.77956e-05	6.15681e-05	5.06724e-05	6.56688e-05		0.61849	**	0.37401
CD17050	Q186R5_PEPD6	Thiamine biosynthesis protein ThiH OS=Peptoclostridium difficile (strain 630) GN=thiH PE=4 SV=1	-	0.000212566	0.000868538	0.000595791	0.000770647		-1.4869	**	0.371265
CD27910	Q183M5_PEPD6	Cell wall binding protein cwp2 OS=Peptoclostridium difficile (strain 630) GN=cwp2 PE=4 SV=1	-	0.00521499	0.00548663	0.00495965	0.00641145		0.0724269		0.370413	**
CD14380	Q18BV6_PEPD6	Putative TPR repeat-containing protein OS=Peptoclostridium difficile (strain 630) GN=CD14380 PE=4 SV=1	-	0.000144729	0.000125294	9.87801e-05	0.000127618		0.55106		0.369536
CD30360	Q184M3_PEPD6	Transporter, Major Facilitator Superfamily (MFS) OS=Peptoclostridium difficile (strain 630) GN=CD30360 PE=4 SV=1	-	4.4451e-05	2.9153e-05	2.20721e-05	2.84198e-05		1.00999	**	0.364672
CD01940	CH60_PEPD6	60 kDa chaperonin OS=Peptoclostridium difficile (strain 630) GN=groL PE=3 SV=1	-	0.0113815	0.00651253	0.00464457	0.00597413		1.29307	**	0.363182
CD18170	Q187C7_PEPD6	Putative acyltransferase OS=Peptoclostridium difficile (strain 630) GN=CD18170 PE=4 SV=1	-	4.72467e-05	4.12272e-05	3.61945e-05	4.64945e-05		0.384444		0.36129
CD19340	Q187P5_PEPD6	Uncharacterized protein OS=Peptoclostridium difficile (strain 630) GN=CD19340 PE=4 SV=1	-	0.000204718	0.000229972	9.47995e-05	0.000121693		1.11069	**	0.360294
CD15960	Q186F1_PEPD6	Methionine aminopeptidase OS=Peptoclostridium difficile (strain 630) GN=map2 PE=3 SV=1	-	1.83263e-05	1.09918e-05	7.43639e-06	9.53498e-06		1.30124	**	0.358627
CD17451	Q186V3_PEPD6	Ferrous iron transport protein OS=Peptoclostridium difficile (strain 630) GN=feoA3 PE=4 SV=1	-	5.645e-05	5.50087e-05	2.86901e-05	3.67554e-05		0.97642	**	0.357402
CD13560	Q18BL8_PEPD6	Putative CBS domain-containing protein OS=Peptoclostridium difficile (strain 630) GN=CD13560 PE=4 SV=2	-	0.000248296	0.000242525	0.000183652	0.000235163		0.435086		0.35669
CD13820	Q18BQ0_PEPD6	Glycerol kinase OS=Peptoclostridium difficile (strain 630) GN=glpK2 PE=3 SV=1	-	2.55653e-05	5.2745e-05	3.4265e-05	4.38705e-05		-0.422549		0.356515
CD30410	PIP_PEPD6	Proline iminopeptidase OS=Peptoclostridium difficile (strain 630) GN=pip PE=3 SV=1	-	0.000708625	0.000900501	0.000750787	0.000960869		-0.0833817		0.355936	**
CD05080	Q188V1_PEPD6	Tetracycline resistance protein Tn5397 OS=Peptoclostridium difficile (strain 630) GN=tetM PE=4 SV=1	-	0.00114327	0.00104091	0.000910157	0.00116395		0.328985		0.354846	**
CD28050	RUVB_PEPD6	Holliday junction ATP-dependent DNA helicase RuvB OS=Peptoclostridium difficile (strain 630) GN=ruvB PE=3 SV=1	-	1.53005e-05	1.59572e-05	1.30963e-05	1.67477e-05		0.224424		0.354803
CD35710	Q181H5_PEPD6	Uncharacterized protein OS=Peptoclostridium difficile (strain 630) GN=CD35710 PE=4 SV=1	-	0.00112083	0.000839277	0.000725809	0.000927894		0.626908	**	0.354371
CD13960	Q18BR2_PEPD6	Putative amino acid amidase OS=Peptoclostridium difficile (strain 630) GN=CD13960 PE=4 SV=1	-	4.08501e-05	5.07416e-05	3.83807e-05	4.89959e-05		0.0899581		0.352279
CD12460	EFP_PEPD6	Elongation factor P OS=Peptoclostridium difficile (strain 630) GN=efp PE=3 SV=1	-	0.000916945	0.000862729	0.00102598	0.0013089		-0.162089		0.351358
CD21880	Q185X8_PEPD6	Maltose phosphorylase/glycosyl hydrolase/vacuolar acid trehalase OS=Peptoclostridium difficile (strain 630) GN=mapA PE=4 SV=1	-		7.96646e-06	1.98968e-05	2.53559e-05		OFF		0.349788
CD34020	MURB_PEPD6	UDP-N-acetylenolpyruvoylglucosamine reductase OS=Peptoclostridium difficile (strain 630) GN=murB PE=3 SV=1	-	0.000189809	0.000185187	0.000188431	0.000239876		0.0105093		0.348252
CD13410	Q18BK4_PEPD6	Exodeoxyribonuclease OS=Peptoclostridium difficile (strain 630) GN=exoA PE=4 SV=1	-	2.71669e-05	3.93094e-05	2.98294e-05	3.79605e-05		-0.134888		0.347761
CD07940	Q189Z0_PEPD6	NH(3)-dependent NAD(+) synthetase OS=Peptoclostridium difficile (strain 630) GN=nadE PE=3 SV=1	-	0.000530761	0.000591304	0.000440842	0.000560881		0.2678		0.347432	**
CD13430	Q18BL0_PEPD6	Glutamine synthetase OS=Peptoclostridium difficile (strain 630) GN=glnA PE=3 SV=1	-	0.000905402	0.000913968	0.000694853	0.000883511		0.381851		0.346539	**
CD17000	Q186Q7_PEPD6	Riboflavin biosynthesis protein RibD OS=Peptoclostridium difficile (strain 630) GN=ribD PE=3 SV=1	-	0.000258029	0.000363362	0.000127264	0.000161794		1.01971	**	0.346338
CD12480	Q18BA7_PEPD6	Ribonuclease 3 OS=Peptoclostridium difficile (strain 630) GN=rnc PE=3 SV=1	-	3.438e-05	3.55858e-05	3.27379e-05	4.16118e-05		0.0706094		0.346032	**
CD08100	Q18A03_PEPD6	Putative flavodoxin/nitric oxide synthase OS=Peptoclostridium difficile (strain 630) GN=CD08100 PE=4 SV=1	-	0.000263016	0.000555081	0.000399671	0.00050714		-0.603665	**	0.343571
CD13240	Q18BI9_PEPD6	DNA FtsK/SpoIIIE translocase OS=Peptoclostridium difficile (strain 630) GN=ftsK PE=4 SV=1	-	0.000246658	0.000172434	0.000169915	0.000215565		0.537701		0.343312
CD32270	DAPH_PEPD6	2,3,4,5-tetrahydropyridine-2,6-dicarboxylate N-acetyltransferase OS=Peptoclostridium difficile (strain 630) GN=dapH PE=3 SV=1	-	0.0003449	0.000293791	0.000334193	0.000423832		0.0454991		0.342811
CD17020	THIC_PEPD6	Phosphomethylpyrimidine synthase OS=Peptoclostridium difficile (strain 630) GN=thiC PE=3 SV=1	-	0.00126584	0.00320493	0.00252728	0.00320439		-0.997491	**	0.342462
CD14950	Q18C14_PEPD6	Pyrroline-5-carboxylate reductase OS=Peptoclostridium difficile (strain 630) GN=proC PE=4 SV=1	-	0.00044063	0.000612147	0.000417157	0.000528316		0.0789755		0.340809
CD10080	Q18AK5_PEPD6	S1 rna binding domain protein OS=Peptoclostridium difficile (strain 630) GN=CD10080 PE=4 SV=1	-	6.93677e-05	5.9558e-05	5.14177e-05	6.51065e-05		0.431999	**	0.340534	**
CD22040	Q185Z5_PEPD6	Putative esterase OS=Peptoclostridium difficile (strain 630) GN=CD22040 PE=4 SV=1	-	2.62894e-05	2.14744e-05	1.88555e-05	2.3866e-05		0.479494		0.339974
CD36770	Q181S9_PEPD6	Putative SpoIIIJ-associated RNA/ssDNA-binding protein Jag OS=Peptoclostridium difficile (strain 630) GN=jag PE=4 SV=1	-	0.000257598	0.000245846	0.000226861	0.000286935		0.183313		0.338918	**
CD32560	Q180A1_PEPD6	Valine--tRNA ligase OS=Peptoclostridium difficile (strain 630) GN=valS PE=3 SV=1	-	0.00121226	0.000918626	0.00125153	0.00158285		-0.0459936		0.338835
CD13090	IF2_PEPD6	Translation initiation factor IF-2 OS=Peptoclostridium difficile (strain 630) GN=infB PE=3 SV=1	-	0.00252845	0.00225088	0.00177382	0.00224205		0.511397		0.337959	**
CD35180	MURC_PEPD6	UDP-N-acetylmuramate--L-alanine ligase OS=Peptoclostridium difficile (strain 630) GN=murC PE=3 SV=1	-	0.000408979	0.000316467	0.000250574	0.000316606		0.706786	**	0.337449	**
CD14490	GCH1_PEPD6	GTP cyclohydrolase 1 OS=Peptoclostridium difficile (strain 630) GN=folE PE=3 SV=1	-	5.32406e-05	5.52299e-05	9.91144e-05	0.000125208		-0.896567		0.337155
CD36710	Q181S3_PEPD6	Stage 0 sporulation protein J, site-specific DNA-binding protein OS=Peptoclostridium difficile (strain 630) GN=spo0J PE=4 SV=1	-	2.90735e-05	5.7774e-05	6.86806e-05	8.67399e-05		-1.2402		0.336794
CD07360	Q189S8_PEPD6	Uncharacterised protein OS=Peptoclostridium difficile (strain 630) GN=CD07360 PE=4 SV=1	-	3.76496e-05	6.38378e-05	5.12838e-05	6.47286e-05		-0.44587		0.335899	**
CD02720	Q18D11_PEPD6	Uncharacterized protein OS=Peptoclostridium difficile (strain 630) GN=CD02720 PE=4 SV=1	-	2.91251e-05	3.2329e-05	4.03209e-05	5.08691e-05		-0.469264		0.33526	**
CD10850	Q18AT7_PEPD6	Putative membrane protein OS=Peptoclostridium difficile (strain 630) GN=CD10850 PE=4 SV=1	-	0.000126869	0.000175645	6.49544e-05	8.17192e-05		0.965837	**	0.331248
CD01710	REX_PEPD6	Redox-sensing transcriptional repressor Rex OS=Peptoclostridium difficile (strain 630) GN=rex PE=3 SV=1	-	0.000790489	0.000825048	0.000581689	0.000731349		0.442498	**	0.330313
CD05450	Q188Y7_PEPD6	Putative lipoprotein OS=Peptoclostridium difficile (strain 630) GN=CD05450 PE=4 SV=1	-	0.000148853	0.000241336	0.000136198	0.000171046		0.128191		0.328686
CD35190	Q181B9_PEPD6	Uncharacterized protein OS=Peptoclostridium difficile (strain 630) GN=CD35190 PE=4 SV=1	-	1.08323e-05		6.85474e-06	8.59005e-06		0.660163		0.325564
CD27930	Q183M8_PEPD6	Precursor of the S-layer proteins OS=Peptoclostridium difficile (strain 630) GN=slpA PE=1 SV=1	-	0.0486988	0.0631679	0.0518045	0.0648771		-0.0891938		0.32463
CD16940	Q186Q1_PEPD6	Uncharacterized protein OS=Peptoclostridium difficile (strain 630) GN=CD16940 PE=4 SV=1	-	2.3207e-05	4.53432e-05	1.40788e-05	1.76235e-05		0.721033		0.323971
CD07030	Q189P9_PEPD6	Putative peptidase, U32 family OS=Peptoclostridium difficile (strain 630) GN=CD07030 PE=4 SV=1	-	3.2966e-05	2.02403e-05	2.94352e-05	3.68275e-05		0.163439		0.323243
CD12750	Q18BE1_PEPD6	GTP-sensing transcriptional pleiotropic repressor CodY OS=Peptoclostridium difficile (strain 630) GN=codY PE=3 SV=1	-	0.00152828	0.0013443	0.00120353	0.00150348		0.344641		0.321034
CD33930	Q180P1_PEPD6	23S rRNA (Uracil-5-)-methyltransferase RumA (23S rRNA(M-5-U1939)-methyltransferase) OS=Peptoclostridium difficile (strain 630) GN=rumA PE=4 SV=1	-	3.68055e-05	2.44001e-05	3.18282e-05	3.97395e-05		0.209616		0.32027
CD26000	Q182U0_PEPD6	Carbon starvation protein, CstA OS=Peptoclostridium difficile (strain 630) GN=cstA PE=4 SV=1	-	0.000120359	0.000179997	3.84938e-05	4.80203e-05		1.64465	**	0.319018	**
CD33950	PFKA_PEPD6	ATP-dependent 6-phosphofructokinase OS=Peptoclostridium difficile (strain 630) GN=pfkA PE=3 SV=1	-	0.00138743	0.00189153	0.00102256	0.00127551		0.440225		0.31889
CD13000	Q18BF9_PEPD6	Probable cytosol aminopeptidase OS=Peptoclostridium difficile (strain 630) GN=pepA PE=3 SV=1	-	0.000238134	0.000191094	0.000172037	0.000214568		0.469054		0.318718
CD01200	Q18CK9_PEPD6	Glutamine--fructose-6-phosphate aminotransferase [isomerizing] OS=Peptoclostridium difficile (strain 630) GN=glmS PE=3 SV=1	-	0.00184805	0.00254629	0.00197249	0.00245901		-0.0940124		0.31806
CD24590	Q182E6_PEPD6	Putative glucokinase, ROK family OS=Peptoclostridium difficile (strain 630) GN=CD24590 PE=4 SV=1	-	0.000179763	0.000199322	0.000189711	0.000235999		-0.0777053		0.314975	**
CD21570	Q185U3_PEPD6	Uncharacterised protein OS=Peptoclostridium difficile (strain 630) GN=CD21570 PE=4 SV=1	-		3.5096e-06	3.95349e-06	4.91464e-06		OFF		0.313957
CD12510	Q18BB1_PEPD6	Signal recognition particle receptor FtsY OS=Peptoclostridium difficile (strain 630) GN=ftsY PE=3 SV=1	-	0.000323612	0.000268597	0.000421437	0.000523735		-0.38105	**	0.31352
CD35520	Q181F2_PEPD6	Lysine--tRNA ligase OS=Peptoclostridium difficile (strain 630) GN=lysS PE=3 SV=1	-	0.00108188	0.000868045	0.00107821	0.00133593		0.0048995		0.309208	**
CD16970	Q186Q5_PEPD6	6,7-dimethyl-8-ribityllumazine synthase OS=Peptoclostridium difficile (strain 630) GN=ribH PE=3 SV=1	-	0.00155999	0.00178751	0.000974354	0.0012065		0.679016	**	0.308309
CD14590	Q18BX7_PEPD6	Putative 5-nitroimidazole antibiotic resistance protein OS=Peptoclostridium difficile (strain 630) GN=CD14590 PE=4 SV=1	-	0.000209151	0.000274667	0.000180678	0.000223345		0.211122		0.305849
CD25780	Q182R7_PEPD6	Putative serine/threonine-protein kinase and phosphatase OS=Peptoclostridium difficile (strain 630) GN=stk PE=4 SV=1	-	0.000476164	0.000366322	0.000482143	0.000595531		-0.0180002		0.304717
CD31760	Q181U0_PEPD6	RNA polymerase sigma-54 factor OS=Peptoclostridium difficile (strain 630) GN=rpoN PE=4 SV=1	-	2.73867e-05	2.64188e-05	2.57042e-05	3.16916e-05		0.0914727		0.302096
CD07490	Q189U3_PEPD6	Putative DNA helicase, UvrD/REP type OS=Peptoclostridium difficile (strain 630) GN=CD07490 PE=4 SV=1	-	4.21048e-06	1.34419e-05	1.79905e-05	2.21583e-05		-2.09517	**	0.300612
CD13550	Q18BL9_PEPD6	Cold shock protein CspB OS=Peptoclostridium difficile (strain 630) GN=cspB PE=4 SV=1	-	0.00254531	0.00175113	0.00230676	0.00284049		0.141972		0.300274	**
CD17760	Q186Y5_PEPD6	ABC-type transport system, aminoacid-family ATP-binding protein OS=Peptoclostridium difficile (strain 630) GN=CD17760 PE=4 SV=1	-	1.04487e-05		1.82008e-05	2.23735e-05		-0.800679	**	0.297792
CD27440	Q183H8_PEPD6	GTP pyrophosphokinase (RelA/SpoT) OS=Peptoclostridium difficile (strain 630) GN=relA PE=3 SV=1	-	8.43943e-05	6.85727e-05	7.37871e-05	9.06581e-05		0.193777		0.297067
CD01980	GUAA_PEPD6	GMP synthase [glutamine-hydrolyzing] OS=Peptoclostridium difficile (strain 630) GN=guaA PE=3 SV=1	-	0.00134086	0.00182619	0.00127237	0.00156264		0.0756436		0.296467
CD24670	LEPA_PEPD6	Elongation factor 4 OS=Peptoclostridium difficile (strain 630) GN=lepA PE=3 SV=1	-	0.000505892	0.000394737	0.000418157	0.00051339		0.274787		0.296011
CD13070	Q18BH2_PEPD6	Transcription elongation protein OS=Peptoclostridium difficile (strain 630) GN=nusA PE=3 SV=1	-	0.000552982	0.00036723	0.000363626	0.000446065		0.604778	**	0.294799
CD07470	Q189U5_PEPD6	Putative lipoprotein OS=Peptoclostridium difficile (strain 630) GN=CD07470 PE=4 SV=1	-	5.57894e-05	4.38796e-05	4.23414e-05	5.18719e-05		0.397921		0.292885
CD34010	Q180Q0_PEPD6	Putative phosphoesterase OS=Peptoclostridium difficile (strain 630) GN=CD34010 PE=4 SV=1	-	2.84427e-05		1.82967e-05	2.24067e-05		0.636477	**	0.292349
CD16350	Q186J1_PEPD6	Tellurium resistance protein terD1 OS=Peptoclostridium difficile (strain 630) GN=terD1 PE=4 SV=1	-	0.00154339	0.00164539	0.0016838	0.00206165		-0.125615		0.292074	**
CD27690	Q183K5_PEPD6	Putative polysaccharide biosynthesis protein OS=Peptoclostridium difficile (strain 630) GN=CD27690 PE=4 SV=1	-	9.14927e-06	5.78435e-06	1.20282e-05	1.47162e-05		-0.394698		0.290975
CD08860	Q18A77_PEPD6	Putative alpha-amylase OS=Peptoclostridium difficile (strain 630) GN=CD08860 PE=4 SV=1	-	2.82782e-05	2.47307e-05	2.73163e-05	3.34037e-05		0.049927		0.290246
CD24770	Q182G5_PEPD6	Uncharacterised protein OS=Peptoclostridium difficile (strain 630) GN=CD24770 PE=4 SV=1	-	5.53323e-05	0.000134047	4.61818e-05	5.64292e-05		0.260799		0.289118
CD21680	Q185V5_PEPD6	Hydroxylamine reductase OS=Peptoclostridium difficile (strain 630) GN=hcp PE=3 SV=1	-		1.12409e-05	1.90629e-05	2.32912e-05		OFF		0.289019
CD18460	Q187F5_PEPD6	Putative conjugative transposon protein Tn1549-like, CTn5-Orf2 OS=Peptoclostridium difficile (strain 630) GN=CD18460 PE=4 SV=1	-	3.38362e-05	2.57869e-05	1.91294e-05	2.33499e-05		0.822777	**	0.287629	**
CD25820	Q182S1_PEPD6	Putative metal-dependent peptidase OS=Peptoclostridium difficile (strain 630) GN=CD25820 PE=4 SV=2	-	9.93122e-05	9.86253e-05	0.00011452	0.000139701		-0.205562		0.286733
CD02650	Q18D07_PEPD6	Site-determining protein OS=Peptoclostridium difficile (strain 630) GN=flhG PE=3 SV=1	-	5.09652e-05	3.0864e-05	4.40073e-05	5.35631e-05		0.211769		0.283496
CD13071	Q18BH1_PEPD6	Uncharacterised protein OS=Peptoclostridium difficile (strain 630) GN=CD13071 PE=4 SV=1	-		5.0863e-05	4.53845e-05	5.5231e-05		OFF		0.283278
CD32230	Q17ZW8_PEPD6	4-hydroxy-tetrahydrodipicolinate synthase OS=Peptoclostridium difficile (strain 630) GN=dapA2 PE=3 SV=1	-	0.00145359	0.00240257	0.00145197	0.00176414		0.00160595		0.280948
CD31480	Q184Y4_PEPD6	Uncharacterized protein OS=Peptoclostridium difficile (strain 630) GN=CD31480 PE=4 SV=1	-	5.14296e-06	9.83564e-06	4.98208e-06	6.05115e-06		0.0458514		0.280463
CD08420	Q18A38_PEPD6	Uncharacterized protein OS=Peptoclostridium difficile (strain 630) GN=CD08420 PE=4 SV=1	-	1.07871e-05	2.11183e-05	9.47576e-06	1.14926e-05		0.18699		0.278398
CD29720	Q184G4_PEPD6	Uncharacterized protein OS=Peptoclostridium difficile (strain 630) GN=CD29720 PE=4 SV=1	-	6.21055e-05	3.88805e-05	5.33264e-05	6.46287e-05		0.219871		0.277327
CD12890	Q18BF6_PEPD6	Ribonuclease J family protein OS=Peptoclostridium difficile (strain 630) GN=CD12890 PE=4 SV=1	-	0.000551708	0.000684791	0.000760027	0.0009202		-0.462147		0.275895
CD20680	Q188D7_PEPD6	ABC-type transport system, ATP-binding protein OS=Peptoclostridium difficile (strain 630) GN=CD20680 PE=4 SV=1	-	0.000610349	0.00055385	0.000606376	0.000733962		0.00942308		0.275493
CD16140	Q186G9_PEPD6	ABC-type transport system, ATP-binding protein OS=Peptoclostridium difficile (strain 630) GN=CD16140 PE=4 SV=1	-	5.1308e-05	6.08454e-05	4.49249e-05	5.43639e-05		0.191667		0.275133
CD07010	Q189P5_PEPD6	Putative cell-division protein OS=Peptoclostridium difficile (strain 630) GN=CD07010 PE=4 SV=1	-	5.01488e-05	7.31323e-05	0.000100482	0.000121339		-1.00264	**	0.27211
CD25760	Q182R5_PEPD6	Putative ribosome biogenesis GTPase RsgA OS=Peptoclostridium difficile (strain 630) GN=rsgA PE=3 SV=1	-	2.53537e-05	7.3998e-05	4.43683e-05	5.35273e-05		-0.807332	**	0.270744
CD20280	Q187Z6_PEPD6	Putative aspartate racemase RacX OS=Peptoclostridium difficile (strain 630) GN=racX PE=4 SV=1	-	0.000233843	0.000159653	0.000169904	0.000204721		0.46082		0.268938
CD14010	Q18BR6_PEPD6	Putative isochorismatase OS=Peptoclostridium difficile (strain 630) GN=CD14010 PE=4 SV=1	-	0.000161706	0.000223546	0.000169843	0.000204615		-0.0708224		0.26871
CD11280	Q18AY7_PEPD6	DNA polymerase OS=Peptoclostridium difficile (strain 630) GN=polA PE=3 SV=1	-	0.000221	0.000140841	0.000183558	0.000221027		0.267816		0.267988
CD12000	Q18B62_PEPD6	Uncharacterized protein OS=Peptoclostridium difficile (strain 630) GN=CD12000 PE=4 SV=1	-	0.00079254	0.000613457	0.00049489	0.000595712		0.679378		0.267507
CD12280	Q18B88_PEPD6	Putative peptidase, U32 family OS=Peptoclostridium difficile (strain 630) GN=CD12280 PE=4 SV=1	-	0.000139261	9.65971e-05	9.91276e-05	0.000119305		0.490438		0.267301
CD34230	Q180S1_PEPD6	Cobalt-precorrin-6A reductase OS=Peptoclostridium difficile (strain 630) GN=cbiJ PE=4 SV=1	-	5.04764e-05	2.13473e-05	4.25729e-05	5.11978e-05		0.245675		0.266146
CD24480	Q182D3_PEPD6	Putative MiaB-like tRNA modifying enzyme OS=Peptoclostridium difficile (strain 630) GN=CD24480 PE=4 SV=1	-	8.99844e-05	5.58539e-05	8.16645e-05	9.81319e-05		0.139966		0.265014
CD19970	Q187V8_PEPD6	Putative proline iminopeptidase (PIP), S33 family OS=Peptoclostridium difficile (strain 630) GN=CD19970 PE=4 SV=1	-	4.8357e-05	4.0821e-05	1.55903e-05	1.87106e-05		1.63307	**	0.263205
CD16990	Q186Q6_PEPD6	Riboflavin synthase alpha subunit OS=Peptoclostridium difficile (strain 630) GN=ribE PE=4 SV=1	-	0.000128286	0.00015486	0.000134216	0.000160819		-0.0651937		0.260888
CD22520	EAM_PEPD6	Glutamate 2,3-aminomutase OS=Peptoclostridium difficile (strain 630) GN=eam PE=1 SV=1	-	0.00241715	0.00287483	0.00119619	0.00143325		1.01486	**	0.260844
CD07910	Q189Y5_PEPD6	Uncharacterized protein OS=Peptoclostridium difficile (strain 630) GN=CD07910 PE=4 SV=1	-	6.70542e-05	8.02295e-05	6.69324e-05	8.01916e-05		0.00262184		0.260746
CD28420	Q183S8_PEPD6	Nitrilase (Carbon-nitrogen hydrolase) OS=Peptoclostridium difficile (strain 630) GN=CD28420 PE=4 SV=1	-	0.000102714	0.000375758	0.000172694	0.00020676		-0.749584	**	0.25974
CD17820	Q186Z2_PEPD6	Two-component response regulator OS=Peptoclostridium difficile (strain 630) GN=CD17820 PE=4 SV=1	-	0.000179303	0.000181556	0.00017237	0.000206014		0.0568896		0.257234
CD12050	Q18B64_PEPD6	Geranyltranstransferase OS=Peptoclostridium difficile (strain 630) GN=ispA PE=3 SV=1	-	0.000173359	0.000166619	0.000163786	0.000195594		0.0819447		0.256048
CD14090	CINA_PEPD6	Putative competence-damage inducible protein OS=Peptoclostridium difficile (strain 630) GN=cinA PE=3 SV=1	-	0.000225495	0.00026604	0.000153483	0.000183271		0.555021	**	0.255904
CD00750	RL23_PEPD6	50S ribosomal protein L23 OS=Peptoclostridium difficile (strain 630) GN=rplW PE=3 SV=1	-	0.0032379	0.00299403	0.00229273	0.0027371		0.497987	**	0.255581
CD29260	Q184B5_PEPD6	Putative phage protein OS=Peptoclostridium difficile (strain 630) GN=CD29260 PE=4 SV=1	-		1.54515e-05	2.25601e-05	2.69294e-05		OFF		0.255408
CD14170	Q18BT6_PEPD6	Putative ATP-binding protein OS=Peptoclostridium difficile (strain 630) GN=CD14170 PE=4 SV=1	-	0.000123961	0.000211116	0.000155011	0.000184925		-0.322487		0.254569
CD11430	Y1143_PEPD6	Maf-like protein CD11430 OS=Peptoclostridium difficile (strain 630) GN=CD11430 PE=3 SV=1	-	5.72685e-05	5.61353e-05	5.22116e-05	6.22768e-05		0.133372		0.254325
CD00830	RL24_PEPD6	50S ribosomal protein L24 OS=Peptoclostridium difficile (strain 630) GN=rplX PE=3 SV=2	-	0.00261167	0.00208512	0.00230564	0.00274804		0.179809		0.253237
CD02280	Q18CW8_PEPD6	Flagellar motor switch protein FliN OS=Peptoclostridium difficile (strain 630) GN=fliN PE=4 SV=1	-	0.000130227	0.00012267	0.000116611	0.000138985		0.159322		0.253221
CD01910	Q18CT2_PEPD6	Putative DNA glycosylase OS=Peptoclostridium difficile (strain 630) GN=CD01910 PE=4 SV=1	-	0.000217223	0.000204715	0.000148609	0.000176925		0.54765		0.25161
CD15510	Q18C72_PEPD6	Imidazole glycerol phosphate synthase subunit HisH OS=Peptoclostridium difficile (strain 630) GN=hisH PE=3 SV=1	-	9.2869e-05	0.00010319	0.00010383	0.000123538		-0.160958		0.250723
CD17800	Q186Y7_PEPD6	Putative RNA methylase OS=Peptoclostridium difficile (strain 630) GN=CD17800 PE=1 SV=1	-	0.000132237	0.000218498	0.000100213	0.000119116		0.40006		0.249298
CD13920	Q18BR0_PEPD6	Putative endoribonuclease OS=Peptoclostridium difficile (strain 630) GN=CD13920 PE=4 SV=1	-	0.00103778	0.00108715	0.000974848	0.00115796		0.0902541		0.24834
CD22540	Q185C8_PEPD6	Asp/Glu racemase OS=Peptoclostridium difficile (strain 630) GN=CD22540 PE=4 SV=1	-	2.52344e-05	7.03703e-05	1.93727e-05	2.29908e-05		0.381365	**	0.24703
CD34090	Q180Q7_PEPD6	HPr kinase/phosphorylase OS=Peptoclostridium difficile (strain 630) GN=hprK PE=3 SV=1	-	0.000116684	0.000133472	0.000104236	0.000123634		0.162755		0.246225
CD00480	ISPF_PEPD6	2-C-methyl-D-erythritol 2,4-cyclodiphosphate synthase OS=Peptoclostridium difficile (strain 630) GN=ispF PE=3 SV=1	-	5.95968e-05	5.35103e-05	6.19557e-05	7.33982e-05		-0.0560012		0.244507
CD05540	Q188Z9_PEPD6	Signal peptidase I OS=Peptoclostridium difficile (strain 630) GN=sip2 PE=3 SV=1	-	7.81078e-05	4.49879e-05	4.67312e-05	5.53563e-05		0.74108	**	0.24436
CD00550	Q18CE0_PEPD6	Putative tRNA/rRNA methyltransferase, TrmH family, group3 OS=Peptoclostridium difficile (strain 630) GN=CD00550 PE=4 SV=1	-	0.000108653	0.000116583	0.000103656	0.000122694		0.0679211		0.243254
CD12230	DEOB_PEPD6	Phosphopentomutase OS=Peptoclostridium difficile (strain 630) GN=deoB PE=3 SV=1	-	4.89413e-05	4.42189e-05	4.17354e-05	4.93804e-05		0.229778		0.242667
CD25620	Q182Q1_PEPD6	Uncharacterized protein OS=Peptoclostridium difficile (strain 630) GN=CD25620 PE=4 SV=1	-	0.000458881	0.000594898	0.00033107	0.000391428		0.470984		0.241611
CD01100	Q18CK0_PEPD6	Uncharacterized protein OS=Peptoclostridium difficile (strain 630) GN=CD01100 PE=4 SV=1	-	2.63062e-05	2.5001e-05	2.64546e-05	3.1267e-05		-0.00811687		0.241122
CD25730	Q182R1_PEPD6	Putative hydrolase, HAD superfamily, subfamily IA OS=Peptoclostridium difficile (strain 630) GN=CD25730 PE=4 SV=1	-	4.43657e-05	5.56916e-05	5.5891e-05	6.5971e-05		-0.33317		0.239216
CD10830	Q18AT4_PEPD6	PTS system, IIB component OS=Peptoclostridium difficile (strain 630) GN=CD10830 PE=4 SV=1	-	1.60226e-05	3.20898e-05	1.85117e-05	2.18424e-05		-0.208332		0.238697
CD17140	Q186S3_PEPD6	Cyclic pyranopterin monophosphate synthase accessory protein OS=Peptoclostridium difficile (strain 630) GN=moaC PE=3 SV=1	-	1.57786e-05		2.09484e-05	2.47014e-05		-0.408866		0.237756
CD24330	SYGA_PEPD6	Glycine--tRNA ligase alpha subunit OS=Peptoclostridium difficile (strain 630) GN=glyQ PE=3 SV=1	-	0.000598461	0.000588738	0.000444978	0.000524691		0.427523		0.237734	**
CD01500	Q18CP2_PEPD6	Putative peptidase, M22 family OS=Peptoclostridium difficile (strain 630) GN=CD01500 PE=4 SV=1	-	4.46521e-05	4.42919e-05	5.06888e-05	5.97104e-05		-0.182938		0.236317
CD00670	RPOC_PEPD6	DNA-directed RNA polymerase subunit beta' OS=Peptoclostridium difficile (strain 630) GN=rpoC PE=3 SV=1	-	0.00227334	0.00142574	0.0016298	0.00191699		0.480118		0.234146
CD26270	Q182W2_PEPD6	UPF0237 protein CD26270 OS=Peptoclostridium difficile (strain 630) GN=CD26270 PE=3 SV=1	-	0.000653172	0.00066706	0.000492365	0.000579119		0.407734		0.234131
CD34000	Y3400_PEPD6	UPF0042 nucleotide-binding protein CD34000 OS=Peptoclostridium difficile (strain 630) GN=CD34000 PE=3	-	0.000186719	0.000235489	0.000166281	0.000195402		0.167246		0.232821	**
CD27450	APT_PEPD6	Adenine phosphoribosyltransferase OS=Peptoclostridium difficile (strain 630) GN=apt PE=3 SV=1	-	0.000149181	0.000122032	0.000102661	0.00012048		0.539177	**	0.230913
CD15790	Q186D3_PEPD6	Two-component sensor histidine kinase,sporulation-associated spo0A OS=Peptoclostridium difficile (strain 630) GN=CD15790 PE=4 SV=1	-	5.33291e-05	5.11372e-05	7.07998e-05	8.30413e-05		-0.408824		0.230082
CD08760	Q18A71_PEPD6	ABC-type transport system, sugar-family extracellular solute-binding protein OS=Peptoclostridium difficile (strain 630) GN=CD08760 PE=4 SV=1	-	0.000162004	0.000112153	0.00010464	0.000122706		0.630591		0.229771
CD02910	Q18D33_PEPD6	Putative peptidase, M20A family OS=Peptoclostridium difficile (strain 630) GN=CD02910 PE=4 SV=1	-	0.000845188	0.000713043	0.000587874	0.000688866		0.523764		0.228716
CD34400	Q180T9_PEPD6	Putative glycoside hydrolase-type carbohydrate-binding protein OS=Peptoclostridium difficile (strain 630) GN=CD34400 PE=4 SV=1	-	0.000389177	0.000523162	0.000383091	0.000448816		0.0227418		0.228437
CD09100	Q18AA3_PEPD6	Putative phage protein OS=Peptoclostridium difficile (strain 630) GN=CD09100 PE=4 SV=1	-	3.7813e-05	5.6465e-05	4.38738e-05	5.13537e-05		-0.214476		0.227111	**
CD34600	Q180V7_PEPD6	Transketolase, thiamine diphosphate binding subunit OS=Peptoclostridium difficile (strain 630) GN=tkt3 PE=4 SV=1	-	0.000858642	0.000776569	0.000802	0.000938366		0.0984546		0.226548	**
CD23220	Q185J6_PEPD6	Transketolase, N-terminal (Sedoheptulose-7-phosphate:D-glyceraldehyde-3-phosphate glycolaldehydetransferase) OS=Peptoclostridium difficile (strain 630) GN=tkt1 PE=4 SV=1	-	0.00153451	0.00128537	0.00125106	0.00146375		0.294627		0.226518	**
CD07710	Q189W4_PEPD6	Anti-sigma F factor (Stage II sporulation protein AB) OS=Peptoclostridium difficile (strain 630) GN=spoIIAB PE=4 SV=1	-	7.28025e-05	7.35183e-05	5.86173e-05	6.85148e-05		0.312661		0.22509
CD04030	Q188J1_PEPD6	Fructose-1,6-bisphosphate aldolase OS=Peptoclostridium difficile (strain 630) GN=fba PE=4 SV=1	-	0.00397806	0.00664933	0.00469778	0.00548715		-0.239914		0.224077
CD04220	Q188L3_PEPD6	Putative conjugative transposon protein Tn1549-like, CTn2-Orf17 OS=Peptoclostridium difficile (strain 630) GN=CD04220 PE=4 SV=2	-	0.000218025	0.000219064	0.000162641	0.000189803		0.422799		0.222811
CD14940	Q18C15_PEPD6	Transcriptional regulator, HTH-type OS=Peptoclostridium difficile (strain 630) GN=CD14940 PE=4 SV=2	-	0.000377811	0.000548459	0.000344559	0.000401911		0.132912		0.222125
CD07040	Q189P8_PEPD6	Putative metal-dependent phosphohydrolase OS=Peptoclostridium difficile (strain 630) GN=CD07040 PE=4 SV=1	-	3.71948e-05	3.2226e-05	4.69715e-05	5.47665e-05		-0.336682		0.221509
CD27800	Q183L5_PEPD6	Alpha-phosphoglucomutase OS=Peptoclostridium difficile (strain 630) GN=pgmA PE=3 SV=1	-	0.00011547	0.000137734	0.000110907	0.00012929		0.0581662		0.22126
CD14050	Q18BS1_PEPD6	ABC-type transport system, ATP-binding protein OS=Peptoclostridium difficile (strain 630) GN=CD14050 PE=3 SV=1	-	9.11024e-05	7.45592e-05	8.32796e-05	9.69739e-05		0.129526		0.219634
CD11500	Q18B12_PEPD6	Site-determining protein OS=Peptoclostridium difficile (strain 630) GN=minD PE=3 SV=1	-	0.000307642	0.000274466	0.000301317	0.000350593		0.0299727		0.218518
CD02320	Q18CX5_PEPD6	Flagellar hook-associated protein FlgL (Or HAP3) OS=Peptoclostridium difficile (strain 630) GN=flgL PE=4 SV=1	-	0.000112635	0.000133678	0.000155257	0.000180455		-0.463002	**	0.216977
CD25180	Q182K4_PEPD6	Cell surface protein cwp29 OS=Peptoclostridium difficile (strain 630) GN=cwp29 PE=4 SV=1	-	1.84751e-05	2.89682e-05	1.7075e-05	1.98449e-05		0.1137		0.216883
CD03920	Q188H9_PEPD6	Putative radical SAM-family protein OS=Peptoclostridium difficile (strain 630) GN=CD03920 PE=4 SV=1	-	0.0014115	0.00215146	0.00171361	0.00199148		-0.279809		0.216802
CD27350	Q183H0_PEPD6	Putative cell wall-binding protein cwp14 OS=Peptoclostridium difficile (strain 630) GN=cwp14 PE=4 SV=1	-	6.72154e-05	0.000105096	6.72838e-05	7.81543e-05		-0.0014662		0.216066
CD11640	OBG_PEPD6	GTPase Obg OS=Peptoclostridium difficile (strain 630) GN=obg PE=3 SV=1	-	0.000211474	0.000101039	0.000107669	0.000125026		0.973882	**	0.215625
CD19930	Q187V4_PEPD6	Putative decarboxylase OS=Peptoclostridium difficile (strain 630) GN=CD19930 PE=4 SV=1	-	0.000498849	0.000609152	0.000551374	0.000639761		-0.144428		0.214502
CD01860	PYRDB_PEPD6	Dihydroorotate dehydrogenase B (NAD(+)), catalytic subunit OS=Peptoclostridium difficile (strain 630) GN=pyrD	-	0.000208944	0.000276227	0.000187186	0.000217116		0.158644		0.213993
CD14680	Q18BY8_PEPD6	Putative iron-sulfur protein OS=Peptoclostridium difficile (strain 630) GN=CD14680 PE=4 SV=1	-	3.30606e-05	1.85458e-05	3.963e-05	4.59601e-05		-0.261479		0.21379
CD14190	Q18BU0_PEPD6	Putative diguanylate kinase signaling protein OS=Peptoclostridium difficile (strain 630) GN=CD14190 PE=4 SV=1	-	1.30749e-05	1.44945e-05	1.38411e-05	1.6046e-05		-0.0821638		0.213251
CD32260	Q17ZX1_PEPD6	4-hydroxy-tetrahydrodipicolinate reductase OS=Peptoclostridium difficile (strain 630) GN=dapB PE=3 SV=1	-	0.000492403	0.000507414	0.000420094	0.000486697		0.229125		0.212312
CD36590	Q181R1_PEPD6	Putative signal transduction phosphoesterase OS=Peptoclostridium difficile (strain 630) GN=CD36590 PE=4 SV=1	-	4.73245e-05	3.20775e-05	4.25925e-05	4.93393e-05		0.151988		0.212138
CD06920	Q189N7_PEPD6	Putative metallo-hydrolase/oxidoreductase OS=Peptoclostridium difficile (strain 630) GN=CD06920 PE=4 SV=1	-	3.02576e-05	5.3248e-05	3.46185e-05	4.00749e-05		-0.194246		0.211155
CD17470	Q186V5_PEPD6	Adenosine deaminase OS=Peptoclostridium difficile (strain 630) GN=add PE=3 SV=1	-	1.51253e-05	1.97628e-05	2.16199e-05	2.50252e-05		-0.5154		0.211017
CD23050	Q185H8_PEPD6	Putative pilin protein OS=Peptoclostridium difficile (strain 630) GN=CD23050 PE=4 SV=1	-	8.77373e-05	8.08564e-05	4.59627e-05	5.31036e-05		0.932727	**	0.208347
CD35130	Q181B2_PEPD6	Putative pilin protein OS=Peptoclostridium difficile (strain 630) GN=CD35130 PE=4 SV=1	-	0.000263513	0.000457122	0.000378812	0.00043708		-0.523606		0.206414
CD10350	Q18AN5_PEPD6	Putative N-acetylmuramoyl-L-alanine amidase,autolysin cwp16 OS=Peptoclostridium difficile (strain 630) GN=cwp16 PE=4 SV=2	-	0.00043132	0.000313885	0.000319334	0.000368063		0.43369	**	0.204884
CD10360	Q18AN8_PEPD6	Putative N-acetylmuramoyl-L-alanine amidase,autolysin cwp17 OS=Peptoclostridium difficile (strain 630) GN=cwp17 PE=4 SV=2	-	0.00043132	0.000313885	0.000319334	0.000368063		0.43369	**	0.204884
CD20560	Q188C6_PEPD6	Putative membrane protein OS=Peptoclostridium difficile (strain 630) GN=CD20560 PE=4 SV=1	-	0.00017691	0.000142068	0.00012864	0.000148243		0.459678	**	0.20463
CD17830	Q186Z1_PEPD6	Two-component sensor histidine kinase OS=Peptoclostridium difficile (strain 630) GN=CD17830 PE=4 SV=1	-	3.32086e-05	2.35109e-05	3.18997e-05	3.6727e-05		0.0580124		0.203296
CD11630	RL27_PEPD6	50S ribosomal protein L27 OS=Peptoclostridium difficile (strain 630) GN=rpmA PE=3 SV=1	-	0.00274286	0.00236352	0.00166704	0.00191777		0.718396	**	0.202146
CD22590	Q185D2_PEPD6	Cupin domain protein OS=Peptoclostridium difficile (strain 630) GN=CD22590 PE=4 SV=1	-	7.7144e-05	6.18044e-05	5.64344e-05	6.49182e-05		0.450979		0.202048
CD00460	Q18CC7_PEPD6	Putative lipoate-protein ligase OS=Peptoclostridium difficile (strain 630) GN=CD00460 PE=4 SV=1	-	3.24888e-05	4.15422e-05	2.51175e-05	2.88897e-05		0.371251	**	0.20186
CD12810	MNMA_PEPD6	tRNA-specific 2-thiouridylase MnmA OS=Peptoclostridium difficile (strain 630) GN=mnmA PE=3 SV=1	-	9.51015e-05	0.000107508	7.20857e-05	8.28263e-05		0.399755		0.200376
CD16340	Q186I7_PEPD6	Tellurium resistance protein terD OS=Peptoclostridium difficile (strain 630) GN=terD PE=4 SV=1	-	0.00112997	0.00116098	0.0012818	0.00147267		-0.181882		0.200261
CD30840	Q184S0_PEPD6	Glycerate kinase OS=Peptoclostridium difficile (strain 630) GN=garK PE=3 SV=1	-	1.19732e-05	1.43101e-05	1.22677e-05	1.40832e-05		-0.0350515		0.199111
CD14520	Q18BX4_PEPD6	2-amino-4-hydroxy-6-hydroxymethyldihydropteridinepyrophosphokinase OS=Peptoclostridium difficile (strain 630) GN=folK PE=4 SV=1	-	9.21971e-06	5.72755e-06	1.13048e-05	1.29753e-05		-0.294138		0.198832
CD10810	Q18AT6_PEPD6	Molybdenum cofactor biosynthesis protein OS=Peptoclostridium difficile (strain 630) GN=moeA PE=4 SV=1	-	1.41757e-05	1.48064e-05	2.67432e-05	3.06929e-05		-0.915755	**	0.198732	**
CD36080	Q181L0_PEPD6	ABC-type transport system, ATP-binding protein OS=Peptoclostridium difficile (strain 630) GN=CD36080 PE=3 SV=1	-	9.87696e-05	0.000123245	9.51257e-05	0.000109126		0.0542309		0.198088
CD02740	Q18D18_PEPD6	Putative iron-containing alcohol dehydrogenase OS=Peptoclostridium difficile (strain 630) GN=CD02740 PE=4 SV=1	-	5.08746e-05	8.98997e-05	8.02023e-05	9.19974e-05		-0.656698		0.19795
CD03370	Q18D74_PEPD6	ABC-type transport system, permease OS=Peptoclostridium difficile (strain 630) GN=CD03370 PE=4 SV=1	-	1.23006e-06	9.14627e-07	1.38018e-06	1.58313e-06		-0.166124		0.197926
CD00840	Q18CH2_PEPD6	50S ribosomal protein L5 OS=Peptoclostridium difficile (strain 630) GN=rplE PE=3 SV=1	-	0.00606072	0.0052759	0.00455914	0.00522742		0.410727	**	0.197337
CD02870	Q18D28_PEPD6	PTS system, mannose/fructose/sorbose IIB component OS=Peptoclostridium difficile (strain 630) GN=CD02870 PE=4 SV=1	-	0.00834009	0.00446959	0.00415693	0.00476609		1.00454	**	0.197286
CD14250	Q18BU8_PEPD6	Putative magnesium transporter OS=Peptoclostridium difficile (strain 630) GN=CD14250 PE=4 SV=1	-	1.89182e-06	1.05894e-05	4.16449e-06	4.7711e-06		-1.13837		0.196182
CD32250	Q17ZX0_PEPD6	4-hydroxy-tetrahydrodipicolinate synthase OS=Peptoclostridium difficile (strain 630) GN=dapA3 PE=3 SV=1	-	0.00131385	0.00227247	0.00135321	0.00154856		-0.042587		0.194536
CD02730	Q18D10_PEPD6	Heat shock protein 90 (Heat shock protein HtpG)(High temperature protein G) OS=Peptoclostridium difficile (strain 630) GN=htpG PE=4 SV=1	-	0.00202485	0.00158502	0.00153525	0.00175635		0.399339		0.194104
CD01870	PYRE_PEPD6	Orotate phosphoribosyltransferase OS=Peptoclostridium difficile (strain 630) GN=pyrE PE=3 SV=1	-	0.000732953	0.000823074	0.000505648	0.000578233		0.535588		0.193516	**
CD00230	Q18CA8_PEPD6	Transcriptional regulator, CtsR family OS=Peptoclostridium difficile (strain 630) GN=ctsR PE=4 SV=1	-	8.72172e-05	2.74333e-05	2.02825e-05	2.31794e-05		2.10438		0.192608
CD25910	Q182T0_PEPD6	Low specificity L-threonine aldolase OS=Peptoclostridium difficile (strain 630) GN=ltaE PE=4 SV=1	-	0.000284512	0.000271134	0.000216547	0.000246265		0.393807		0.185529
CD29970	Q184I7_PEPD6	ABC-type transport system, iron-family ATP-binding protein OS=Peptoclostridium difficile (strain 630) GN=CD29970 PE=4 SV=1	-	2.9897e-05	2.09114e-05	1.33633e-05	1.51918e-05		1.16173	**	0.185015
CD22110	Q186A1_PEPD6	ABC-type transport system, multidrug-family ATP-binding/permease OS=Peptoclostridium difficile (strain 630) GN=CD22110 PE=3 SV=1	-	0.00021388	7.38081e-05	0.000116059	0.00013186		0.881944	**	0.184149
CD36780	Q181T0_PEPD6	Sporulation membrane protein SpoIIIJ OS=Peptoclostridium difficile (strain 630) GN=oxaA1 PE=3 SV=1	-	0.000237343	0.000219221	0.000195509	0.000221929		0.279734	**	0.18286
CD14420	Q18BW3_PEPD6	Putative MORN repeat-containing protein OS=Peptoclostridium difficile (strain 630) GN=CD14420 PE=4 SV=1	-	6.34163e-05	6.85645e-05	7.45283e-05	8.45488e-05		-0.232934		0.181996
CD02630	Q18CZ8_PEPD6	Flagellar biosynthesis protein FlhA OS=Peptoclostridium difficile (strain 630) GN=flhA PE=4 SV=1	-	9.08814e-05	5.06258e-05	8.48719e-05	9.62824e-05		0.0986973		0.181985
CD11300	Q18AY9_PEPD6	Putative lytic transglycosylase-like protein OS=Peptoclostridium difficile (strain 630) GN=CD11300 PE=4 SV=1	-	1.94691e-05	6.22115e-06	1.49642e-05	1.69524e-05		0.379669		0.179975
CD13800	Q18BP4_PEPD6	Transporter, Major Facilitator Superfamily (MFS) OS=Peptoclostridium difficile (strain 630) GN=CD13800 PE=4 SV=2	-	3.54045e-06	2.00304e-06	2.41564e-06	2.73282e-06		0.551525		0.177983
CD03280	Q18D66_PEPD6	DNA helicase, UvrD/REP type OS=Peptoclostridium difficile (strain 630) GN=pcrA PE=4 SV=1	-	8.10501e-05	6.92147e-05	7.9642e-05	9.0033e-05		0.0252849		0.176925
CD18960	Q187K8_PEPD6	Uncharacterized protein OS=Peptoclostridium difficile (strain 630) GN=CD18960 PE=4 SV=1	-	7.83568e-06	2.0644e-05	6.82362e-06	7.71261e-06		0.19952		0.176681
CD27430	DTD_PEPD6	D-aminoacyl-tRNA deacylase OS=Peptoclostridium difficile (strain 630) GN=dtd PE=3 SV=1	-	0.000157509	0.000147956	0.000132796	0.000150034		0.246219		0.176083
CD02700	Q18D13_PEPD6	Flagellar motor switch protein FliM OS=Peptoclostridium difficile (strain 630) GN=fliM PE=4 SV=1	-	0.000140898	0.000136328	0.000153641	0.000173531		-0.124912		0.175633
CD00630	RL10_PEPD6	50S ribosomal protein L10 OS=Peptoclostridium difficile (strain 630) GN=rplJ PE=3 SV=1	-	0.00599268	0.0048146	0.00409423	0.00462415		0.549607	**	0.175594
CD36630	RS6_PEPD6	30S ribosomal protein S6 OS=Peptoclostridium difficile (strain 630) GN=rpsF PE=3 SV=1	-	0.00166784	0.00127107	0.00103557	0.00116718		0.687561		0.17261
CD35910	Q181J3_PEPD6	Carbamoyl-phosphate synthase small chain OS=Peptoclostridium difficile (strain 630) GN=carA PE=3 SV=1	-	0.000930436	0.00145866	0.000775253	0.000872466		0.26324		0.170433
CD11770	Q18B42_PEPD6	Transcriptional regulator, DeoR family (Fatty acid and phospholipid biosynthesis regulator) OS=Peptoclostridium difficile (strain 630) GN=fapR PE=4 SV=1	-	5.78198e-05	4.06199e-05	5.36295e-05	6.02757e-05		0.108537		0.168549
CD25940	Q182T4_PEPD6	ABC-type transport system, uracil-specific permease OS=Peptoclostridium difficile (strain 630) GN=uraA PE=4 SV=2	-	2.43295e-05	1.6495e-05	3.33582e-05	3.74587e-05		-0.455335		0.167259
CD00660	RPOB_PEPD6	DNA-directed RNA polymerase subunit beta OS=Peptoclostridium difficile (strain 630) GN=rpoB PE=3 SV=1	-	0.00223415	0.00167267	0.00164146	0.0018431		0.444746		0.167157
CD31580	Q184Z7_PEPD6	Transcriptional regulator, TRAP family OS=Peptoclostridium difficile (strain 630) GN=CD31580 PE=4 SV=1	-	9.87678e-05	0.000173764	0.00014672	0.000164607		-0.570949	**	0.165963
CD24060	Q181Z0_PEPD6	Putative lipoprotein OS=Peptoclostridium difficile (strain 630) GN=CD24060 PE=4 SV=1	-	3.5452e-05	3.61848e-05	2.21509e-05	2.48503e-05		0.678503		0.165898
CD00010	Q18C85_PEPD6	Chromosomal replication initiator protein DnaA OS=Peptoclostridium difficile (strain 630) GN=dnaA PE=3 SV=1	-	0.000153405	0.000148011	0.000110082	0.00012349		0.478767		0.165811
CD31740	Q181T9_PEPD6	Glyceraldehyde-3-phosphate dehydrogenase OS=Peptoclostridium difficile (strain 630) GN=gapA PE=3 SV=1	-	0.00913755	0.0173678	0.00969319	0.0108622		-0.085164		0.164268
CD21370	RRF_PEPD6	Ribosome-recycling factor OS=Peptoclostridium difficile (strain 630) GN=frr PE=3 SV=1	-	0.00113851	0.00116521	0.00117134	0.00131236		-0.0410168		0.163997
CD00540	Q18CE1_PEPD6	Thymidylate synthase ThyX OS=Peptoclostridium difficile (strain 630) GN=thyX PE=3 SV=1	-	0.000359491	0.000316895	0.000296878	0.000332367		0.276084		0.162907	**
CD00050	Q18C89_PEPD6	DNA gyrase subunit B OS=Peptoclostridium difficile (strain 630) GN=gyrB PE=3 SV=1	-	0.000768471	0.000521504	0.000627471	0.00070202		0.292441		0.161963
CD22100	Q185Z8_PEPD6	ABC-type transport system, multidrug-family ATP-binding/permease OS=Peptoclostridium difficile (strain 630) GN=CD22100 PE=3 SV=1	-	0.000172188	8.35483e-05	0.000131411	0.00014692		0.389902		0.160949
CD34720	ATPF_PEPD6	ATP synthase subunit b OS=Peptoclostridium difficile (strain 630) GN=atpF PE=3 SV=2	-	0.000443673	0.000482336	0.000319751	0.000357477		0.472548		0.160903
CD26320	Q182W6_PEPD6	GTPase Der OS=Peptoclostridium difficile (strain 630) GN=der PE=3 SV=1	-	0.000607346	0.000435677	0.000394937	0.000441379		0.620896		0.160395
CD27840	Q183L9_PEPD6	Putative N-acetylmuramoyl-L-alanine amidase,autolysin cwp6 OS=Peptoclostridium difficile (strain 630) GN=cwp6 PE=4 SV=1	-	0.00229413	0.00188244	0.0017502	0.00195593		0.390423		0.160333
CD16380	Q186J4_PEPD6	Uncharacterized protein OS=Peptoclostridium difficile (strain 630) GN=CD16380 PE=4 SV=1	-	0.000141788	0.000113519	0.000129228	0.00014439		0.133817		0.160046
CD26910	Q183C4_PEPD6	Hypoxanthine phosphoribosyltransferase OS=Peptoclostridium difficile (strain 630) GN=hpt PE=4 SV=1	-	0.000298009	0.000183404	0.000164434	0.000183442		0.857844	**	0.157814
CD34810	Q180Y0_PEPD6	Protein-tyrosine phosphatase reductase OS=Peptoclostridium difficile (strain 630) GN=CD34810 PE=4 SV=1	-	8.76969e-05	6.33156e-05	5.70366e-05	6.35965e-05		0.620638	**	0.15706
CD02500	Q18CY9_PEPD6	Flagellar assembly protein FliH OS=Peptoclostridium difficile (strain 630) GN=fliH PE=4 SV=1	-	5.51101e-05	5.73439e-05	6.60938e-05	7.36952e-05		-0.262199		0.157056
CD12010	NUSB_PEPD6	N utilization substance protein B homolog OS=Peptoclostridium difficile (strain 630) GN=nusB PE=3 SV=1	-	0.00019257	0.000107543	0.000105967	0.000117982		0.861765	**	0.154951
CD27130	Q183E7_PEPD6	Putative cell wall protein cwp22 OS=Peptoclostridium difficile (strain 630) GN=cwp22 PE=4 SV=2	-	0.00052729	0.000591629	0.000630778	0.000701771		-0.258536	**	0.153869
CD15760	Q186D1_PEPD6	Putative esterase, SGNH hydrolase-type OS=Peptoclostridium difficile (strain 630) GN=CD15760 PE=4 SV=1	-	8.45153e-06	4.06499e-05	2.44828e-05	2.71954e-05		-1.53448		0.151591
CD09750	Q183Y0_PEPD6	Putative phage protein OS=Peptoclostridium difficile (strain 630) GN=CD09750 PE=4 SV=1	-	4.3267e-05	3.95047e-05	4.83797e-05	5.37276e-05		-0.161137		0.151261
CD11310	Q18AZ4_PEPD6	Putative solute-binding lipoprotein OS=Peptoclostridium difficile (strain 630) GN=CD11310 PE=4 SV=1	-	0.0001375	0.000126097	0.000131664	0.0001462		0.062575		0.151087
CD05740	SYT_PEPD6	Threonine--tRNA ligase OS=Peptoclostridium difficile (strain 630) GN=thrS PE=3 SV=1	-	0.00118236	0.00126173	0.00150704	0.00167201		-0.350048		0.149866
CD00120	Q18C96_PEPD6	Putative small-molecule-binding protein OS=Peptoclostridium difficile (strain 630) GN=CD00120 PE=4 SV=1	-	5.40501e-05	5.98355e-05	4.1433e-05	4.59564e-05		0.383516		0.149486
CD02360	Q18CX1_PEPD6	Flagellar protein FliS2 OS=Peptoclostridium difficile (strain 630) GN=fliS2 PE=4 SV=1	-	8.38985e-05	7.5894e-05	7.32875e-05	8.11346e-05		0.195078		0.146751
CD35980	LUXS_PEPD6	S-ribosylhomocysteine lyase OS=Peptoclostridium difficile (strain 630) GN=luxS PE=3 SV=1	-	0.000114017	0.000149674	0.000124159	0.000137332		-0.122946		0.145473
CD00060	Q18C90_PEPD6	DNA gyrase subunit A OS=Peptoclostridium difficile (strain 630) GN=gyrA PE=3 SV=1	-	0.000601029	0.000456526	0.000593314	0.000656082		0.0186388		0.14508
CD02390	Q18CX7_PEPD6	Flagellin C OS=Peptoclostridium difficile (strain 630) GN=fliC PE=4 SV=1	-	0.0115075	0.020888	0.0218979	0.0242052		-0.928221	**	0.144528
CD15490	Q18C70_PEPD6	Histidinol-phosphate aminotransferase OS=Peptoclostridium difficile (strain 630) GN=hisC PE=3 SV=1	-	0.000105085	0.000109149	0.000110464	0.000122044		-0.0720131		0.143821
CD17100	Q186R8_PEPD6	Putative NAD(P)-binding protein OS=Peptoclostridium difficile (strain 630) GN=CD17100 PE=4 SV=1	-	0.000104885	7.81276e-05	5.77668e-05	6.38045e-05		0.860488		0.143417
CD02850	Q18D23_PEPD6	PTS system, mannose/fructose/sorbose IIB component OS=Peptoclostridium difficile (strain 630) GN=CD02850 PE=4 SV=1	-	0.000808635	0.000502497	0.000525729	0.000580585		0.62117	**	0.143187
CD10800	Q18AT3_PEPD6	Putative lipoprotein OS=Peptoclostridium difficile (strain 630) GN=CD10800 PE=4 SV=1	-	0.000125718	0.000186714	0.000145175	0.000160291		-0.207594		0.142905
CD11460	Q18B04_PEPD6	Cell shape-determining protein MreC OS=Peptoclostridium difficile (strain 630) GN=mreC PE=3 SV=1	-	0.000197596	0.000167414	0.000187087	0.000206316		0.0788467		0.141151
CD34650	Q180W2_PEPD6	Uncharacterised CBS domain protein OS=Peptoclostridium difficile (strain 630) GN=CD34650 PE=4 SV=1	-	0.000104834	0.00016339	0.000143112	0.00015765		-0.44904		0.139577
CD24960	SELD_PEPD6	Selenide, water dikinase OS=Peptoclostridium difficile (strain 630) GN=selD PE=3 SV=2	-	7.95786e-05	6.14764e-05	5.23697e-05	5.7562e-05		0.603648		0.136384
CD13350	Q18BJ8_PEPD6	Transcriptional regulator, MarR family OS=Peptoclostridium difficile (strain 630) GN=CD13350 PE=4 SV=1	-	0.000100434	6.54372e-05	5.53165e-05	6.07698e-05		0.860473		0.135644
CD18370	Q187E7_PEPD6	Shikimate dehydrogenase (NADP(+)) OS=Peptoclostridium difficile (strain 630) GN=aroE1 PE=3 SV=1	-	0.000118134	8.15045e-05	9.57574e-05	0.000105116		0.302968		0.134528
CD00720	RS10_PEPD6	30S ribosomal protein S10 OS=Peptoclostridium difficile (strain 630) GN=rpsJ PE=3 SV=1	-	0.00747699	0.00658493	0.00545535	0.00598338		0.454786	**	0.133291
CD28540	Q183U1_PEPD6	Putative D-alanine transferase DltD OS=Peptoclostridium difficile (strain 630) GN=dltD PE=4 SV=1	-	3.98544e-05	4.72566e-05	3.96336e-05	4.34667e-05		0.00801603		0.133185
CD23290	TAL_PEPD6	Probable transaldolase OS=Peptoclostridium difficile (strain 630) GN=tal PE=3 SV=1	-	0.00127145	0.00157745	0.00107306	0.0011764		0.244747		0.132653
CD23300	XPT_PEPD6	Xanthine phosphoribosyltransferase OS=Peptoclostridium difficile (strain 630) GN=xpt PE=3 SV=1	-	0.00101165	0.00105443	0.000895666	0.000981329		0.175679		0.131776
CD00510	SYE_PEPD6	Glutamate--tRNA ligase OS=Peptoclostridium difficile (strain 630) GN=gltX PE=3 SV=1	-	0.000713025	0.000528105	0.000548508	0.000600681		0.37844		0.131087
CD35400	Q181D9_PEPD6	Methionine--tRNA ligase OS=Peptoclostridium difficile (strain 630) GN=metG PE=3 SV=1	-	0.00112012	0.000801024	0.00109236	0.00119432		0.0362061		0.12875
CD14540	Q18BX2_PEPD6	DNA primase OS=Peptoclostridium difficile (strain 630) GN=dnaG PE=3 SV=2	-	2.55781e-05	1.96561e-05	1.70908e-05	1.86761e-05		0.581689		0.127972
CD04020	Q188I7_PEPD6	Transcriptional regulator, sigma-54-dependent OS=Peptoclostridium difficile (strain 630) GN=CD04020 PE=4 SV=2	-	0.000108569	9.10597e-05	7.28129e-05	7.95614e-05		0.576351		0.127874
CD36620	Q181R6_PEPD6	Single-stranded DNA-binding protein OS=Peptoclostridium difficile (strain 630) GN=ssb1 PE=4 SV=1	-	0.000977544	0.000598625	0.00048581	0.000530214		1.00877	**	0.126183
CD02270	Q18CW9_PEPD6	Uncharacterized protein OS=Peptoclostridium difficile (strain 630) GN=CD02270 PE=4 SV=1	-	3.5718e-05	4.50536e-05	3.60686e-05	3.93608e-05		-0.0140938		0.126016
CD06630	Q189K5_PEPD6	Toxin A OS=Peptoclostridium difficile (strain 630) GN=tcdA PE=1 SV=1	-	1.42591e-05	6.21623e-05	1.77884e-05	1.9408e-05		-0.319053		0.125717
CD01190	GLMM_PEPD6	Phosphoglucosamine mutase OS=Peptoclostridium difficile (strain 630) GN=glmM PE=3 SV=2	-	0.000447093	0.000259329	0.000324799	0.000354266		0.461027		0.125282
CD36750	MNMG_PEPD6	tRNA uridine 5-carboxymethylaminomethyl modification enzyme MnmG OS=Peptoclostridium difficile (strain 630) GN=mnmG PE=3 SV=1	-	0.000214785	0.000165661	0.000217357	0.000236753		-0.0171762		0.123312
CD30350	Q184M4_PEPD6	Phenazine biosynthesis protein, phzf family OS=Peptoclostridium difficile (strain 630) GN=CD30350 PE=4 SV=1	-	3.67467e-05	4.5278e-05	4.61874e-05	5.02861e-05		-0.329885		0.122659
CD09860	Q18AI4_PEPD6	30S ribosomal protein S1 OS=Peptoclostridium difficile (strain 630) GN=rpsA PE=4 SV=1	-	0.00127084	0.00111546	0.00134874	0.00146764		-0.0858214		0.121887
CD20590	SYQ_PEPD6	Glutamine--tRNA ligase OS=Peptoclostridium difficile (strain 630) GN=glnS PE=3 SV=1	-	0.000460688	0.000405968	0.000557997	0.000606766		-0.276466	**	0.120885
CD16860	Q186P3_PEPD6	Transcriptional regulator, repressor-like OS=Peptoclostridium difficile (strain 630) GN=CD16860 PE=4 SV=1	-	3.44518e-05	3.19472e-05	4.28613e-05	4.66012e-05		-0.315095		0.12069
CD36320	Q181N3_PEPD6	Putative isochorismatase (2,3 dihydro-2,3 dihydroxybenzoate synthase) OS=Peptoclostridium difficile (strain 630) GN=CD36320 PE=4 SV=1	-	1.77359e-05	1.52633e-05	1.96595e-05	2.13715e-05		-0.148557		0.120458
CD34350	COBQ_PEPD6	Cobyric acid synthase OS=Peptoclostridium difficile (strain 630) GN=cobQ PE=3 SV=1	-	6.82706e-05	9.2511e-05	9.9925e-05	0.00010847		-0.549582	**	0.118382
CD18830	Q187J4_PEPD6	Transcriptional regulator, AraC family OS=Peptoclostridium difficile (strain 630) GN=CD18830 PE=4 SV=1	-	3.13089e-05	1.14909e-05	1.79689e-05	1.95054e-05		0.801071	**	0.118373
CD21810	Q185W9_PEPD6	Putative alpha/beta hydrolase OS=Peptoclostridium difficile (strain 630) GN=CD21810 PE=4 SV=1	-	0.000105288	0.000121941	0.000166723	0.000180953		-0.663105	**	0.118159
CD08320	Q18A29_PEPD6	Trans-homoaconitate synthase OS=Peptoclostridium difficile (strain 630) GN=aksA PE=3 SV=1	-	5.67322e-05	3.2579e-05	4.12399e-05	4.47589e-05		0.460127		0.118134
CD30050	Q184J6_PEPD6	Transcriptional regulator, IclR family OS=Peptoclostridium difficile (strain 630) GN=CD30050 PE=4 SV=1	-	5.51323e-05	6.41464e-05	4.47347e-05	4.85342e-05		0.301502		0.117607
CD26200	Q182V5_PEPD6	Putative RNA-binding cell division protein OS=Peptoclostridium difficile (strain 630) GN=CD26200 PE=4 SV=1	-	1.89343e-05	9.71613e-06	9.74099e-06	1.05654e-05		0.95886		0.117203
CD14210	Q18BU3_PEPD6	Putative diguanylate kinase signaling protein OS=Peptoclostridium difficile (strain 630) GN=CD14210 PE=4 SV=1	-	1.77334e-05	1.63003e-05	2.63322e-05	2.85581e-05		-0.570356		0.117072
CD10720	Q18AS5_PEPD6	M18 family aminopeptidase OS=Peptoclostridium difficile (strain 630) GN=CD10720 PE=3 SV=1	-	0.000584836	0.00059632	0.000541138	0.000586397		0.112036		0.115882
CD04360	Q188M4_PEPD6	Putative recombinase Tn1549-like, CTn2-Orf34 OS=Peptoclostridium difficile (strain 630) GN=CD04360 PE=4 SV=1	-	9.97454e-05	6.71271e-05	6.2931e-05	6.81109e-05		0.664479	**	0.114114
CD20940	Q188G1_PEPD6	Putative restriction enzyme OS=Peptoclostridium difficile (strain 630) GN=CD20940 PE=4 SV=2	-	1.05586e-05	7.17809e-06	1.18399e-05	1.28138e-05		-0.16523		0.114048
CD01040	RL13_PEPD6	50S ribosomal protein L13 OS=Peptoclostridium difficile (strain 630) GN=rplM PE=3 SV=1	-	0.00414215	0.00367642	0.00309833	0.00335117		0.418889	**	0.113176
CD26530	MURD_PEPD6	UDP-N-acetylmuramoylalanine--D-glutamate ligase OS=Peptoclostridium difficile (strain 630) GN=murD PE=3 SV=1	-	0.000278061	0.000206612	0.000237143	0.000256491		0.229644		0.113149
CD05870	Q189C9_PEPD6	Uncharacterised protein OS=Peptoclostridium difficile (strain 630) GN=CD05870 PE=4 SV=1	-		3.19749e-05	2.29306e-05	2.47734e-05		OFF		0.111515
CD19740	HFQ_PEPD6	RNA-binding protein Hfq OS=Peptoclostridium difficile (strain 630) GN=hfq PE=3 SV=1	-	0.00035534	0.000486084	0.000363249	0.000392216		-0.0317601		0.110689
CD12240	Q18B85_PEPD6	Purine nucleoside phosphorylase OS=Peptoclostridium difficile (strain 630) GN=pupG PE=3 SV=1	-	9.39928e-05	0.000106113	9.56339e-05	0.000103247		-0.0249728		0.110507
CD01700	Q18CQ9_PEPD6	ABC-type transport system, ATP-binding protein OS=Peptoclostridium difficile (strain 630) GN=CD01700 PE=3 SV=1	-	0.000166675	0.000122434	0.000116606	0.000125826		0.515397		0.109797
CD19760	Q187T7_PEPD6	DNA mismatch repair protein MutL OS=Peptoclostridium difficile (strain 630) GN=mutL PE=3 SV=1	-	7.44245e-05	6.29204e-05	6.64808e-05	7.17134e-05		0.16284		0.109305
CD17840	Q186Z4_PEPD6	tRNA pseudouridine synthase A OS=Peptoclostridium difficile (strain 630) GN=truA2 PE=3 SV=1	-	5.75679e-05	4.52953e-05	5.94181e-05	6.40616e-05		-0.0456363		0.108557
CD00580	EFTU_PEPD6	Elongation factor Tu OS=Peptoclostridium difficile (strain 630) GN=tuf1 PE=3 SV=1	-	0.035612	0.026961	0.030219	0.0325679		0.236911		0.107997
CD15280	Q18C48_PEPD6	ABC-type transport system, ATP-binding protein OS=Peptoclostridium difficile (strain 630) GN=CD15280 PE=3 SV=1	-	0.000133699	0.00011066	0.000108138	0.000116417		0.306115		0.106424
CD10040	Q18AK1_PEPD6	Fumarate hydratase class I, subunit B OS=Peptoclostridium difficile (strain 630) GN=fumB PE=4 SV=1	-	7.05242e-05	5.47991e-05	3.17558e-05	3.41835e-05		1.1511		0.106282
CD34950	Q180Z5_PEPD6	Putative RNA-binding S4 domain-containing protein OS=Peptoclostridium difficile (strain 630) GN=CD34950 PE=4 SV=2	-	2.20953e-05		1.27465e-05	1.37158e-05		0.793638		0.105737
CD13220	Q18BI5_PEPD6	Aspartokinase OS=Peptoclostridium difficile (strain 630) GN=dapG PE=3 SV=1	-	0.000702916	0.000552529	0.000587571	0.000632189		0.258589		0.105593
CD34840	RF1_PEPD6	Peptide chain release factor 1 OS=Peptoclostridium difficile (strain 630) GN=prfA PE=3 SV=1	-	0.000706382	0.000466969	0.000553199	0.000595055		0.352649		0.105223
CD10480	Q18AQ0_PEPD6	Putative phosphodiesterase OS=Peptoclostridium difficile (strain 630) GN=CD10480 PE=4 SV=1	-	5.88824e-05	7.19542e-05	6.40736e-05	6.87372e-05		-0.121894		0.101359
CD11900	Q18B56_PEPD6	Putative acetyltransferase OS=Peptoclostridium difficile (strain 630) GN=CD11900 PE=4 SV=1	-	0.000288763	0.000329156	0.000306247	0.000328232		-0.0848096		0.100023
CD18000	Q187A9_PEPD6	Tellurium resistance protein terD4 OS=Peptoclostridium difficile (strain 630) GN=terD4 PE=4 SV=1	-	0.00049686	0.00048111	0.000470545	0.00050307		0.0785072		0.0964277
CD10640	Q18AR8_PEPD6	Transcriptional regulator, LacI family OS=Peptoclostridium difficile (strain 630) GN=ccpA PE=4 SV=1	-	0.000772071	0.00119053	0.000703247	0.000751648		0.134702		0.0960269
CD16740	Q186N1_PEPD6	Putative NADPH-dependent FMN reductase OS=Peptoclostridium difficile (strain 630) GN=CD16740 PE=4 SV=1	-	7.49331e-05	8.27126e-05	0.000102978	0.000109995		-0.458661		0.0950971
CD00610	RL11_PEPD6	50S ribosomal protein L11 OS=Peptoclostridium difficile (strain 630) GN=rplK PE=3 SV=1	-	0.00435959	0.00346188	0.00327409	0.00349691		0.413101		0.0949871
CD11790	FABH_PEPD6	3-oxoacyl-[acyl-carrier-protein] synthase 3 OS=Peptoclostridium difficile (strain 630) GN=fabH PE=3 SV=1	-	0.00124207	0.000698879	0.000657011	0.000701633		0.918757	**	0.0947988
CD28430	Q183S7_PEPD6	Putative zinc-binding dehydrogenase OS=Peptoclostridium difficile (strain 630) GN=CD28430 PE=4 SV=1	-	0.000221223	0.000226222	0.000156565	0.000167192		0.498742		0.0947508
CD23370	Q185L0_PEPD6	Putative membrane protein OS=Peptoclostridium difficile (strain 630) GN=CD23370 PE=4 SV=1	-	4.20543e-05	3.55973e-05	3.35724e-05	3.57991e-05		0.324977		0.0926467
CD17310	Q186T8_PEPD6	Putative acetyltransferase OS=Peptoclostridium difficile (strain 630) GN=CD17310 PE=4 SV=1	-	3.69344e-05	4.17716e-05	3.78001e-05	4.02379e-05		-0.0334259		0.0901635
CD00020	Q18C88_PEPD6	DNA polymerase III subunit beta OS=Peptoclostridium difficile (strain 630) GN=dnaN PE=4 SV=2	-	0.000565223	0.000842582	0.000469857	0.000500063		0.266599		0.0898899
CD12540	Q18BB7_PEPD6	UPF0109 protein CD12540 OS=Peptoclostridium difficile (strain 630) GN=CD12540 PE=3 SV=1	-			3.80974e-05	4.05306e-05		OFF		0.0893191
CD22280	Q186B9_PEPD6	Uncharacterised protein OS=Peptoclostridium difficile (strain 630) GN=CD22280 PE=4 SV=1	-	4.23155e-05	5.60458e-05	4.2192e-05	4.48787e-05		0.00421624		0.0890604
CD02340	CSRA_PEPD6	Carbon storage regulator homolog OS=Peptoclostridium difficile (strain 630) GN=csrA PE=3 SV=1	-	7.73493e-05	0.000100699	0.000106389	0.000113159		-0.459892		0.0890044
CD08250	Q18A24_PEPD6	Rubrerythrin OS=Peptoclostridium difficile (strain 630) GN=rbr PE=4 SV=1	-	0.075421	0.0796575	0.075142	0.0798258		0.00534588		0.087235
CD32740	Q180B7_PEPD6	Ferrous iron transport protein B OS=Peptoclostridium difficile (strain 630) GN=feoB2 PE=4 SV=1	-	0.000663393	0.000387127	0.000320382	0.000340165		1.05007	**	0.0864437
CD35890	Q181J1_PEPD6	Carbamoyl-phosphate synthase small chain OS=Peptoclostridium difficile (strain 630) GN=carA PE=3 SV=1	-	0.00101789	0.00146903	0.000892126	0.000946927		0.190265		0.0860058
CD24630	HRCA_PEPD6	Heat-inducible transcription repressor HrcA OS=Peptoclostridium difficile (strain 630) GN=hrcA PE=3 SV=1	-	0.000105737	4.67044e-05	1.38626e-05	1.47053e-05		2.93122	**	0.0851411
CD07370	Q189T7_PEPD6	Histidinol-phosphatase (HolPase) OS=Peptoclostridium difficile (strain 630) GN=hisK PE=4 SV=1	-	2.62774e-05	1.61467e-05	2.36944e-05	2.51331e-05		0.149273		0.0850419
CD33980	Q180P7_PEPD6	Putative hydrolase, NUDIX family OS=Peptoclostridium difficile (strain 630) GN=CD33980 PE=3 SV=1	-	9.07644e-05	8.1884e-05	9.67053e-05	0.000102553		-0.0914675		0.0847097
CD24320	SYGB_PEPD6	Glycine--tRNA ligase beta subunit OS=Peptoclostridium difficile (strain 630) GN=glyS PE=3 SV=1	-	0.00126489	0.00121826	0.00118584	0.00125644		0.0931095		0.0834294
CD07530	Q189U9_PEPD6	Cysteine desulfurase OS=Peptoclostridium difficile (strain 630) GN=iscS1 PE=4 SV=1	-	0.000103394	9.50868e-05	6.95221e-05	7.36603e-05		0.57261		0.0834151
CD17080	Q186R6_PEPD6	Rela/spot domain protein OS=Peptoclostridium difficile (strain 630) GN=CD17080 PE=4 SV=1	-	0.000185644	0.000129748	0.000149192	0.000157967		0.315373		0.0824565
CD14030	Q18BS4_PEPD6	Putative synthetase OS=Peptoclostridium difficile (strain 630) GN=CD14030 PE=4 SV=1	-	3.87569e-05	2.69851e-05	3.94075e-05	4.16994e-05		-0.0240171		0.0815556
CD00990	RL17_PEPD6	50S ribosomal protein L17 OS=Peptoclostridium difficile (strain 630) GN=rplQ PE=3 SV=1	-	0.00246998	0.00244081	0.00162511	0.00171923		0.60396		0.0812218
CD26890	Q183C3_PEPD6	Putative lipoprotein OS=Peptoclostridium difficile (strain 630) GN=CD26890 PE=4 SV=1	-	1.89763e-05	1.60503e-05	1.19901e-05	1.26771e-05		0.662355		0.0803776
CD21230	Q185R2_PEPD6	Putative multiprotein-complex assembly TPR repeat-containing protein OS=Peptoclostridium difficile (strain 630) GN=CD21230 PE=4 SV=1	-	9.30275e-05	6.53264e-05	8.71017e-05	9.20165e-05		0.0949562		0.0791919
CD00820	RL14_PEPD6	50S ribosomal protein L14 OS=Peptoclostridium difficile (strain 630) GN=rplN PE=3 SV=1	-	0.00311154	0.00289243	0.00245345	0.00259016		0.342817		0.0782296
CD26850	Q183C1_PEPD6	Putative sporulation stage II, protein E OS=Peptoclostridium difficile (strain 630) GN=CD26850 PE=4 SV=1	-	8.66681e-05	9.01354e-05	9.3648e-05	9.88641e-05		-0.111746		0.0781995
CD35100	Q181A8_PEPD6	Putative membrane protein OS=Peptoclostridium difficile (strain 630) GN=CD35100 PE=4 SV=1	-	1.52333e-05	1.71903e-05	1.75654e-05	1.85332e-05		-0.205509		0.0773714
CD12200	Q18B82_PEPD6	Putative hydrolase, NUDIX family OS=Peptoclostridium difficile (strain 630) GN=nudF PE=3 SV=1	-	3.34729e-05		4.37196e-05	4.61247e-05		-0.385286	**	0.0772602
CD24110	PDRP_PEPD6	Putative pyruvate, phosphate dikinase regulatory protein OS=Peptoclostridium difficile (strain 630) GN=CD24110 PE=3 SV=1	-	0.000196537	0.000217444	0.000227297	0.000239731		-0.209779		0.0768332
CD21160	Q185Q6_PEPD6	GTP-binding protein BipA OS=Peptoclostridium difficile (strain 630) GN=bipA PE=4 SV=1	-	0.000506514	0.000230257	0.000353947	0.000373057		0.51707		0.0758624
CD27920	SECA2_PEPD6	Protein translocase subunit SecA 2 OS=Peptoclostridium difficile (strain 630) GN=secA2 PE=3 SV=1	-	0.000514623	0.000418751	0.000560609	0.000590616		-0.123477		0.0752272
CD03410	Q18D86_PEPD6	Uncharacterised protein OS=Peptoclostridium difficile (strain 630) GN=CD03410 PE=4 SV=1	-	6.08894e-05	0.000122869	6.50238e-05	6.8499e-05		-0.0947757		0.0751166
CD24620	GRPE_PEPD6	Protein GrpE OS=Peptoclostridium difficile (strain 630) GN=grpE PE=3 SV=1	-	0.000820272	0.000359798	0.000323783	0.000340801		1.34107	**	0.0739022
CD30660	Q184Q4_PEPD6	Transcriptional regulator, Xylose repressor OS=Peptoclostridium difficile (strain 630) GN=xylR PE=4 SV=1	-	6.41793e-06		7.87883e-06	8.27352e-06		-0.295873		0.0705206
CD11840	Q18B43_PEPD6	3-oxoacyl-[acyl-carrier-protein] synthase 2 OS=Peptoclostridium difficile (strain 630) GN=fabF PE=3 SV=1	-	0.00235358	0.00176824	0.00146179	0.00153485		0.68712		0.0703624
CD08280	Q18A21_PEPD6	Putative oxidative stress glutamate synthase OS=Peptoclostridium difficile (strain 630) GN=CD08280 PE=3 SV=1	-	0.011652	0.00783439	0.0111688	0.0117129		0.0611103		0.0686238
CD12160	Q18B78_PEPD6	Uncharacterized protein OS=Peptoclostridium difficile (strain 630) GN=CD12160 PE=4 SV=1	-	0.000239674	0.000199897	0.000159097	0.000166734		0.591164	**	0.067642
CD01890	Q18CS9_PEPD6	Transcriptional regulator, LysR family OS=Peptoclostridium difficile (strain 630) GN=CD01890 PE=4 SV=1	-	2.28678e-05	3.39903e-05	2.17149e-05	2.27311e-05		0.074632		0.0659819
CD26630	Q182Z6_PEPD6	Putative signaling protein OS=Peptoclostridium difficile (strain 630) GN=CD26630 PE=4 SV=1	-	2.64623e-05	2.39433e-05	3.11488e-05	3.25868e-05		-0.235234		0.0651141
CD15210	Q18C40_PEPD6	Tyrosine--tRNA ligase OS=Peptoclostridium difficile (strain 630) GN=tyrS PE=3 SV=1	-	0.00070564	0.000765791	0.000655259	0.000685313		0.106866		0.0646971
CD01230	Q18CL1_PEPD6	UDP-N-acetylglucosamine 1-carboxyvinyltransferase OS=Peptoclostridium difficile (strain 630) GN=murA PE=3 SV=1	-	0.000592778	0.000459296	0.000516325	0.000539724		0.199211		0.0639412
CD07480	Q189U4_PEPD6	Putative diguanylate kinase signaling protein OS=Peptoclostridium difficile (strain 630) GN=CD07480 PE=4 SV=1	-	2.88274e-06	6.69607e-06	6.41183e-06	6.70102e-06		-1.15329	**	0.0636445
CD13270	Q18BJ1_PEPD6	CDP-diacylglycerol--glycerol-3-phosphate 3-phosphatidyltransferase OS=Peptoclostridium difficile (strain 630) GN=pgsA PE=3 SV=1	-	4.90324e-06	1.26504e-05	8.48657e-06	8.86778e-06		-0.791446		0.0633921
CD34770	Q180X5_PEPD6	Putative dCMP deaminase OS=Peptoclostridium difficile (strain 630) GN=CD34770 PE=4 SV=1	-	0.00010891	9.21017e-05	8.66338e-05	9.043e-05		0.330131		0.0618717
CD00740	Q18CF9_PEPD6	50S ribosomal protein L4 OS=Peptoclostridium difficile (strain 630) GN=rplD PE=3 SV=2	-	0.00613143	0.0044989	0.004062	0.00423759		0.594032	**	0.0610546
CD08400	Q18A35_PEPD6	Putative isomerase/hydrolase OS=Peptoclostridium difficile (strain 630) GN=CD08400 PE=4 SV=1	-	0.000121482	0.000179992	0.000172285	0.000179702		-0.504055	**	0.0608098
CD19320	Q187P3_PEPD6	Putative phage integrase OS=Peptoclostridium difficile (strain 630) GN=CD19320 PE=4 SV=1	-	1.64437e-05		9.6047e-06	1.00136e-05		0.775721		0.0601444
CD25220	Q182L0_PEPD6	Ribosomal silencing factor RsfS OS=Peptoclostridium difficile (strain 630) GN=rsfS PE=3 SV=1	-	0.000193754	0.000181858	0.000174559	0.000181958		0.150513		0.0598922
CD00770	RS19_PEPD6	30S ribosomal protein S19 OS=Peptoclostridium difficile (strain 630) GN=rpsS PE=3 SV=1	-	0.00186563	0.00143448	0.00167032	0.00173971		0.159544		0.0587229
CD01110	Q18CJ9_PEPD6	Putative exported protein OS=Peptoclostridium difficile (strain 630) GN=CD01110 PE=4 SV=1	-	2.44995e-05	2.01684e-05	1.78835e-05	1.86253e-05		0.454127		0.0586357
CD18350	Q187E5_PEPD6	Chorismate synthase OS=Peptoclostridium difficile (strain 630) GN=aroC PE=3 SV=1	-	3.71317e-05	3.39795e-05	4.56178e-05	4.75065e-05		-0.296948		0.0585279
CD19100	Q187M2_PEPD6	Two-component response regulator, Ethanolamine specific OS=Peptoclostridium difficile (strain 630) GN=eutV PE=4 SV=1	-	2.75088e-05	1.46211e-05	2.12395e-05	2.2094e-05		0.373145		0.0569071
CD19720	Q187T4_PEPD6	Putative peptidase, M20A family OS=Peptoclostridium difficile (strain 630) GN=CD19720 PE=4 SV=2	-	0.000275343	0.000293237	0.000205787	0.00021388		0.42008		0.0556502
CD00090	Q18C94_PEPD6	Anti-sigma factor antagonist OS=Peptoclostridium difficile (strain 630) GN=rsbV PE=3 SV=1	-	0.000100469	0.000117903	6.88775e-05	7.15689e-05		0.544645	**	0.0553007
CD09000	Q18A90_PEPD6	ABC-type transport system, glycine betaine/carnitine/choline ATP-binding protein OS=Peptoclostridium difficile (strain 630) GN=opuCA PE=3 SV=1	-	0.000209202	0.00032794	0.000146305	0.000151954		0.515916		0.0546534
CD05590	Q189A5_PEPD6	Transcriptional regulator, ArsR family OS=Peptoclostridium difficile (strain 630) GN=CD05590 PE=4 SV=1	-	0.000207914	0.000182556	0.000218616	0.000226471		-0.07241		0.0509261
CD00181	F3Y5X0_PEPD6	Uncharacterized protein OS=Peptoclostridium difficile (strain 630) GN=CD00181 PE=4 SV=1	-		4.00522e-06	1.07735e-05	1.11601e-05		OFF		0.0508648
CD36190	Q181L9_PEPD6	Putative acyl-CoA N-acyltransferase OS=Peptoclostridium difficile (strain 630) GN=CD36190 PE=4 SV=1	-	0.000154414	0.000138555	0.000114452	0.000118543		0.432065		0.0506745
CD01450	Q18CN4_PEPD6	Putative S1 RNA-binding domain-containing protein OS=Peptoclostridium difficile (strain 630) GN=CD01450 PE=4 SV=2	-	0.000133908	7.97486e-05	0.00011545	0.000119527		0.21397		0.0500634
CD22450	Q185B5_PEPD6	Asparagine--tRNA ligase OS=Peptoclostridium difficile (strain 630) GN=asnC PE=3 SV=1	-	0.000952719	0.000876699	0.00114866	0.00118914		-0.269834		0.0499656
CD34380	Q180T7_PEPD6	Bifunctional adenosylcobalamin biosynthesis protein CobU [Adenosylcobinamide kinase Adenosylcobinamide-phosphate guanylyltransferase] OS=Peptoclostridium difficile (strain 630) GN=cobU PE=4 SV=1	-	5.40937e-05	8.77971e-05	7.34282e-05	7.5997e-05		-0.440875	**	0.0496074
CD09770	Q18AH7_PEPD6	Putative phage protein OS=Peptoclostridium difficile (strain 630) GN=CD09770 PE=4 SV=1	-	2.45553e-05	4.957e-05	5.82173e-05	6.01925e-05		-1.24542		0.0481376
CD27610	Q183J9_PEPD6	Putative N-acetylmuramoyl-L-alanine amidase OS=Peptoclostridium difficile (strain 630) GN=CD27610 PE=1 SV=1	-	4.07079e-06		5.88046e-06	6.07721e-06		-0.530618		0.047482
CD25950	PYRR_PEPD6	Bifunctional protein PyrR OS=Peptoclostridium difficile (strain 630) GN=pyrR PE=3 SV=1	-	7.81308e-05	8.91616e-05	5.09816e-05	5.26751e-05		0.615915		0.0471454
CD33000	ENGB_PEPD6	Probable GTP-binding protein EngB OS=Peptoclostridium difficile (strain 630) GN=engB PE=3 SV=2	-	0.000320895	0.000194214	0.000212155	0.000219107		0.596983	**	0.0465181
CD14360	Q18BV8_PEPD6	Putative hydrolase OS=Peptoclostridium difficile (strain 630) GN=CD14360 PE=4 SV=1	-	6.22846e-05	6.1985e-05	5.75053e-05	5.93828e-05		0.115181		0.0463521
CD20140	Q187Y2_PEPD6	Dihydroxy-acid dehydratase OS=Peptoclostridium difficile (strain 630) GN=ilvD PE=3 SV=1	-	1.49826e-05		6.93232e-06	7.14934e-06		1.11188	**	0.0444724
CD26130	Q182U6_PEPD6	Putative peptidase, M24 family OS=Peptoclostridium difficile (strain 630) GN=CD26130 PE=3 SV=1	-	0.00345646	0.00638202	0.00349632	0.00360466		-0.0165399		0.0440247
CD20240	Q187Z3_PEPD6	ABC-type transport system, multidrug-family ATP-binding protein OS=Peptoclostridium difficile (strain 630) GN=CD20240 PE=3 SV=1	-	3.64928e-05		2.14046e-05	2.20539e-05		0.769692		0.0431168
CD33770	Q180M4_PEPD6	Magnesium-transporting ATPase, P-type 1 Tn916-like, CTn7-Orf12 OS=Peptoclostridium difficile (strain 630) GN=mgtA1 PE=3 SV=1	-	0.000345605	0.000338885	0.000397034	0.000408637		-0.200139		0.0415562
CD11610	RL21_PEPD6	50S ribosomal protein L21 OS=Peptoclostridium difficile (strain 630) GN=rplU PE=3 SV=1	-	0.00645128	0.0050639	0.00448926	0.00461898		0.523106		0.041094
CD25390	RNZ_PEPD6	Ribonuclease Z OS=Peptoclostridium difficile (strain 630) GN=rnz PE=3 SV=1	-	6.93914e-05	4.79807e-05	5.40547e-05	5.5586e-05		0.360338		0.0403028
CD08180	Q18A15_PEPD6	6-phospho-beta-glucosidase OS=Peptoclostridium difficile (strain 630) GN=CD08180 PE=3 SV=1	-	0.000106395	8.71569e-05	7.50143e-05	7.70308e-05		0.504196		0.038271
CD11910	F16PC_PEPD6	Fructose-1,6-bisphosphatase class 3 OS=Peptoclostridium difficile (strain 630) GN=fbp PE=3 SV=1	-	6.40719e-05	6.88302e-05	8.13429e-05	8.35146e-05		-0.344324		0.0380115
CD31500	Q184Z0_PEPD6	Uncharacterized protein OS=Peptoclostridium difficile (strain 630) GN=CD31500 PE=4 SV=1	-	1.1331e-05	3.36218e-05	2.69044e-05	2.76187e-05		-1.24756	**	0.0378017
CD30430	Q184N0_PEPD6	Uncharacterized protein OS=Peptoclostridium difficile (strain 630) GN=CD30430 PE=4 SV=1	-	0.000110298	0.000135824	0.000133758	0.000137185		-0.278216		0.0364981
CD27170	Q183F0_PEPD6	Putative sporulation protein OS=Peptoclostridium difficile (strain 630) GN=CD27170 PE=4 SV=1	-	0.000456249	0.000354245	0.000379818	0.000389484		0.264516		0.0362587
CD00850	RS8_PEPD6	30S ribosomal protein S8 OS=Peptoclostridium difficile (strain 630) GN=rpsH PE=3 SV=1	-	0.00367206	0.00313439	0.00309615	0.00317401		0.246115		0.0358316
CD02430	Q18CY1_PEPD6	Flagella glycosylation methyltransferase domain protein OS=Peptoclostridium difficile (strain 630) GN=CD02430 PE=4 SV=1	-	0.00031736	0.000443981	0.000632712	0.000648461		-0.995428	**	0.0354693
CD24370	ERA_PEPD6	GTPase Era OS=Peptoclostridium difficile (strain 630) GN=era PE=3 SV=1	-	0.000293057	0.000218083	0.000250445	0.000256593		0.22669		0.0349877
CD04060	Q188J6_PEPD6	Putative tRNA (Uracil-5-)-methyltransferase OS=Peptoclostridium difficile (strain 630) GN=CD04060 PE=4 SV=2	-	9.04752e-05	6.1076e-05	0.000112421	0.000115088		-0.313316		0.0338211
CD34960	Q180Z4_PEPD6	Non-specific DNA-binding protein HBsu signal recognition particle-like (SRP) component OS=Peptoclostridium difficile (strain 630) GN=hupA PE=3 SV=1	-	0.00073362	0.000885862	0.000745503	0.000762996		-0.0231823		0.0334613
CD08360	Q18A31_PEPD6	Putative acetyltransferase OS=Peptoclostridium difficile (strain 630) GN=CD08360 PE=4 SV=1	-	0.000101443	6.8597e-05	6.14738e-05	6.28314e-05		0.722623		0.0315141
CD07090	MUTS2_PEPD6	Endonuclease MutS2 OS=Peptoclostridium difficile (strain 630) GN=mutS2 PE=3 SV=1	-	0.000183201	7.74878e-05	0.000111146	0.000113283		0.720972	**	0.0274682
CD18970	Q187K7_PEPD6	Uncharacterised protein OS=Peptoclostridium difficile (strain 630) GN=CD18970 PE=4 SV=1	-	6.07934e-06	6.65466e-06	5.68135e-06	5.78218e-06		0.0976796		0.0253787
CD27390	Q183H4_PEPD6	Aspartate--tRNA ligase OS=Peptoclostridium difficile (strain 630) GN=aspS PE=3 SV=1	-	0.00123722	0.000934483	0.00120255	0.00122341		0.0410122		0.0248122
CD21170	Q185Q5_PEPD6	Thioredoxin reductase OS=Peptoclostridium difficile (strain 630) GN=trxB2 PE=3 SV=1	-	0.000108447	0.00014744	9.00218e-05	9.15221e-05		0.268642		0.0238465
CD19790	Q187U0_PEPD6	ABC-type transport system, extracellular solute-binding protein OS=Peptoclostridium difficile (strain 630) GN=CD19790 PE=1 SV=1	-	0.00019713	0.000384668	0.000201502	0.000204715		-0.0316491		0.0228208
CD02120	Q18CV3_PEPD6	Putative sulfatase OS=Peptoclostridium difficile (strain 630) GN=CD02120 PE=4 SV=1	-	0.000294597	0.00029862	0.000472787	0.000480219		-0.682451	**	0.0225021
CD33090	DNLJ_PEPD6	DNA ligase OS=Peptoclostridium difficile (strain 630) GN=ligA PE=3 SV=2	-	8.95202e-05	6.68183e-05	0.000103717	0.000105312		-0.212373		0.0220182
CD21200	Q185Q7_PEPD6	Putative 2-nitropropane dioxygenase OS=Peptoclostridium difficile (strain 630) GN=CD21200 PE=4 SV=1	-	0.0003922	0.000428889	0.000327549	0.000332551		0.259876		0.0218637
CD32450	Q17ZY8_PEPD6	Transcriptional regulator, sigma-54-dependent OS=Peptoclostridium difficile (strain 630) GN=prdR PE=4 SV=1	-	4.17503e-05	6.2455e-05	7.27007e-05	7.375e-05		-0.800184		0.0206734
CD18340	AROA_PEPD6	3-phosphoshikimate 1-carboxyvinyltransferase OS=Peptoclostridium difficile (strain 630) GN=aroA PE=3 SV=1	-	6.95077e-05	4.08974e-05	5.01535e-05	5.08566e-05		0.470822	**	0.020085
CD33100	Q180F5_PEPD6	Putative D-isomer specific 2-hydroxyacid dehydrogenase OS=Peptoclostridium difficile (strain 630) GN=CD33100 PE=3 SV=1	-	0.000122212	0.000208885	0.000112689	0.000114135		0.117032		0.0183844
CD16170	Q186H1_PEPD6	Transcriptional regulator, GntR family OS=Peptoclostridium difficile (strain 630) GN=CD16170 PE=4 SV=1	-	2.30179e-05	3.14084e-05	1.83515e-05	1.85744e-05		0.326854		0.0174199
CD30910	Q184S7_PEPD6	Trehalose-6-phosphate hydrolase OS=Peptoclostridium difficile (strain 630) GN=treA PE=4 SV=1	-	2.23313e-05	2.12563e-05	2.58419e-05	2.61423e-05		-0.210643		0.0166722
CD35600	TILS_PEPD6	tRNA(Ile)-lysidine synthase OS=Peptoclostridium difficile (strain 630) GN=tilS PE=3 SV=1	-	2.01381e-05	1.92818e-05	2.0062e-05	2.0271e-05		0.00545963		0.0149535
CD01050	RS9_PEPD6	30S ribosomal protein S9 OS=Peptoclostridium difficile (strain 630) GN=rpsI PE=3 SV=1	-	0.00693183	0.00644704	0.00549896	0.00555229		0.334079	**	0.0139251
CD36490	RLMH_PEPD6	Ribosomal RNA large subunit methyltransferase H OS=Peptoclostridium difficile (strain 630) GN=rlmH PE=3 SV=1	-			1.99979e-05	2.01902e-05		OFF		0.0138109
CD35020	PTH_PEPD6	Peptidyl-tRNA hydrolase OS=Peptoclostridium difficile (strain 630) GN=pth PE=3 SV=1	-	0.000176783	0.000126868	9.95699e-05	0.000100449		0.828195	**	0.0126803
CD29500	Q184E2_PEPD6	Transcriptional regulator, HTH-type OS=Peptoclostridium difficile (strain 630) GN=CD29500 PE=4 SV=1	-	3.33525e-05	2.47597e-05	2.65416e-05	2.67357e-05		0.329535		0.0105099
CD01000	ECFA1_PEPD6	Energy-coupling factor transporter ATP-binding protein EcfA1 OS=Peptoclostridium difficile (strain 630) GN=ec	-	7.58783e-05	5.92839e-05	6.75358e-05	6.79837e-05		0.168034		0.00953575
CD18160	KCY_PEPD6	Cytidylate kinase OS=Peptoclostridium difficile (strain 630) GN=cmk PE=3 SV=1	-	0.000163835	0.000210765	0.000173241	0.000174186		-0.080545		0.00784516
CD21110	Q185Q0_PEPD6	Transcriptional regulator, DeoR family OS=Peptoclostridium difficile (strain 630) GN=CD21110 PE=4 SV=1	-	3.00121e-05	3.39592e-05	3.55228e-05	3.57104e-05		-0.243199		0.00760081
CD17640	Q186X2_PEPD6	Putative phenylalanyl-tRNA synthetase beta chain OS=Peptoclostridium difficile (strain 630) GN=CD17640 PE=4 SV=1	-	0.000283115	0.000301572	0.00028111	0.000282526		0.0102539		0.00724929
CD06710	Q189L7_PEPD6	Putative enzyme, glyoxalase family OS=Peptoclostridium difficile (strain 630) GN=CD06710 PE=4 SV=1	-	1.78965e-05	1.98128e-05	1.15634e-05	1.16184e-05		0.630113	**	0.00684624
CD23280	Q185K2_PEPD6	Transcription antiterminator, PTS operon regulator OS=Peptoclostridium difficile (strain 630) GN=CD23280 PE=4 SV=1	-	1.78002e-05	1.24882e-05	2.01915e-05	2.02751e-05		-0.181856		0.00595847
CD04890	Q188T0_PEPD6	Putative phosphoribosylaminoimidazole-succinocarboxamide synthetase OS=Peptoclostridium difficile (strain 630) GN=CD04890 PE=4 SV=1	-	0.000912289	0.00147997	0.000999074	0.00100291		-0.131101		0.00552509
CD23200	Q185J3_PEPD6	Ribose-5-phosphate isomerase B1 (Phosphoriboisomerase B) OS=Peptoclostridium difficile (strain 630) GN=rpiB1 PE=4 SV=1	-	0.000327162	0.000436361	0.000330704	0.000331811		-0.0155388		0.00481951
CD16180	Q186H3_PEPD6	ABC-type transport system, multidrug-family ATP-binding protein OS=Peptoclostridium difficile (strain 630) GN=CD16180 PE=4 SV=1	-	7.10903e-05	0.000116429	8.99517e-05	9.00268e-05		-0.339498		0.00120466
CD05670	Q189B0_PEPD6	Uncharacterised protein, DegV family OS=Peptoclostridium difficile (strain 630) GN=CD05670 PE=4 SV=1	-	0.000130456	0.000105626	0.000114967	0.00011505		0.182346		0.00103532
CD06480	Q189J4_PEPD6	Transcriptional regulator, GntR family OS=Peptoclostridium difficile (strain 630) GN=CD06480 PE=4 SV=1	-	5.44887e-05	3.32766e-05	4.64229e-05	4.64351e-05		0.23112		0.000377725
CD29610	Q184F1_PEPD6	Uncharacterised protein OS=Peptoclostridium difficile (strain 630) GN=CD29610 PE=4 SV=1	-	6.50918e-06		1.13702e-05	1.13594e-05		-0.804714		-0.0013754
CD02110	Q18CV4_PEPD6	CTP:phosphocholine cytidylyltransferase OS=Peptoclostridium difficile (strain 630) GN=licC PE=4 SV=1	-	0.00012032	9.23465e-05	0.000137681	0.000137549		-0.194445		-0.00137758
CD00790	RS3_PEPD6	30S ribosomal protein S3 OS=Peptoclostridium difficile (strain 630) GN=rpsC PE=3 SV=1	-	0.00617637	0.00516562	0.00569318	0.00567682		0.117525		-0.00415113
CD35580	Q181F8_PEPD6	BirA bifunctional protein OS=Peptoclostridium difficile (strain 630) GN=birA PE=4 SV=1	-	4.20151e-05	4.18835e-05	3.28531e-05	3.26938e-05		0.35488		-0.00701317
CD27510	Q183I8_PEPD6	Uncharacterized protein OS=Peptoclostridium difficile (strain 630) GN=CD27510 PE=4 SV=1	-	5.64282e-05	3.86922e-05	5.08187e-05	5.05546e-05		0.151057		-0.00751753
CD12570	RL19_PEPD6	50S ribosomal protein L19 OS=Peptoclostridium difficile (strain 630) GN=rplS PE=3 SV=1	-	0.00606544	0.0050072	0.00476653	0.00474094		0.347675	**	-0.00776656
CD24810	UNG_PEPD6	Uracil-DNA glycosylase OS=Peptoclostridium difficile (strain 630) GN=ung PE=3 SV=1	-	0.000153133	0.000185105	0.000157787	0.00015693		-0.0431991		-0.00785968
CD36180	Q181M0_PEPD6	Uncharacterized protein OS=Peptoclostridium difficile (strain 630) GN=CD36180 PE=4 SV=1	-		3.11546e-05	3.3381e-05	3.31964e-05		OFF		-0.00799717
CD08690	Q18A64_PEPD6	ABC-type transport system, molybdenum-specific extracellular solute-binding protein OS=Peptoclostridium difficile (strain 630) GN=modA PE=1 SV=1	-	0.00010166	9.11123e-05	9.07803e-05	9.02515e-05		0.163294		-0.00842868
CD02100	Q18CU7_PEPD6	Putative hydrolase, HAD superfamily, subfamily IA OS=Peptoclostridium difficile (strain 630) GN=CD02100 PE=4 SV=1	-	2.02938e-05	2.95099e-05	9.66152e-06	9.58958e-06		1.07072		-0.0107827
CD28400	Q183S4_PEPD6	Serine--tRNA ligase OS=Peptoclostridium difficile (strain 630) GN=serS1A PE=3 SV=1	-	0.00053919	0.000445272	0.000539988	0.000535898		-0.00213391		-0.010968
CD02660	Q18D09_PEPD6	RNA polymerase sigma factor OS=Peptoclostridium difficile (strain 630) GN=fliA PE=3 SV=1	-		4.02807e-05	4.96269e-05	4.92123e-05		OFF		-0.0121038
CD11580	Q18B18_PEPD6	Putative radical SAM-superfamily protein OS=Peptoclostridium difficile (strain 630) GN=CD11580 PE=4 SV=1	-	0.00032544	0.000260827	0.000340076	0.000336101		-0.0634662		-0.016963
CD35500	Q181E7_PEPD6	Thymidylate kinase OS=Peptoclostridium difficile (strain 630) GN=tmk PE=3 SV=1	-	0.000109208	6.85652e-05	8.98777e-05	8.87844e-05		0.281037		-0.0176575
CD31630	Q185A3_PEPD6	Uncharacterized protein OS=Peptoclostridium difficile (strain 630) GN=CD31630 PE=4 SV=1	-			1.08375e-05	1.07053e-05		OFF		-0.017711
CD00210	Q18CA4_PEPD6	Pyruvate carboxylase OS=Peptoclostridium difficile (strain 630) GN=pycA PE=4 SV=1	-	0.00682775	0.00424475	0.00688743	0.00679332		-0.012556		-0.0198483
CD15100	Q18C30_PEPD6	Uncharacterized protein OS=Peptoclostridium difficile (strain 630) GN=CD15100 PE=4 SV=1	-	0.000109639	0.00014504	0.000138777	0.000136651		-0.340014		-0.0222763
CD07070	Q189Q1_PEPD6	Putative diguanylate kinase signaling protein OS=Peptoclostridium difficile (strain 630) GN=CD07070 PE=4 SV=2	-	8.69825e-06	1.21347e-05	1.03126e-05	1.015e-05		-0.24561		-0.0229248
CD03400	Q18D80_PEPD6	Uncharacterised protein OS=Peptoclostridium difficile (strain 630) GN=CD03400 PE=4 SV=1	-	7.65324e-05	0.000145875	0.000139252	0.000136995		-0.863551	**	-0.0235665
CD22350	Q185B1_PEPD6	Transcriptional regulator, RpiR family OS=Peptoclostridium difficile (strain 630) GN=CD22350 PE=4 SV=1	-	3.38906e-05	1.59537e-05	2.3195e-05	2.27915e-05		0.54707		-0.0253161
CD20950	Q188G4_PEPD6	Putative cell division GTPase OS=Peptoclostridium difficile (strain 630) GN=CD20950 PE=4 SV=1	-	0.000118305	7.2852e-05	0.000116935	0.000114894		0.0168058		-0.0254082
CD00870	RL18_PEPD6	50S ribosomal protein L18 OS=Peptoclostridium difficile (strain 630) GN=rplR PE=3 SV=1	-	0.00577672	0.0051449	0.00508054	0.0049856		0.185268		-0.0272163
CD00290	Q18CB1_PEPD6	Putative membrane protein OS=Peptoclostridium difficile (strain 630) GN=CD00290 PE=4 SV=1	-	0.000824936	0.00075632	0.000631989	0.000619873		0.384384		-0.0279271
CD02480	Q18CY4_PEPD6	Flagellar M-ring protein OS=Peptoclostridium difficile (strain 630) GN=fliF PE=3 SV=1	-	0.000322431	0.00035974	0.000363535	0.000356533		-0.173103		-0.0280616
CD08870	Q18A76_PEPD6	Transcriptional regulator, GntR family OS=Peptoclostridium difficile (strain 630) GN=CD08870 PE=4 SV=1	-	0.000133772	0.000120925	0.000141224	0.00013847		-0.0782126		-0.0284078
CD01880	Q18CT0_PEPD6	2-dehydropantoate 2-reductase OS=Peptoclostridium difficile (strain 630) GN=CD01880 PE=3 SV=1	-	3.06206e-05	5.01754e-05	2.7336e-05	2.67814e-05		0.163698		-0.0295702
CD02440	Q18CY0_PEPD6	Putative CDP-glycerol:Poly(Glycerophosphate) glycerophosphotransferase OS=Peptoclostridium difficile (strain 630) GN=CD02440 PE=4 SV=1	-	0.000219887	0.000204859	0.000303941	0.000297174		-0.467031		-0.0324854
CD13530	Q18BM1_PEPD6	Putative phosphomethylpyrimidine kinase OS=Peptoclostridium difficile (strain 630) GN=CD13530 PE=4 SV=1	-	0.000283472	0.000543427	0.000388365	0.00037912		-0.454208	**	-0.0347619
CD27460	Q183I1_PEPD6	Single-stranded-DNA-specific exonuclease OS=Peptoclostridium difficile (strain 630) GN=recJ PE=4 SV=1	-	9.28037e-05	2.67749e-05	3.0836e-05	3.0101e-05		1.58957		-0.034802
CD27950	Q183N0_PEPD6	Cell wall binding protein cwp11 OS=Peptoclostridium difficile (strain 630) GN=cwp11 PE=4 SV=1	-	0.00139184	0.00031911	0.000660828	0.000644729		1.07464	**	-0.0355811
CD02510	Q18CY8_PEPD6	ATP synthase subunit beta FliI OS=Peptoclostridium difficile (strain 630) GN=fliI PE=4 SV=1	-	1.92578e-05		1.55111e-05	1.51219e-05		0.31214		-0.0366655
CD03450	Q18D82_PEPD6	Putative GTP pyrophosphokinase OS=Peptoclostridium difficile (strain 630) GN=CD03450 PE=4 SV=1	-	8.9816e-05	6.50936e-05	4.268e-05	4.15821e-05		1.07341	**	-0.0375975
CD02840	Q18D24_PEPD6	PTS system, mannose/fructose/sorbose IIA component OS=Peptoclostridium difficile (strain 630) GN=CD02840 PE=4 SV=1	-	0.00276518	0.001536	0.00150633	0.00146698		0.876335	**	-0.0381919
CD24530	Q182E1_PEPD6	Putative CRISPR-associated negative autoregulator OS=Peptoclostridium difficile (strain 630) GN=CD24530 PE=4 SV=1	-	0.000103757	0.000166718	0.000127144	0.000123811		-0.293263		-0.0383283
CD17920	Q187A2_PEPD6	Putative L-threonine 3-dehydrogenase OS=Peptoclostridium difficile (strain 630) GN=CD17920 PE=4 SV=1	-	0.000153383	0.000245065	0.000195354	0.000190231		-0.348954		-0.0383414
CD25320	Q182L9_PEPD6	Aminotransferase, alanine--glyoxylate transaminase OS=Peptoclostridium difficile (strain 630) GN=CD25320 PE=3 SV=1	-	0.0021597	0.00741843	0.00338912	0.00329967		-0.650076	**	-0.0385909
CD19530	Q187R2_PEPD6	Uncharacterized protein OS=Peptoclostridium difficile (strain 630) GN=CD19530 PE=4 SV=1	-	0.000709759	0.000730878	0.000874753	0.000851245		-0.301547		-0.039302
CD10060	Q18AK7_PEPD6	Putative acyl-CoA N-acyltransferase OS=Peptoclostridium difficile (strain 630) GN=CD10060 PE=4 SV=1	-	6.15147e-05	4.15038e-05	4.18196e-05	4.06444e-05		0.556751	**	-0.0411244
CD26460	Q182X9_PEPD6	Cell division protein FtsZ OS=Peptoclostridium difficile (strain 630) GN=ftsZ PE=3 SV=1	-	0.00119355	0.00167336	0.0011737	0.00113906		0.0241982		-0.0432205
CD25840	FMT_PEPD6	Methionyl-tRNA formyltransferase OS=Peptoclostridium difficile (strain 630) GN=fmt PE=3 SV=1	-	0.000128832	0.000177561	0.000134256	0.000130229		-0.0594882		-0.0439331
CD06730	Q189L5_PEPD6	Putative methyltransferase OS=Peptoclostridium difficile (strain 630) GN=CD06730 PE=4 SV=1	-	6.83292e-05	5.39807e-05	4.83703e-05	4.6876e-05		0.49838		-0.0452713
CD00860	RL6_PEPD6	50S ribosomal protein L6 OS=Peptoclostridium difficile (strain 630) GN=rplF PE=3 SV=1	-	0.00421346	0.00333856	0.00325559	0.00315051		0.372087	**	-0.0473324
CD34220	Q180S2_PEPD6	Sirohydrochlorin cobaltochelatase OS=Peptoclostridium difficile (strain 630) GN=cbiK PE=3 SV=1	-	0.000420208	0.000342748	0.000467396	0.000451345		-0.153541		-0.0504159
CD06890	Q189N2_PEPD6	Putative nucleotide phosphodiesterase OS=Peptoclostridium difficile (strain 630) GN=CD06890 PE=4 SV=1	-	8.60169e-06		1.2686e-05	1.2243e-05		-0.560541		-0.0512744
CD26390	Q182X4_PEPD6	Uncharacterized protein OS=Peptoclostridium difficile (strain 630) GN=CD26390 PE=4 SV=1	-	7.31385e-05	5.99629e-05	7.78774e-05	7.51207e-05		-0.0905752		-0.051995
CD02810	Q18D20_PEPD6	Uncharacterized protein OS=Peptoclostridium difficile (strain 630) GN=CD02810 PE=4 SV=1	-	2.0514e-05	1.55064e-05	1.2857e-05	1.24005e-05		0.674051		-0.0521615
CD20920	Q188F9_PEPD6	Transcriptional regulator, sigma-54-dependent OS=Peptoclostridium difficile (strain 630) GN=CD20920 PE=4 SV=1	-	2.30347e-05	3.93958e-05	2.47201e-05	2.38311e-05		-0.101876		-0.0528363
CD00970	RS4_PEPD6	30S ribosomal protein S4 OS=Peptoclostridium difficile (strain 630) GN=rpsD PE=3 SV=1	-	0.00818808	0.00575336	0.00677232	0.00652484		0.273874		-0.0537084
CD00140	Q18C97_PEPD6	Serine--tRNA ligase OS=Peptoclostridium difficile (strain 630) GN=serS PE=3 SV=1	-	0.0010129	0.000893609	0.00137001	0.00131962		-0.435688		-0.054056
CD26260	Q182V9_PEPD6	UPF0210 protein CD26260 OS=Peptoclostridium difficile (strain 630) GN=CD26260 PE=3 SV=2	-	0.000843903	0.000760168	0.000586143	0.000564483		0.525824		-0.0543238
CD27710	Q183L0_PEPD6	UDP-glucose 6-dehydrogenase OS=Peptoclostridium difficile (strain 630) GN=rkpK PE=3 SV=1	-	0.000129118	8.09872e-05	9.71117e-05	9.35208e-05		0.410968		-0.0543573
CD15260	PYRC_PEPD6	Dihydroorotase OS=Peptoclostridium difficile (strain 630) GN=pyrC PE=3 SV=1	-	0.000113905	0.000113327	0.000128003	0.000123231		-0.16835		-0.0548082
CD07850	Q189Y0_PEPD6	ABC-type transport system, ATP-binding protein OS=Peptoclostridium difficile (strain 630) GN=CD07850 PE=3 SV=1	-	0.000330142	0.000141182	0.000272673	0.000262164		0.275916		-0.0567
CD24120	Q181Z7_PEPD6	Putative transcriptional repressor ccpn OS=Peptoclostridium difficile (strain 630) GN=CD24120 PE=4 SV=1	-	0.000127451	0.000164841	0.000168404	0.000161693		-0.401985		-0.0586712
CD11820	Q18B45_PEPD6	3-oxoacyl-[acyl-carrier protein] reductase (3-ketoacyl-acyl carrier protein reductase) OS=Peptoclostridium difficile (strain 630) GN=fabG PE=3 SV=1	-	0.00137776	0.00152022	0.0011741	0.00112688		0.230767	**	-0.0592231
CD00070	Q18C91_PEPD6	Putative spore protein OS=Peptoclostridium difficile (strain 630) GN=CD00070 PE=4 SV=1	-	5.74409e-05	6.54759e-05	7.70099e-05	7.38542e-05		-0.422965		-0.0603645
CD02250	Q18CW3_PEPD6	Phosphoribosylformylglycinamidine synthase OS=Peptoclostridium difficile (strain 630) GN=purL PE=4 SV=1	-	0.0011022	0.00140048	0.00096699	0.00092707		0.188818		-0.0608229
CD10240	POTA_PEPD6	Spermidine/putrescine import ATP-binding protein PotA OS=Peptoclostridium difficile (strain 630) GN=potA PE=3 SV=1	-	0.00018204	0.000173371	0.000135001	0.000129422		0.431286		-0.0608884
CD22640	Q185D8_PEPD6	Uncharacterized protein OS=Peptoclostridium difficile (strain 630) GN=CD22640 PE=4 SV=1	-	6.58641e-05	4.19607e-05	6.28552e-05	6.01726e-05		0.0674597		-0.062926
CD29640	Q184F3_PEPD6	Putative tRNA-binding protein OS=Peptoclostridium difficile (strain 630) GN=CD29640 PE=4 SV=1	-	8.49091e-05	7.37484e-05	9.39132e-05	8.98952e-05		-0.145409		-0.0630847
CD27760	Q183L3_PEPD6	Putative glycosyl transferase, family 2 OS=Peptoclostridium difficile (strain 630) GN=CD27760 PE=4 SV=1	-	5.37195e-05	5.18034e-05	4.79123e-05	4.58363e-05		0.165049		-0.063906
CD16460	Q186K2_PEPD6	Putative peptidase, M19 family OS=Peptoclostridium difficile (strain 630) GN=CD16460 PE=4 SV=1	-	7.71425e-05	9.62853e-05	3.37345e-05	3.22725e-05		1.1933		-0.0639177
CD12150	Q18B79_PEPD6	Putative thiamine diphosphokinase OS=Peptoclostridium difficile (strain 630) GN=CD12150 PE=4 SV=1	-	0.000107052	9.72367e-05	7.5397e-05	7.1887e-05		0.505739		-0.0687756
CD14550	Q18BX5_PEPD6	RNA polymerase sigma factor SigA OS=Peptoclostridium difficile (strain 630) GN=sigA1 PE=3 SV=1	-	0.000156209	8.23155e-05	0.00010684	0.000101771		0.548021		-0.070131
CD27240	Q183F9_PEPD6	Putative polysaccharide deacetylase OS=Peptoclostridium difficile (strain 630) GN=CD27240 PE=4 SV=1	-	5.54201e-05	2.37322e-05	2.81277e-05	2.67815e-05		0.97842		-0.0707525
CD08730	Q18A65_PEPD6	ABC-type transport system, sugar-family extracellular solute-binding protein OS=Peptoclostridium difficile (strain 630) GN=CD08730 PE=4 SV=1	-	0.0052338	0.00907315	0.00911506	0.00866602		-0.800392	**	-0.072883
CD26960	Q183D0_PEPD6	Putative pyridoxal phosphate-dependent transferase OS=Peptoclostridium difficile (strain 630) GN=CD26960 PE=4 SV=1	-	2.48853e-05	5.67814e-05	2.87162e-05	2.72978e-05		-0.206569		-0.0730783
CD13170	Q18BH9_PEPD6	Uncharacterised protein DegV family OS=Peptoclostridium difficile (strain 630) GN=CD13170 PE=4 SV=1	-	7.35502e-05	2.2386e-05	2.7384e-05	2.60225e-05		1.4254	**	-0.0735767
CD20170	Q187Y4_PEPD6	Transcriptional regulator, HTH-type OS=Peptoclostridium difficile (strain 630) GN=CD20170 PE=4 SV=1	-	1.85637e-05		1.87977e-05	1.78597e-05		-0.0180741		-0.0738522
CD19380	Q187P8_PEPD6	Acetyl-CoA carboxylase subunit OS=Peptoclostridium difficile (strain 630) GN=accC PE=4 SV=1	-	0.000698629	0.000382221	0.000458028	0.000434942		0.609091	**	-0.074613
CD18380	Q187E9_PEPD6	Shikimate kinase OS=Peptoclostridium difficile (strain 630) GN=aroK PE=3 SV=1	-	0.000132758	8.29755e-05	0.000101125	9.60269e-05		0.392663	**	-0.0746262
CD12820	SYA_PEPD6	Alanine--tRNA ligase OS=Peptoclostridium difficile (strain 630) GN=alaS PE=3 SV=1	-	0.00150974	0.00115093	0.00170252	0.00161615		-0.173368		-0.0751071
CD02230	PUR9_PEPD6	Bifunctional purine biosynthesis protein PurH OS=Peptoclostridium difficile (strain 630) GN=purH PE=3 SV=1	-	0.00102462	0.00133261	0.000869591	0.000824441		0.236684		-0.0769193
CD02890	Q18D26_PEPD6	PTS system, mannose/fructose/sorbose IID component OS=Peptoclostridium difficile (strain 630) GN=CD02890 PE=4 SV=1	-	0.00423133	0.00365139	0.00307835	0.00291563		0.458953		-0.0783519
CD23360	Q185L1_PEPD6	Putative toxic anion resistance protein OS=Peptoclostridium difficile (strain 630) GN=CD23360 PE=4 SV=1	-	6.05252e-05	5.39799e-05	7.37665e-05	6.97738e-05		-0.285428		-0.08028
CD00780	RL22_PEPD6	50S ribosomal protein L22 OS=Peptoclostridium difficile (strain 630) GN=rplV PE=3 SV=1	-	0.00458418	0.00347704	0.00297843	0.00281573		0.62211	**	-0.0810429
CD24360	Q182C2_PEPD6	Putative divalent cation transporter, MgtE family OS=Peptoclostridium difficile (strain 630) GN=CD24360 PE=4 SV=1	-	6.20164e-05	2.80886e-05	4.51201e-05	4.26532e-05		0.45888		-0.0811149
CD00881	RL30_PEPD6	50S ribosomal protein L30 OS=Peptoclostridium difficile (strain 630) GN=rpmD PE=3 SV=1	-	0.00152708	0.00121462	0.00148564	0.00140439		0.0396859		-0.0811426
CD14350	Q18BV3_PEPD6	Uncharacterized protein OS=Peptoclostridium difficile (strain 630) GN=CD14350 PE=4 SV=1	-	1.72254e-05	2.79201e-05	1.48645e-05	1.4032e-05		0.212663		-0.0831541
CD12070	DXS_PEPD6	1-deoxy-D-xylulose-5-phosphate synthase OS=Peptoclostridium difficile (strain 630) GN=dxs PE=3 SV=1	-	4.52638e-05	4.2692e-05	6.55276e-05	6.18568e-05		-0.533746		-0.083171
CD19860	MIAB_PEPD6	tRNA-2-methylthio-N(6)-dimethylallyladenosine synthase OS=Peptoclostridium difficile (strain 630) GN=miaB PE=3 SV=1	-	0.000244773	9.66494e-05	0.000200223	0.000188844		0.289837		-0.0844118
CD25570	Q182P6_PEPD6	Uncharacterized protein OS=Peptoclostridium difficile (strain 630) GN=CD25570 PE=4 SV=1	-	3.74715e-05	4.56716e-05	3.42959e-05	3.2346e-05		0.127754		-0.0844508
CD20610	Q188D0_PEPD6	Uncharacterized protein OS=Peptoclostridium difficile (strain 630) GN=CD20610 PE=4 SV=1	-	0.00019371	0.000254358	0.000228569	0.000215308		-0.238732		-0.0862318
CD07110	SYR_PEPD6	Arginine--tRNA ligase OS=Peptoclostridium difficile (strain 630) GN=argS PE=3 SV=1	-	0.00078615	0.000551453	0.000724458	0.000681359		0.117903		-0.0884862
CD00910	KAD_PEPD6	Adenylate kinase OS=Peptoclostridium difficile (strain 630) GN=adk PE=3 SV=1	-	0.00192577	0.00132851	0.00128312	0.00120499		0.585777		-0.0906423
CD33080	Q180F2_PEPD6	Ribonuclease PH OS=Peptoclostridium difficile (strain 630) GN=rph PE=3 SV=1	-	8.12642e-05	6.43583e-05	8.3242e-05	7.81206e-05		-0.0346906		-0.0916078
CD11750	ACKA_PEPD6	Acetate kinase OS=Peptoclostridium difficile (strain 630) GN=ackA PE=3 SV=1	-	0.00317178	0.00346723	0.00262835	0.00246638		0.271135		-0.0917627
CD00700	EFG_PEPD6	Elongation factor G OS=Peptoclostridium difficile (strain 630) GN=fusA PE=3 SV=1	-	0.0116524	0.00764394	0.00971189	0.00910685		0.262808		-0.0928002
CD36550	PURA_PEPD6	Adenylosuccinate synthetase OS=Peptoclostridium difficile (strain 630) GN=purA PE=3 SV=1	-	0.000649677	0.000679887	0.000462739	0.000433306		0.489524	**	-0.094811
CD08980	Y898_PEPD6	UPF0371 protein CD08980 OS=Peptoclostridium difficile (strain 630) GN=CD08980 PE=3 SV=1	-	0.000116338	8.79695e-05	0.000123902	0.000115939		-0.0908802		-0.0958374
CD00730	RL3_PEPD6	50S ribosomal protein L3 OS=Peptoclostridium difficile (strain 630) GN=rplC PE=3 SV=1	-	0.00785603	0.00624775	0.00652938	0.00610176		0.266856		-0.0977195
CD35140	Q181B3_PEPD6	Ribose-phosphate pyrophosphokinase OS=Peptoclostridium difficile (strain 630) GN=prs PE=3 SV=1	-	0.00174983	0.00196363	0.00142092	0.00132785		0.300391		-0.0977308
CD11290	Q18AZ0_PEPD6	Dephospho-CoA kinase OS=Peptoclostridium difficile (strain 630) GN=coaE PE=3 SV=1	-	1.68059e-05	8.06798e-06	1.06552e-05	9.95281e-06		0.657413	**	-0.0983819
CD20480	Q188B6_PEPD6	Transcriptional regulator, RpiR family OS=Peptoclostridium difficile (strain 630) GN=CD20480 PE=4 SV=1	-	0.000129997	8.24104e-05	0.000114908	0.000107325		0.178009		-0.0984861
CD25230	Q182K9_PEPD6	Putative hydrolase OS=Peptoclostridium difficile (strain 630) GN=CD25230 PE=4 SV=1	-	4.04359e-05	0.000115949	8.70276e-05	8.12788e-05		-1.10584	**	-0.0985945
CD25590	Q182P7_PEPD6	Rna methyltransferase, rsmd family OS=Peptoclostridium difficile (strain 630) GN=CD25590 PE=4 SV=1	-	2.17925e-05	8.07728e-05	1.16643e-05	1.08887e-05		0.901737		-0.0992638
CD00880	RS5_PEPD6	30S ribosomal protein S5 OS=Peptoclostridium difficile (strain 630) GN=rpsE PE=3 SV=1	-	0.00561268	0.00369165	0.00411977	0.00384039		0.446127	**	-0.101309
CD27780	Q183L1_PEPD6	Putative glycosyl transferase OS=Peptoclostridium difficile (strain 630) GN=CD27780 PE=4 SV=1	-	0.000120303	9.54799e-05	0.000112099	0.000104367		0.1019		-0.103112
CD00960	RS11_PEPD6	30S ribosomal protein S11 OS=Peptoclostridium difficile (strain 630) GN=rpsK PE=3 SV=1	-	0.00323102	0.00286053	0.0030164	0.00280699		0.0991593		-0.103802
CD07840	Q189Y1_PEPD6	Putative N-acetylmuramoyl-L-alanine amidase OS=Peptoclostridium difficile (strain 630) GN=CD07840 PE=4 SV=1	-	1.47942e-05	1.35925e-05	1.49031e-05	1.3854e-05		-0.0105797		-0.105309
CD35460	Q181E6_PEPD6	Ribosomal RNA small subunit methyltransferase I OS=Peptoclostridium difficile (strain 630) GN=rsmI PE=3 SV=1	-	3.10799e-05	2.35325e-05	3.15524e-05	2.92789e-05		-0.0217672		-0.107891
CD18260	Q187D6_PEPD6	Homoserine O-succinyltransferase OS=Peptoclostridium difficile (strain 630) GN=metA PE=4 SV=1	-	1.11383e-05		1.94376e-05	1.8036e-05		-0.803318		-0.107971
CD11490	MINC_PEPD6	Probable septum site-determining protein MinC OS=Peptoclostridium difficile (strain 630) GN=minC PE=3 SV=1	-	1.50148e-05	1.3582e-05	3.1643e-05	2.93561e-05		-1.07551	**	-0.108229
CD12100	Q18B71_PEPD6	Uncharacterized protein OS=Peptoclostridium difficile (strain 630) GN=CD12100 PE=4 SV=1	-	2.73704e-06		2.74455e-06	2.54546e-06		-0.00395328		-0.108641
CD09570	Q183Z1_PEPD6	Putative phage lipoprotein OS=Peptoclostridium difficile (strain 630) GN=CD09570 PE=4 SV=1	-	9.76857e-06	1.66287e-05	1.38988e-05	1.28885e-05		-0.508737		-0.108868
CD05190	Q188W4_PEPD6	Uncharacterized protein OS=Peptoclostridium difficile (strain 630) GN=CD05190 PE=4 SV=1	-	0.00140006	0.00172695	0.00111063	0.00102628		0.334101		-0.113953
CD24550	Q182E2_PEPD6	Putative CRISPR-associated protein OS=Peptoclostridium difficile (strain 630) GN=CD24550 PE=4 SV=1	-	1.40196e-05	1.46517e-05	1.54658e-05	1.42835e-05		-0.141637		-0.114728
CD20500	Q188B7_PEPD6	Pseudouridine synthase OS=Peptoclostridium difficile (strain 630) GN=rluB PE=3 SV=1	-	2.36135e-05	1.40896e-05	2.7956e-05	2.58166e-05		-0.243543		-0.114856
CD33970	WHIA_PEPD6	Putative sporulation transcription regulator WhiA OS=Peptoclostridium difficile (strain 630) GN=whiA PE=3 SV=2	-	3.60845e-05	2.8651e-05	3.67684e-05	3.3939e-05		-0.0270882		-0.115521
CD11200	Q18AX8_PEPD6	Formate acetyltransferase (Pyruvate formate-lyase) OS=Peptoclostridium difficile (strain 630) GN=pflD PE=4 SV=1	-	7.76788e-05	4.90951e-05	2.39442e-05	2.20708e-05		1.69784		-0.117539
CD00950	RS13_PEPD6	30S ribosomal protein S13 OS=Peptoclostridium difficile (strain 630) GN=rpsM PE=3 SV=1	-	0.00607017	0.00506534	0.00512118	0.00471956		0.245259		-0.117823
CD25260	Q182L3_PEPD6	1,4-alpha-glucan branching enzyme OS=Peptoclostridium difficile (strain 630) GN=glgB PE=4 SV=1	-	2.78079e-05	9.65314e-06	2.75283e-05	2.53489e-05		0.0145823		-0.118989
CD34040	Q180Q2_PEPD6	Cardiolipin synthetase (Cardiolipin synthase) (CL synthase) OS=Peptoclostridium difficile (strain 630) GN=cls1 PE=3 SV=1	-	2.5374e-05	1.0233e-05	1.68723e-05	1.54934e-05		0.588692		-0.123011
CD25720	Q182R2_PEPD6	Putative nitroreductase OS=Peptoclostridium difficile (strain 630) GN=CD25720 PE=1 SV=1	-	9.97296e-05	0.00012572	0.00012588	0.000115571		-0.335952	**	-0.123262
CD07180	FTHS_PEPD6	Formate--tetrahydrofolate ligase OS=Peptoclostridium difficile (strain 630) GN=fhs PE=3 SV=1	-	0.000688995	0.000714265	0.000854652	0.00078429		-0.310845		-0.12395
CD36730	Q181S5_PEPD6	Putative stage 0 sporulation protein,DNA-binding protein Spo0J-like OS=Peptoclostridium difficile (strain 630) GN=CD36730 PE=4 SV=1	-	6.28516e-05	5.704e-05	7.33501e-05	6.72841e-05		-0.222848		-0.124532
CD28010	Q183N6_PEPD6	Preprotein translocase, yajc subunit OS=Peptoclostridium difficile (strain 630) GN=CD28010 PE=4 SV=1	-	0.00148543	0.00109776	0.000863789	0.000792296		0.782133	**	-0.12464
CD10020	Q18AK3_PEPD6	Cys-tRNA(Pro)/Cys-tRNA(Cys) deacylase OS=Peptoclostridium difficile (strain 630) GN=CD10020 PE=3 SV=1	-	3.9752e-05	2.34933e-05	4.85401e-05	4.44713e-05		-0.28815		-0.126302
CD34260	Q180S3_PEPD6	Cobalt-precorrin-4 C(11)-methyltransferase (Cobalt-precorrin-3 methylase) OS=Peptoclostridium difficile (strain 630) GN=cbiF PE=1 SV=1	-	0.000123153	0.000130858	0.000174481	0.000159624		-0.502622		-0.128396
CD19370	ACCD_PEPD6	Acetyl-coenzyme A carboxylase carboxyl transferase subunit beta OS=Peptoclostridium difficile (strain 630) GN=accD PE=3 SV=1	-	0.000486966	0.000288297	0.000367703	0.000336357		0.405281		-0.128546
CD35620	Q181G1_PEPD6	Glutamate racemase OS=Peptoclostridium difficile (strain 630) GN=murI PE=3 SV=1	-	0.000167438	7.92084e-05	9.52969e-05	8.70765e-05		0.813124	**	-0.130146
CD32530	Q17ZZ4_PEPD6	Folylpolyglutamate synthase OS=Peptoclostridium difficile (strain 630) GN=folC PE=3 SV=1	-	6.68365e-05	7.15721e-05	5.26261e-05	4.8025e-05		0.344858		-0.131994
CD16360	Q186J0_PEPD6	Tellurium resistance protein terD2 OS=Peptoclostridium difficile (strain 630) GN=terD2 PE=4 SV=1	-	0.000863176	0.000622551	0.000849021	0.000772356		0.0238549		-0.136534
CD23830	Q181W8_PEPD6	Transcriptional regulator, sigma-54-dependent OS=Peptoclostridium difficile (strain 630) GN=CD23830 PE=4 SV=2	-	1.22143e-05	1.41878e-05	1.58516e-05	1.44077e-05		-0.376054		-0.137789
CD13180	PNP_PEPD6	Polyribonucleotide nucleotidyltransferase OS=Peptoclostridium difficile (strain 630) GN=pnp PE=3 SV=1	-	0.00140167	0.00101205	0.00101504	0.000920558		0.465608		-0.140959
CD00760	RL2_PEPD6	50S ribosomal protein L2 OS=Peptoclostridium difficile (strain 630) GN=rplB PE=3 SV=1	-	0.00459572	0.00411262	0.00418032	0.00378889		0.136679		-0.141837
CD00390	Q18CC1_PEPD6	Acetoin dehydrogenase E3 component (Dihydrolipoamide dehydrogenase) OS=Peptoclostridium difficile (strain 630) GN=acoL PE=4 SV=1	-	2.79835e-05	2.22941e-05	3.97064e-05	3.59672e-05		-0.504793	**	-0.142689
CD02880	Q18D27_PEPD6	PTS system, mannose/fructose/sorbose IIC component OS=Peptoclostridium difficile (strain 630) GN=CD02880 PE=4 SV=1	-	0.00151029	0.000903125	0.00144871	0.00131092		0.0600541		-0.144187
CD34490	Q180U7_PEPD6	Putative phosphosugar isomerase putative tagatose-6-phosphate ketose/aldose isomerase AgaS OS=Peptoclostridium difficile (strain 630) GN=CD34490 PE=4 SV=2	-	8.20274e-05	5.6642e-05	3.49003e-05	3.15632e-05		1.23286	**	-0.144996
CD22490	Q185C3_PEPD6	Putative ATPase OS=Peptoclostridium difficile (strain 630) GN=CD22490 PE=4 SV=1	-	4.19965e-05	6.91277e-05	6.95589e-05	6.28975e-05		-0.727965	**	-0.145233
CD05390	Q188Y5_PEPD6	Chemotaxis protein CheA OS=Peptoclostridium difficile (strain 630) GN=cheA PE=4 SV=1	-			1.00184e-05	9.05761e-06		OFF		-0.145446
CD12520	Q18BB4_PEPD6	Signal recognition particle protein OS=Peptoclostridium difficile (strain 630) GN=ffh PE=3 SV=1	-	0.000244145	0.000141536	0.000198752	0.000179521		0.296767		-0.14682
CD08270	Q18A22_PEPD6	Rubredoxin oxidoreductase (Desulfoferrodoxin) OS=Peptoclostridium difficile (strain 630) GN=rbo PE=4 SV=1	-	0.0151707	0.0221496	0.0212825	0.0191915		-0.488382	**	-0.149202
CD36010	Q181K3_PEPD6	D-alanyl-D-alanine carboxypeptidase, M15 family (DD-peptidase) (DD-carboxypeptidase) OS=Peptoclostridium difficile (strain 630) GN=CD36010 PE=4 SV=1	-	1.15635e-05	2.18675e-06	7.84734e-06	7.07246e-06		0.559297		-0.149992
CD32500	Q17ZZ7_PEPD6	Uncharacterized protein OS=Peptoclostridium difficile (strain 630) GN=CD32500 PE=4 SV=2	-	9.39305e-05	9.62744e-05	7.45008e-05	6.70378e-05		0.334336		-0.152281
CD12530	RS16_PEPD6	30S ribosomal protein S16 OS=Peptoclostridium difficile (strain 630) GN=rpsP PE=3 SV=1	-	0.00124693	0.000833008	0.00106394	0.00095466		0.228964		-0.156357
CD21380	PYRH_PEPD6	Uridylate kinase OS=Peptoclostridium difficile (strain 630) GN=pyrH PE=3 SV=1	-	0.000701012	0.000533869	0.000680565	0.000610023		0.0427061		-0.157871
CD11800	Q18B39_PEPD6	Enoyl-(Acyl-carrier-protein) reductase II OS=Peptoclostridium difficile (strain 630) GN=fabK PE=4 SV=1	-	0.00194783	0.0013246	0.0013756	0.00123256		0.501804		-0.158408
CD21060	Q188H5_PEPD6	Putative ATP-dependent RNA helicase OS=Peptoclostridium difficile (strain 630) GN=CD21060 PE=4 SV=1	-	0.0001111	0.000120393	9.77526e-05	8.75625e-05		0.184655		-0.158821
CD02570	Q18CZ1_PEPD6	Flagellar motor rotation protein MotB (Chemotaxis protein MotB) OS=Peptoclostridium difficile (strain 630) GN=motB PE=4 SV=1	-	2.82676e-05	1.78683e-05	4.90406e-05	4.39165e-05		-0.794829	**	-0.159215
CD15410	Q18C61_PEPD6	Putative drug/sodium antiporter, MATE family OS=Peptoclostridium difficile (strain 630) GN=CD15410 PE=4 SV=1	-	3.64532e-05	4.41944e-05	2.89258e-05	2.58904e-05		0.333688		-0.159942
CD20850	Q188F2_PEPD6	Diaminopropionate ammonia-lyase OS=Peptoclostridium difficile (strain 630) GN=dpaL PE=4 SV=1	-	2.69451e-05	1.37744e-05	2.54318e-05	2.27584e-05		0.0833874		-0.160235
CD12840	Q18BE5_PEPD6	Putative membrane protein OS=Peptoclostridium difficile (strain 630) GN=CD12840 PE=4 SV=1	-	7.86485e-05	5.06133e-05	8.70743e-05	7.78054e-05		-0.146828		-0.162377
CD21580	Q185U6_PEPD6	4-aminobutyrate aminotransferase OS=Peptoclostridium difficile (strain 630) GN=gabT PE=3 SV=1	-	0.000300993	0.000415983	0.000252902	0.000225925		0.251153		-0.162732
CD02820	Q18D19_PEPD6	Putative PHP hydrolase OS=Peptoclostridium difficile (strain 630) GN=CD02820 PE=4 SV=1	-	0.000889007	0.000262333	0.000473315	0.000422621		0.909396	**	-0.163436
CD15470	Q18C68_PEPD6	ATP phosphoribosyltransferase regulatory subunit OS=Peptoclostridium difficile (strain 630) GN=hisZ PE=4 SV=1	-	2.25639e-05	1.08486e-05	2.92547e-05	2.61084e-05		-0.374654		-0.164159
CD16840	Q186P0_PEPD6	Putative radical SAM superfamily protein OS=Peptoclostridium difficile (strain 630) GN=CD16840 PE=4 SV=1	-	0.000620497	0.000323003	0.000424804	0.000378897		0.546627		-0.164992
CD22610	Q185D0_PEPD6	Putative peptidase, M24 family OS=Peptoclostridium difficile (strain 630) GN=CD22610 PE=4 SV=1	-	0.00160118	0.00112316	0.00173256	0.00154471		-0.113769		-0.165577
CD26720	Q183A6_PEPD6	ABC-type transport system, oligopeptide-family solute-binding protein OS=Peptoclostridium difficile (strain 630) GN=appA PE=4 SV=1	-	2.99534e-05	2.42867e-05	2.70837e-05	2.41148e-05		0.145294		-0.167508
CD21360	Q185S4_PEPD6	Isoprenyl transferase OS=Peptoclostridium difficile (strain 630) GN=uppS PE=3 SV=1	-	0.00015954	0.000115692	0.000107846	9.59851e-05		0.564953		-0.168085
CD11650	Q18B26_PEPD6	Rna-binding protein, yhby family OS=Peptoclostridium difficile (strain 630) GN=CD11650 PE=4 SV=1	-	0.000307181	0.000186235	0.000197861	0.000175839		0.634601	**	-0.170232
CD06860	RL35_PEPD6	50S ribosomal protein L35 OS=Peptoclostridium difficile (strain 630) GN=rpmI PE=3 SV=1	-	0.000463355	0.000429208	0.00050807	0.000451513		-0.132911		-0.17026
CD20690	Q188D6_PEPD6	Putative molybdopterin cofactor biosynthesis protein OS=Peptoclostridium difficile (strain 630) GN=CD20690 PE=4 SV=1	-	9.66643e-05	0.000151457	9.97867e-05	8.84394e-05		-0.0458653		-0.174159
CD24790	Q182G6_PEPD6	Putative molybdenum cofactor biosynthesis OS=Peptoclostridium difficile (strain 630) GN=CD24790 PE=4 SV=1	-	5.34556e-05	2.28228e-05	4.20089e-05	3.72138e-05		0.347646		-0.174855
CD24440	Q182C9_PEPD6	Putative ribosome-associated sigma 54 modulation protein OS=Peptoclostridium difficile (strain 630) GN=CD24440 PE=4 SV=1	-	0.000719819	0.000802725	0.0009451	0.000837147		-0.392834		-0.174987
CD13860	Q18BQ8_PEPD6	Putative allophanate hydrolase subunit 1 OS=Peptoclostridium difficile (strain 630) GN=CD13860 PE=4 SV=1	-	4.54587e-05	2.01818e-05	2.53343e-05	2.24372e-05		0.843464		-0.175202
CD03270	Q18D67_PEPD6	ABC-type transport system, cobalt-specific ATP-binding protein OS=Peptoclostridium difficile (strain 630) GN=cbiO PE=3 SV=1	-	4.64083e-05	5.02656e-05	4.95871e-05	4.38648e-05		-0.0955816		-0.1769
CD14910	Q18C11_PEPD6	ABC-type transport system, methionine-specific substrate-binding lipoprotein OS=Peptoclostridium difficile (strain 630) GN=metQ PE=4 SV=1	-	0.000260752	0.000194897	0.000257319	0.000227588		0.0191195		-0.177132
CD11810	Q18B46_PEPD6	Malonyl CoA-acyl carrier protein transacylase OS=Peptoclostridium difficile (strain 630) GN=fabD PE=3 SV=1	-	0.00068833	0.000469864	0.000519604	0.000459092		0.405688		-0.17863
CD13080	Q18BH0_PEPD6	Ribosomal protein L7Ae/L30e/S12e/Gadd45 OS=Peptoclostridium difficile (strain 630) GN=CD13080 PE=4 SV=1	-	6.31491e-05	4.06009e-05	3.09074e-05	2.73056e-05		1.03081	**	-0.178756
CD27660	Q183K3_PEPD6	Transcriptional regulator, LytR family OS=Peptoclostridium difficile (strain 630) GN=CD27660 PE=4 SV=1	-	2.66631e-05	9.0975e-06	1.46238e-05	1.29055e-05		0.866524		-0.180328
CD19690	Q187S8_PEPD6	Putative oligonucleotide binding regulator OS=Peptoclostridium difficile (strain 630) GN=CD19690 PE=4 SV=1	-	1.78849e-05	2.74878e-05	3.80783e-05	3.35841e-05		-1.09023		-0.181191
CD13110	W8W0T8_PEPD6	Putative rna-binding protein OS=Peptoclostridium difficile (strain 630) GN=CD13110 PE=4 SV=1	-	6.02089e-05	4.73864e-05	4.91255e-05	4.32761e-05		0.293503		-0.182901
CD00160	Q18C99_PEPD6	DNA polymerase III subunits gamma and tau OS=Peptoclostridium difficile (strain 630) GN=dnaX PE=4 SV=1	-	8.57773e-05	3.7066e-05	7.37641e-05	6.489e-05		0.217677		-0.184923
CD01520	TSAD_PEPD6	tRNA N6-adenosine threonylcarbamoyltransferase OS=Peptoclostridium difficile (strain 630) GN=tsaD PE=3 SV=1	-	4.14867e-05	6.03549e-05	5.40806e-05	4.74678e-05		-0.382461		-0.188161
CD03180	Q18D56_PEPD6	ABC-type transport system,bacitracin/multidrug-family ATP-binding protein OS=Peptoclostridium difficile (strain 630) GN=CD03180 PE=3 SV=1	-	1.9985e-05	3.05563e-05	1.46216e-05	1.28209e-05		0.45081		-0.18961
CD08330	Q18A28_PEPD6	Aconitate hydratase (Citrate hydro-lyase) OS=Peptoclostridium difficile (strain 630) GN=acnB PE=4 SV=1	-	0.000110671	4.92825e-05	0.000119223	0.00010447		-0.107385		-0.190576
CD02400	Q18CX6_PEPD6	Glycosyltransferase OS=Peptoclostridium difficile (strain 630) GN=CD02400 PE=4 SV=1	-	0.000445984	0.000304435	0.0006119	0.000535575		-0.456302		-0.192206
CD01770	Q18CS1_PEPD6	Cyclopropane-fatty-acyl-phospholipid synthase OS=Peptoclostridium difficile (strain 630) GN=cfa PE=4 SV=1	-	0.000498194	0.000728254	0.000563799	0.000493332		-0.178472		-0.192622
CD35810	Q181I3_PEPD6	Uncharacterized protein OS=Peptoclostridium difficile (strain 630) GN=CD35810 PE=4 SV=1	-	0.000168605	8.37766e-05	0.000132348	0.000115587		0.349306		-0.195365
CD07000	Q189P6_PEPD6	Phenylalanine--tRNA ligase beta subunit OS=Peptoclostridium difficile (strain 630) GN=pheT PE=3 SV=1	-	0.000898203	0.000674512	0.00118721	0.0010367		-0.402459		-0.195573
CD13970	Q18BS0_PEPD6	Uncharacterized protein OS=Peptoclostridium difficile (strain 630) GN=CD13970 PE=4 SV=1	-			1.51021e-05	1.31811e-05		OFF		-0.196278
CD15610	Q18C81_PEPD6	Putative xanthine dehydrogenase accessory factor OS=Peptoclostridium difficile (strain 630) GN=CD15610 PE=4 SV=1	-	3.95936e-05	2.83621e-05	2.544e-05	2.21987e-05		0.638169		-0.196625
CD26620	Q182Z7_PEPD6	Ribosome-binding ATPase YchF OS=Peptoclostridium difficile (strain 630) GN=ychF PE=3 SV=1	-	0.000601471	0.000365001	0.000447419	0.000390224		0.426868		-0.197324
CD35930	Q181J4_PEPD6	Uncharacterized protein OS=Peptoclostridium difficile (strain 630) GN=CD35930 PE=4 SV=1	-	0.000116828	8.80492e-05	0.000127282	0.000110712		-0.123642		-0.201207
CD25600	Q182P8_PEPD6	ATP-dependent DNA helicase RecG OS=Peptoclostridium difficile (strain 630) GN=recG PE=4 SV=2	-	9.62456e-06	5.6999e-05	6.7469e-06	5.85651e-06		0.512495		-0.204183
CD01010	ECFA2_PEPD6	Energy-coupling factor transporter ATP-binding protein EcfA2 OS=Peptoclostridium difficile (strain 630) GN=ec	-	0.000140619	0.000106332	9.5565e-05	8.29329e-05		0.557237		-0.204538
CD24380	Q182C5_PEPD6	Cytidine deaminase (Cytidine aminohydrolase) (CDA) OS=Peptoclostridium difficile (strain 630) GN=cdd PE=4 SV=1	-	4.80705e-05	3.16129e-05	3.38204e-05	2.9349e-05		0.507257		-0.204585
CD15420	Q18C64_PEPD6	Fic family protein OS=Peptoclostridium difficile (strain 630) GN=CD15420 PE=4 SV=1	-	0.000204717	0.00026939	0.000171227	0.000148132		0.257718		-0.20903
CD14320	Q18BV0_PEPD6	Putative ribonuclease OS=Peptoclostridium difficile (strain 630) GN=CD14320 PE=4 SV=2	-	1.36713e-05	3.22295e-05	3.18096e-05	2.74987e-05		-1.21831		-0.210096
CD02190	Q18CV5_PEPD6	Phosphoribosylaminoimidazole-succinocarboxamide synthase OS=Peptoclostridium difficile (strain 630) GN=purC PE=3 SV=1	-	0.000930281	0.000986423	0.000698892	0.000603796		0.412598	**	-0.211009
CD19360	Q187P7_PEPD6	Acetyl-coenzyme A carboxylase carboxyl transferase subunit alpha OS=Peptoclostridium difficile (strain 630) GN=accA PE=3 SV=1	-	0.000313944	0.000791139	0.00030094	0.000259258		0.0610316		-0.215088
CD20650	Q188D5_PEPD6	Transcriptional regulator, beta-lactams repressor OS=Peptoclostridium difficile (strain 630) GN=CD20650 PE=4 SV=1	-	7.81446e-05	0.000130153	1.39507e-05	1.20105e-05		2.48581		-0.216034
CD36530	Q181Q4_PEPD6	DNA replication protein DnaD/DnaB OS=Peptoclostridium difficile (strain 630) GN=dnaD PE=4 SV=1	-	2.40651e-05	3.14012e-05	2.22452e-05	1.91351e-05		0.11345		-0.217269
CD28410	Q183S9_PEPD6	Putative amidohydrolase OS=Peptoclostridium difficile (strain 630) GN=CD28410 PE=4 SV=1	-	9.14079e-05	9.21889e-05	0.000161884	0.000139228		-0.824565	**	-0.217508
CD22750	Q185E5_PEPD6	DNA topoisomerase 3 OS=Peptoclostridium difficile (strain 630) GN=topB2 PE=3 SV=1	-	0.000110033	5.9662e-05	0.000100695	8.64409e-05		0.127944		-0.220206
CD14500	Q18BX0_PEPD6	Dihydropteroate synthase OS=Peptoclostridium difficile (strain 630) GN=folP PE=3 SV=1	-	9.01618e-05	8.21635e-05	6.99467e-05	6.00219e-05		0.366259		-0.220768	**
CD35470	Q181E5_PEPD6	Putative methyltransferase OS=Peptoclostridium difficile (strain 630) GN=CD35470 PE=4 SV=1	-	4.3346e-05	3.20336e-05	3.55493e-05	3.04831e-05		0.28608		-0.22181
CD07560	Q189V2_PEPD6	Putative nitroreductase OS=Peptoclostridium difficile (strain 630) GN=CD07560 PE=4 SV=1	-	5.96581e-05	7.25145e-05	7.38943e-05	6.33106e-05		-0.308745		-0.223015
CD16420	Q186J5_PEPD6	Uncharacterized protein OS=Peptoclostridium difficile (strain 630) GN=CD16420 PE=4 SV=1	-	7.02621e-05	8.58733e-05	8.59789e-05	7.36558e-05		-0.291235		-0.223184
CD12560	TRMD_PEPD6	tRNA (guanine-N(1)-)-methyltransferase OS=Peptoclostridium difficile (strain 630) GN=trmD PE=3 SV=1	-	3.16283e-05		1.55665e-05	1.33327e-05		1.02277	**	-0.223476
CD00810	RS17_PEPD6	30S ribosomal protein S17 OS=Peptoclostridium difficile (strain 630) GN=rpsQ PE=3 SV=1	-	0.00276124	0.00221595	0.00220595	0.00188903		0.323919		-0.223756
CD36460	Q181P8_PEPD6	Transcriptional regulator, GntR family OS=Peptoclostridium difficile (strain 630) GN=CD36460 PE=4 SV=1	-	5.14997e-05	4.23986e-05	5.29857e-05	4.53664e-05		-0.0410394		-0.223978
CD28500	Q183T9_PEPD6	Transcriptional regulator, DeoR family OS=Peptoclostridium difficile (strain 630) GN=CD28500 PE=4 SV=1	-	4.15756e-05	2.992e-05	6.1098e-05	5.22551e-05		-0.55539		-0.225554
CD05640	Q189A7_PEPD6	Putative ATP-dependent protease OS=Peptoclostridium difficile (strain 630) GN=CD05640 PE=4 SV=1	-	1.19233e-05		6.55266e-06	5.60028e-06		0.863629		-0.226581
CD27720	Q183K9_PEPD6	Putative glycosyl transferase, family 2 OS=Peptoclostridium difficile (strain 630) GN=tuaG PE=4 SV=1	-	5.99433e-05	3.80397e-05	4.70712e-05	4.01987e-05		0.348755		-0.227695
CD21400	RS2_PEPD6	30S ribosomal protein S2 OS=Peptoclostridium difficile (strain 630) GN=rpsB PE=3 SV=1	-	0.00289842	0.00182519	0.00274345	0.00234225		0.0792708		-0.228096
CD13280	RECA_PEPD6	Protein RecA OS=Peptoclostridium difficile (strain 630) GN=recA PE=3 SV=1	-	0.00024195	0.000395022	0.000305833	0.000261108		-0.338036		-0.228097
CD11530	MGSA_PEPD6	Methylglyoxal synthase OS=Peptoclostridium difficile (strain 630) GN=mgsA PE=3 SV=1	-	0.000174661	0.000102125	0.000141767	0.000120934		0.301038		-0.229293
CD25210	SYL_PEPD6	Leucine--tRNA ligase OS=Peptoclostridium difficile (strain 630) GN=leuS PE=3 SV=1	-	0.000814927	0.000392568	0.000820248	0.000699023		-0.00938962		-0.23072
CD12490	Q18BB3_PEPD6	Putative radical SAM-superfamily protein OS=Peptoclostridium difficile (strain 630) GN=CD12490 PE=4 SV=1	-	1.48264e-05		1.69492e-05	1.44428e-05		-0.193048		-0.230867
CD00581	RL33_PEPD6	50S ribosomal protein L33 OS=Peptoclostridium difficile (strain 630) GN=rpmG PE=3 SV=1	-	0.000155621	0.000153457	0.000136449	0.000116142		0.189677		-0.23248
CD24100	Q181Z4_PEPD6	Pyruvate phosphate dikinase (ATP:pyruvate,phosphate phosphotransferase) OS=Peptoclostridium difficile (strain 630) GN=ppdK PE=4 SV=2	-	0.000250355	0.000175367	0.000311592	0.000264795		-0.315687		-0.234784
CD18660	Q187I0_PEPD6	Putative conjugative transposon protein tn1549-like, CTn5-Orf25 OS=Peptoclostridium difficile (strain 630) GN=CD18660 PE=4 SV=1	-	2.12179e-05	2.71971e-05	2.4586e-05	2.08682e-05		-0.212556		-0.236528
CD02180	Q18CV6_PEPD6	N5-carboxyaminoimidazole ribonucleotide mutase OS=Peptoclostridium difficile (strain 630) GN=purE PE=3 SV=1	-	0.00126238	0.0015452	0.000726632	0.000616325		0.796845	**	-0.237534	**
CD07140	Q189R1_PEPD6	Tetratricopeptide repeat protein OS=Peptoclostridium difficile (strain 630) GN=CD07140 PE=4 SV=1	-	8.63131e-05	7.65818e-05	7.63207e-05	6.46053e-05		0.177505		-0.240422
CD24950	Q182I2_PEPD6	L-seryl-tRNA(Sec) selenium transferase OS=Peptoclostridium difficile (strain 630) GN=selA PE=3 SV=2	-	0.000131694	9.03425e-05	0.000122686	0.000103722		0.10221		-0.242253
CD15990	Q186F5_PEPD6	Phosphomethylpyrimidine kinase OS=Peptoclostridium difficile (strain 630) GN=thiD PE=1 SV=1	-	0.000233685	0.000268031	0.00033443	0.000282532		-0.517136		-0.24329
CD07950	Y795_PEPD6	Probable transcriptional regulatory protein CD07950 OS=Peptoclostridium difficile (strain 630) GN=CD07950 PE=3 SV=1	-	0.000352769	0.000363128	0.000404145	0.000341218		-0.19615		-0.244177
CD02420	Q18CY2_PEPD6	Putative nucleoside triphosphate transferase OS=Peptoclostridium difficile (strain 630) GN=CD02420 PE=4 SV=1	-	0.000390169	0.000466627	0.000675454	0.000569048		-0.791757	**	-0.247309
CD34300	Q180S7_PEPD6	Cobalt-precorrin-8X methylmutase (Cobalt-precorrin isomerase) (HBA synthase) OS=Peptoclostridium difficile (strain 630) GN=cbiC PE=4 SV=1	-	0.000283826	0.000371742	0.000170449	0.000143522		0.73567		-0.248068
CD24930	Q182I0_PEPD6	Selenocysteinyl-tRNA-specific translation factor OS=Peptoclostridium difficile (strain 630) GN=selB PE=4 SV=1	-	8.76503e-05	4.77044e-05	0.000107777	9.06895e-05		-0.298217		-0.249041
CD15560	Q18C76_PEPD6	Putative polysaccharide deacetylase OS=Peptoclostridium difficile (strain 630) GN=CD15560 PE=4 SV=1	-	0.000126013	3.17723e-05	7.33168e-05	6.16006e-05		0.781361	**	-0.251201
CD06020	Q189F0_PEPD6	Uncharacterized protein OS=Peptoclostridium difficile (strain 630) GN=CD06020 PE=4 SV=1	-		1.31845e-05	4.43964e-05	3.7203e-05		OFF		-0.255024
CD05370	Q188Y2_PEPD6	Putative CheY-like chemosensory protein OS=Peptoclostridium difficile (strain 630) GN=CD05370 PE=4 SV=1	-	1.30329e-05	2.27835e-05	1.66527e-05	1.39498e-05		-0.353601	**	-0.255515
CD08310	Q18A25_PEPD6	Putative ATP-dependent RNA helicase OS=Peptoclostridium difficile (strain 630) GN=CD08310 PE=4 SV=1	-	1.24275e-05		1.28844e-05	1.07837e-05		-0.0520858		-0.256771
CD36000	Q181K2_PEPD6	Two-component response regulator, CheY family OS=Peptoclostridium difficile (strain 630) GN=CD36000 PE=4 SV=1	-	2.16064e-05	2.90673e-05	2.57723e-05	2.15566e-05		-0.254363		-0.257691
CD24600	DNAJ_PEPD6	Chaperone protein DnaJ OS=Peptoclostridium difficile (strain 630) GN=dnaJ PE=3 SV=1	-	0.000733332	0.00043809	0.000355922	0.000297669		1.04291	**	-0.257853
CD02930	Q18D31_PEPD6	ABC-type transport system,bacitracin/multidrug-family ATP-binding protein OS=Peptoclostridium difficile (strain 630) GN=CD02930 PE=4 SV=2	-			5.21015e-05	4.34985e-05		OFF		-0.260359
CD26550	Q182Y9_PEPD6	UDP-N-acetylmuramoyl-tripeptide--D-alanyl-D-alanine ligase OS=Peptoclostridium difficile (strain 630) GN=murF PE=3 SV=1	-	0.000260458	0.000160865	0.000225083	0.000187698		0.210589		-0.262044
CD00930	Q18CI3_PEPD6	Ribosomal protein L14E/L6E/L27E-like OS=Peptoclostridium difficile (strain 630) GN=CD00930 PE=4 SV=2	-	0.00015999	7.94324e-05	7.61438e-05	6.33765e-05		1.07119	**	-0.26478
CD35150	GLMU_PEPD6	Bifunctional protein GlmU OS=Peptoclostridium difficile (strain 630) GN=glmU PE=3 SV=1	-	0.00036056	0.000333651	0.000273472	0.000227332		0.398844		-0.266594
CD35010	Q181A0_PEPD6	Transcription-repair-coupling factor OS=Peptoclostridium difficile (strain 630) GN=mfd PE=3 SV=1	-	5.28117e-05	1.40145e-05	4.14884e-05	3.448e-05		0.34815		-0.266947
CD32240	Q17ZW9_PEPD6	Aspartate-semialdehyde dehydrogenase OS=Peptoclostridium difficile (strain 630) GN=asd PE=3 SV=1	-	0.000721478	0.000891655	0.000610273	0.000506744		0.2415		-0.268199
CD12500	Q18BB2_PEPD6	Chromosome partition protein Smc OS=Peptoclostridium difficile (strain 630) GN=smc PE=3 SV=1	-	5.04668e-05	6.28002e-05	7.72467e-05	6.4077e-05		-0.614139		-0.269667
CD35830	Q181I6_PEPD6	Transcriptional regulator, MerR family OS=Peptoclostridium difficile (strain 630) GN=CD35830 PE=4 SV=1	-		1.53798e-05	2.11922e-05	1.75546e-05		OFF		-0.271687
CD11350	Q18AZ7_PEPD6	Putative SH3-domain protein OS=Peptoclostridium difficile (strain 630) GN=CD11350 PE=4 SV=1	-	0.000711299	0.00113864	0.000821545	0.000680289		-0.207883		-0.272191
CD10610	Q18AR5_PEPD6	Uncharacterized protein OS=Peptoclostridium difficile (strain 630) GN=CD10610 PE=4 SV=1	-	7.72454e-05	0.000105649	0.000105809	8.76066e-05		-0.45394		-0.272349
CD05330	Q188X9_PEPD6	Chemotaxis protein CheY OS=Peptoclostridium difficile (strain 630) GN=cheY PE=4 SV=1	-	3.14685e-05	4.26049e-05	2.75193e-05	2.27839e-05		0.193464		-0.272429
CD34660	Q180W4_PEPD6	Holo-[acyl-carrier-protein] synthase OS=Peptoclostridium difficile (strain 630) GN=acpS PE=3 SV=1	-		1.25495e-05	1.32985e-05	1.10041e-05		OFF		-0.273217
CD27190	Q183F4_PEPD6	Putative polysaccharide deacetylase OS=Peptoclostridium difficile (strain 630) GN=CD27190 PE=4 SV=1	-	2.0973e-05	3.70671e-05	2.85189e-05	2.35834e-05		-0.443389		-0.274145
CD12270	Q18B89_PEPD6	Putative O-methyltransferase OS=Peptoclostridium difficile (strain 630) GN=CD12270 PE=4 SV=1	-	3.22443e-05		2.19156e-05	1.80915e-05		0.557086		-0.276644
CD02240	Q18CW4_PEPD6	Phosphoribosylamine--glycine ligase OS=Peptoclostridium difficile (strain 630) GN=purD PE=3 SV=1	-	0.000497122	0.000678405	0.000399258	0.000329105		0.31628		-0.278774
CD35430	Q181E1_PEPD6	Nicotinate phosphoribosyltransferase OS=Peptoclostridium difficile (strain 630) GN=CD35430 PE=3 SV=1	-	0.000152144	0.000100526	0.000191758	0.000157883		-0.333848		-0.280433
CD32190	HSLO_PEPD6	33 kDa chaperonin OS=Peptoclostridium difficile (strain 630) GN=hslO PE=3 SV=1	-	8.96383e-05	6.75292e-05	6.11482e-05	5.02594e-05		0.551805		-0.282916
CD13150	Q18BI2_PEPD6	Riboflavin biosynthesis protein OS=Peptoclostridium difficile (strain 630) GN=ribC PE=4 SV=1	-	5.63451e-05	4.96357e-05	5.96329e-05	4.89828e-05		-0.081819		-0.283834
CD16820	Q186N9_PEPD6	Putative nucleoside hydrolase, IUNH family OS=Peptoclostridium difficile (strain 630) GN=iunH PE=4 SV=1	-	0.00102046	0.000767562	0.000854916	0.000701303		0.255364		-0.285745
CD06870	RL20_PEPD6	50S ribosomal protein L20 OS=Peptoclostridium difficile (strain 630) GN=rplT PE=3 SV=1	-	0.00247576	0.00161231	0.00186639	0.00152965		0.407626	**	-0.287047
CD18320	Q187E1_PEPD6	3-deoxy-D-arabino-heptulosonate 7-phosphate synthase OS=Peptoclostridium difficile (strain 630) GN=aroF1 PE=4 SV=1	-	0.000173856	8.11393e-05	0.000137865	0.000112945		0.334645		-0.287628
CD05440	Q188Y6_PEPD6	Putative ornithine cyclodeaminase OS=Peptoclostridium difficile (strain 630) GN=CD05440 PE=4 SV=1	-	0.000150691	0.000203775	0.000171557	0.000139805		-0.187099		-0.29527
CD05350	Q188X7_PEPD6	Probable chemoreceptor glutamine deamidase CheD OS=Peptoclostridium difficile (strain 630) GN=cheD PE=3 SV=1	-		6.47844e-06	5.28309e-06	4.30398e-06		OFF		-0.29571
CD35230	RSMA_PEPD6	Ribosomal RNA small subunit methyltransferase A OS=Peptoclostridium difficile (strain 630) GN=rsmA PE=3 SV=1	-	0.000167254	0.000140148	0.000179562	0.000146259		-0.102441		-0.295951
CD16520	Q186K8_PEPD6	Putative tellurium resistance protein OS=Peptoclostridium difficile (strain 630) GN=CD16520 PE=4 SV=1	-	6.69207e-05	0.000137138	0.00022403	0.000182217		-1.74317	**	-0.298035
CD04910	Q188T5_PEPD6	PTS system, mannose/fructose/sorbose IIA component OS=Peptoclostridium difficile (strain 630) GN=CD04910 PE=4 SV=1	-	1.19801e-05		1.13204e-05	9.20062e-06		0.0817149		-0.299119	**
CD23980	Q181Y4_PEPD6	Putative 2-thiocytidine tRNA biosynthesis protein TtcA OS=Peptoclostridium difficile (strain 630) GN=CD23980 PE=4 SV=1	-	7.20142e-05	4.90383e-05	7.44243e-05	6.04495e-05		-0.0474929		-0.300044
CD32690	Q180B4_PEPD6	Putative oligoendopeptidase F, M3B family OS=Peptoclostridium difficile (strain 630) GN=CD32690 PE=4 SV=1	-	0.000149329	0.000117372	0.000142216	0.000115354		0.0704098		-0.302017
CD07540	THII_PEPD6	Probable tRNA sulfurtransferase OS=Peptoclostridium difficile (strain 630) GN=thiI PE=3 SV=1	-	0.000138104	0.000145957	7.3033e-05	5.91571e-05		0.919136	**	-0.303997
CD19750	MIAA_PEPD6	tRNA dimethylallyltransferase OS=Peptoclostridium difficile (strain 630) GN=miaA PE=3 SV=2	-	4.20061e-05	6.43882e-05	3.86968e-05	3.13017e-05		0.118384		-0.305972
CD00300	Q18CB5_PEPD6	Putative membrane protein OS=Peptoclostridium difficile (strain 630) GN=CD00300 PE=4 SV=1	-	3.47789e-05	1.09597e-05	2.53198e-05	2.0474e-05		0.457946		-0.306471
CD24050	Q181Z1_PEPD6	Transcriptional regulator, MarR family OS=Peptoclostridium difficile (strain 630) GN=CD24050 PE=4 SV=1	-	3.3745e-05	2.56447e-05	2.54155e-05	2.05239e-05		0.408965		-0.308403
CD35480	Q181E9_PEPD6	Putative YaaT-like protein involved in sporulation or related to DNA replication OS=Peptoclostridium difficile (strain 630) GN=CD35480 PE=4 SV=1	-	0.00021785	0.000173763	0.000165897	0.000133958		0.393045		-0.308503
CD08910	Q18A84_PEPD6	Agmatinase (Agmatine ureohydrolase) (AUH) OS=Peptoclostridium difficile (strain 630) GN=speB PE=1 SV=1	-	0.000321043	0.000217611	0.000222964	0.000179645		0.525957		-0.311658	**
CD24460	F3Y610_PEPD6	Putative aspartyl/glutamyl-tRNA amidotransferase subunit B-related OS=Peptoclostridium difficile (strain 630) GN=CD24460 PE=4 SV=1	-	0.000928424	0.000443607	0.000448358	0.000360959		1.05013	**	-0.312814
CD34790	UPP_PEPD6	Uracil phosphoribosyltransferase OS=Peptoclostridium difficile (strain 630) GN=upp PE=3 SV=1	-	0.000522497	0.000421581	0.000556321	0.000447007		-0.0904936		-0.315618
CD17210	Q186S8_PEPD6	Uncharacterized protein OS=Peptoclostridium difficile (strain 630) GN=CD17210 PE=4 SV=1	-	1.47517e-05	1.62707e-05	7.68598e-06	6.17395e-06		0.940577		-0.316034
CD35570	Q181F9_PEPD6	Putative peptidase OS=Peptoclostridium difficile (strain 630) GN=CD35570 PE=4 SV=1	-		1.63582e-05	2.26857e-05	1.82131e-05		OFF		-0.316809
CD01070	Q18CJ7_PEPD6	Aspartate aminotransferase OS=Peptoclostridium difficile (strain 630) GN=aspC PE=3 SV=1	-	0.00152242	0.00231026	0.00148427	0.00119024		0.0366152		-0.318497
CD10230	Q18AM4_PEPD6	Putative transcriptional regulator, HTH OS=Peptoclostridium difficile (strain 630) GN=CD10230 PE=4 SV=1	-	0.000113027	6.79343e-05	7.16475e-05	5.7364e-05		0.657684		-0.32077
CD27700	Q183K4_PEPD6	Putative glycosyl transferase, group 1 OS=Peptoclostridium difficile (strain 630) GN=CD27700 PE=4 SV=1	-	4.57084e-05	2.80135e-05	3.98158e-05	3.18781e-05		0.199121		-0.320774
CD14570	Q18BX9_PEPD6	Putative GTP cyclohydrolase 1 type 2 OS=Peptoclostridium difficile (strain 630) GN=CD14570 PE=3 SV=1	-	9.35823e-05	0.000139689	9.5462e-05	7.63368e-05		-0.0286914		-0.322547
CD26640	MURE_PEPD6	UDP-N-acetylmuramoyl-L-alanyl-D-glutamate--2,6-diaminopimelate ligase OS=Peptoclostridium difficile (strain 630) GN=murE PE=3 SV=1	-	2.94694e-05	8.06159e-05	5.84163e-05	4.65279e-05		-0.987153	**	-0.328275
CD07150	Q189Q9_PEPD6	Phosphate butyryltransferase (Phosphotransbutyrylase) OS=Peptoclostridium difficile (strain 630) GN=ptb1 PE=4 SV=1	-	0.000169306	0.00028939	0.000433441	0.000344437		-1.3562	**	-0.331594
CD35390	Q181D6_PEPD6	Putative deoxyribonuclease OS=Peptoclostridium difficile (strain 630) GN=CD35390 PE=4 SV=1	-	7.40826e-05	3.66741e-05	8.94597e-05	7.10869e-05		-0.272102		-0.331654
CD28470	Q183T2_PEPD6	Uncharacterized protein OS=Peptoclostridium difficile (strain 630) GN=CD28470 PE=4 SV=1	-	4.4788e-05	4.17254e-05	3.59579e-05	2.85632e-05		0.316805		-0.332148
CD00690	RS7_PEPD6	30S ribosomal protein S7 OS=Peptoclostridium difficile (strain 630) GN=rpsG PE=3 SV=1	-	0.00658238	0.00416005	0.00516426	0.00409608		0.350047		-0.334316
CD18390	Q187E8_PEPD6	Prephenate dehydrogenase OS=Peptoclostridium difficile (strain 630) GN=tyrC PE=4 SV=1	-	7.47204e-05	4.22795e-05	7.08581e-05	5.61931e-05		0.0765686		-0.334541
CD07900	Q189Y6_PEPD6	Putative hydrolase, NUDIX family OS=Peptoclostridium difficile (strain 630) GN=CD07900 PE=4 SV=1	-	0.00050974	0.000791766	0.000941883	0.000745872		-0.885786	**	-0.33662
CD07690	Q189W6_PEPD6	Putative oxidoreductase subunit OS=Peptoclostridium difficile (strain 630) GN=CD07690 PE=4 SV=1	-	2.75902e-05		2.07725e-05	1.64407e-05		0.409479		-0.337406	**
CD14970	Q18C17_PEPD6	Uncharacterised protein OS=Peptoclostridium difficile (strain 630) GN=CD14970 PE=4 SV=1	-	2.22294e-05	4.88449e-05	6.95358e-05	5.49977e-05		-1.64529	**	-0.338386
CD25810	Q182R9_PEPD6	Ribosomal RNA small subunit methyltransferase B OS=Peptoclostridium difficile (strain 630) GN=rsmB PE=4 SV=1	-	1.23574e-05		9.65499e-06	7.63345e-06		0.35603		-0.338939
CD10400	ADDB_PEPD6	ATP-dependent helicase/deoxyribonuclease subunit B OS=Peptoclostridium difficile (strain 630) GN=addB PE=3 SV=1	-	1.98321e-05	1.72965e-05	2.15213e-05	1.69837e-05		-0.117929		-0.341619
CD25270	Q182L5_PEPD6	Transcriptional regulator, TetR family OS=Peptoclostridium difficile (strain 630) GN=CD25270 PE=4 SV=2	-	1.74969e-05		1.19331e-05	9.41155e-06		0.55213		-0.342462	**
CD08410	Q18A34_PEPD6	5-aminoimidazole-4-carboxamide ribonucleotide transformylase OS=Peptoclostridium difficile (strain 630) GN=CD08410 PE=4 SV=1	-	0.000171301	0.000230331	0.000187965	0.000148152		-0.133926		-0.343381
CD18740	Q187I8_PEPD6	ABC-type transport system, ATP-binding protein Tn1549-like, CTn5-Orf34 OS=Peptoclostridium difficile (strain 630) GN=vexP2 PE=3 SV=1	-	1.14438e-05		8.4143e-06	6.62663e-06		0.443647	**	-0.344568	**
CD00600	Q18CE6_PEPD6	Transcription termination/antitermination protein NusG OS=Peptoclostridium difficile (strain 630) GN=nusG PE=3 SV=1	-	0.000738704	0.000339208	0.000521948	0.000410873		0.501089		-0.345212
CD12140	Q18B74_PEPD6	Stage 0 sporulation protein A OS=Peptoclostridium difficile (strain 630) GN=spo0A PE=4 SV=1	-	0.000323484	0.000316888	0.000409261	0.000321954		-0.339326		-0.346168
CD26180	Q182V2_PEPD6	Isoleucine--tRNA ligase OS=Peptoclostridium difficile (strain 630) GN=ileS PE=3 SV=1	-	0.000823729	0.000467785	0.0009182	0.000722249		-0.156638		-0.346314
CD13160	RS15_PEPD6	30S ribosomal protein S15 OS=Peptoclostridium difficile (strain 630) GN=rpsO PE=3 SV=1	-	0.00136854	0.000909872	0.0013817	0.00108393		-0.013799		-0.350164
CD17180	X1W3M5_PEPD6	Putative hydantoinase OS=Peptoclostridium difficile (strain 630) GN=CD17180 PE=4 SV=1	-	7.82189e-05	4.13966e-05	9.14846e-05	7.15428e-05		-0.226011		-0.354723
CD21280	Q185R7_PEPD6	4-hydroxy-3-methylbut-2-en-1-yl diphosphate synthase OS=Peptoclostridium difficile (strain 630) GN=ispG PE=3 SV=1	-	0.000131	0.000122158	0.000168725	0.000131729		-0.365108		-0.357098
CD34590	Q180V8_PEPD6	Transketolase, pyridine binding subunit OS=Peptoclostridium difficile (strain 630) GN=tkt2 PE=4 SV=1	-	0.000318295	0.000483493	0.000371796	0.000289792		-0.224148		-0.35949
CD21550	Q185U5_PEPD6	Biotin synthase OS=Peptoclostridium difficile (strain 630) GN=bioB1 PE=4 SV=2	-	3.11503e-05	4.31284e-05	3.70501e-05	2.88607e-05		-0.250234		-0.360369
CD34630	Q180W0_PEPD6	Alanine racemase OS=Peptoclostridium difficile (strain 630) GN=alr2 PE=1 SV=1	-	0.000445477	0.000851054	0.000616994	0.000480412		-0.469907	**	-0.360986
CD20270	Q187Z4_PEPD6	N-carbamoyl-L-amino acid hydrolase OS=Peptoclostridium difficile (strain 630) GN=CD20270 PE=4 SV=1	-	0.000147856	0.000179002	0.000196288	0.000152493		-0.408778		-0.364229
CD36760	MNME_PEPD6	tRNA modification GTPase MnmE OS=Peptoclostridium difficile (strain 630) GN=mnmE PE=3 SV=1	-	9.79067e-05	7.27782e-05	0.000101673	7.89213e-05		-0.0544574		-0.365451
CD27010	Q183D5_PEPD6	Putative lipoprotein OS=Peptoclostridium difficile (strain 630) GN=CD27010 PE=1 SV=1	-	0.000357177	0.000367689	0.000296768	0.000230218		0.267306	**	-0.366335
CD16930	Q186Q2_PEPD6	Putative dinitrogenase iron-molybdenum cofactor OS=Peptoclostridium difficile (strain 630) GN=CD16930 PE=4 SV=1	-	0.00712507	0.00401314	0.00417759	0.00323687		0.770234	**	-0.368071
CD36660	Q181R7_PEPD6	Uncharacterized protein OS=Peptoclostridium difficile (strain 630) GN=CD36660 PE=4 SV=1	-			5.94619e-05	4.60198e-05		OFF		-0.369713
CD23930	Q181X7_PEPD6	Putative glycosyl transferase, family 51 OS=Peptoclostridium difficile (strain 630) GN=CD23930 PE=4 SV=1	-	2.95034e-05	3.30876e-05	3.70085e-05	2.86407e-05		-0.326976		-0.369793
CD35000	Q180Z8_PEPD6	Peptidylprolyl isomerase PrsA-like OS=Peptoclostridium difficile (strain 630) GN=prsA1 PE=4 SV=1	-	0.000208815	0.00023658	0.000246249	0.000190525		-0.237891		-0.370135
CD05210	Q188W8_PEPD6	Two-component response regulator OS=Peptoclostridium difficile (strain 630) GN=CD05210 PE=4 SV=1	-	2.60895e-05	1.9945e-05	2.33187e-05	1.80386e-05		0.161978		-0.370399
CD00680	RS12_PEPD6	30S ribosomal protein S12 OS=Peptoclostridium difficile (strain 630) GN=rpsL PE=3 SV=2	-	0.00162687	0.00106895	0.0012394	0.000957801		0.392459	**	-0.371846
CD26300	Q182W5_PEPD6	Glycerol-3-phosphate dehydrogenase [NAD(P)+] OS=Peptoclostridium difficile (strain 630) GN=gpsA PE=3 SV=1	-	0.000191174	0.000205159	0.000140302	0.000108341		0.446349	**	-0.372953
CD08550	Q18A51_PEPD6	ABC-type transport system, oligopeptide-family extracellular solute-binding protein OS=Peptoclostridium difficile (strain 630) GN=oppA PE=4 SV=1	-	0.000103794	0.000174965	0.000209809	0.000161835		-1.01535	**	-0.37455
CD22580	Q185D3_PEPD6	Uncharacterized protein OS=Peptoclostridium difficile (strain 630) GN=CD22580 PE=4 SV=1	-	4.73357e-05	7.09514e-05	6.59328e-05	5.08009e-05		-0.478066		-0.376143
CD15270	Q18C46_PEPD6	ABC-type transport system, permease OS=Peptoclostridium difficile (strain 630) GN=CD15270 PE=4 SV=1	-	7.82316e-05	7.60117e-05	6.99651e-05	5.38854e-05		0.161116		-0.37674
CD27400	SYH_PEPD6	Histidine--tRNA ligase OS=Peptoclostridium difficile (strain 630) GN=hisS PE=3 SV=1	-	0.000499685	0.000259377	0.000452862	0.000348715		0.141949		-0.377022
CD14480	Q18BW8_PEPD6	Uncharacterized protein OS=Peptoclostridium difficile (strain 630) GN=CD14480 PE=4 SV=1	-		8.0714e-06	1.05002e-05	8.08512e-06		OFF		-0.377071	**
CD06990	Q189P4_PEPD6	Phenylalanine--tRNA ligase alpha subunit OS=Peptoclostridium difficile (strain 630) GN=pheS PE=3 SV=2	-	0.000403656	0.000358523	0.00052679	0.000405207		-0.384103		-0.378569
CD16390	Q186J3_PEPD6	Putative tellurite associated resistance protein OS=Peptoclostridium difficile (strain 630) GN=CD16390 PE=4 SV=1	-	0.000820506	0.000929223	0.00100665	0.000773715		-0.294975		-0.379687
CD01300	METK_PEPD6	S-adenosylmethionine synthase OS=Peptoclostridium difficile (strain 630) GN=metK PE=3 SV=1	-	0.00196773	0.00147941	0.00292687	0.00224148		-0.572824	**	-0.384904
CD35700	Q181H2_PEPD6	Putative peptidase, M19 family OS=Peptoclostridium difficile (strain 630) GN=CD35700 PE=4 SV=1	-	7.35605e-05	6.05696e-05	8.39658e-05	6.42999e-05		-0.190872		-0.384987
CD34880	Q180Y5_PEPD6	UTP--glucose-1-phosphate uridylyltransferase OS=Peptoclostridium difficile (strain 630) GN=gtaB1 PE=3 SV=1	-	0.000187727	0.000274575	0.000174653	0.000133731		0.104143		-0.385163
CD34240	Q180S0_PEPD6	Cobalt-precorrin-3B C(17)-methyltransferase (Cobalt-precorrin-3 methyltransferase) (Cobalt-precorrin-3 methylase) OS=Peptoclostridium difficile (strain 630) GN=cbiH PE=4 SV=1	-	0.000150319	0.00012085	0.000182554	0.000139743		-0.280292	**	-0.385548	**
CD36680	Q181S0_PEPD6	Transcriptional regulator, TPR family OS=Peptoclostridium difficile (strain 630) GN=CD36680 PE=4 SV=1	-	1.84197e-05	1.83038e-05	0.000322495	0.000245704		-4.12995	**	-0.392358
CD18360	Q187E6_PEPD6	Bifunctional P-protein, chorismate mutase/prephenate dehydratase OS=Peptoclostridium difficile (strain 630) GN=pheA PE=4 SV=1	-	7.63132e-05	2.83876e-05	7.15499e-05	5.44513e-05		0.0929844		-0.393982
CD20990	Q188G6_PEPD6	Xanthine dehydrogenase subunit XdhD,molybdopterin-binding OS=Peptoclostridium difficile (strain 630) GN=XdhD PE=4 SV=1	-	0.000234813	0.000120799	0.000332029	0.000252233		-0.499794		-0.39655
CD17790	Q186Y8_PEPD6	Uncharacterized protein OS=Peptoclostridium difficile (strain 630) GN=CD17790 PE=4 SV=1	-	4.19993e-05	2.45569e-05	4.0783e-05	3.09178e-05		0.0423979		-0.39953	**
CD00980	RPOA_PEPD6	DNA-directed RNA polymerase subunit alpha OS=Peptoclostridium difficile (strain 630) GN=rpoA PE=3 SV=1	-	0.00197952	0.00147049	0.00157374	0.00118755		0.330957		-0.406204
CD28480	Q183T1_PEPD6	Uncharacterized protein OS=Peptoclostridium difficile (strain 630) GN=CD28480 PE=4 SV=1	-	5.81792e-05	4.48695e-05	4.86842e-05	3.66759e-05		0.25705		-0.408619	**
CD02220	Q18CW1_PEPD6	Phosphoribosylglycinamide formyltransferase OS=Peptoclostridium difficile (strain 630) GN=purN PE=4 SV=1	-	0.000107808	0.00011608	0.000110507	8.31946e-05		-0.0356662		-0.40957	**
CD15340	Q18C54_PEPD6	Gamma-glutamyltranspeptidase OS=Peptoclostridium difficile (strain 630) GN=ggt PE=4 SV=1	-	4.64702e-05	7.0308e-05	6.61049e-05	4.97271e-05		-0.508451		-0.410724
CD00940	IF1_PEPD6	Translation initiation factor IF-1 OS=Peptoclostridium difficile (strain 630) GN=infA PE=3 SV=1	-	0.000309959	0.000245538	0.000240738	0.000181041		0.364614		-0.411148
CD36540	Q181Q5_PEPD6	Helicase loader ATPase, dnaI OS=Peptoclostridium difficile (strain 630) GN=dnaI PE=4 SV=1	-	3.32851e-05	3.98533e-05	3.31681e-05	2.49194e-05		0.00508014		-0.412525
CD12170	Q18B77_PEPD6	Putative glycosyl transferase, family 2 OS=Peptoclostridium difficile (strain 630) GN=CD12170 PE=4 SV=1	-	7.49463e-05	4.78704e-05	6.55738e-05	4.9164e-05		0.192738		-0.415518
CD05580	GLSA_PEPD6	Glutaminase OS=Peptoclostridium difficile (strain 630) GN=glsA PE=3 SV=1	-	3.56266e-05	4.21322e-05	6.06614e-05	4.54644e-05		-0.767824	**	-0.416041
CD16000	THIM_PEPD6	Hydroxyethylthiazole kinase OS=Peptoclostridium difficile (strain 630) GN=thiM PE=3 SV=1	-	0.000182059	0.000304337	0.00042035	0.000315021		-1.20718	**	-0.416143
CD18240	Q187D1_PEPD6	P-type calcium transport ATPase OS=Peptoclostridium difficile (strain 630) GN=CD18240 PE=3 SV=1	-	1.99518e-06		8.33513e-06	6.24448e-06		-2.06269		-0.416623
CD34800	Q180X7_PEPD6	Ribose-5-phosphate isomerase 2 OS=Peptoclostridium difficile (strain 630) GN=rpiB2 PE=4 SV=1	-	0.000253978	0.000273477	0.000337951	0.000252801		-0.412109	**	-0.418809
CD11450	Q18B05_PEPD6	Rod shape-determining protein MreB OS=Peptoclostridium difficile (strain 630) GN=mreB2 PE=4 SV=1	-	0.00116927	0.00130027	0.00179323	0.00134108		-0.616955	**	-0.419173
CD10050	Q18AK8_PEPD6	Putative NAD-dependent malic enzyme OS=Peptoclostridium difficile (strain 630) GN=CD10050 PE=3 SV=1	-	0.00022463	0.000255736	0.000179338	0.000134095		0.324871		-0.419432
CD05280	Q188X2_PEPD6	Putative amidohydrolase OS=Peptoclostridium difficile (strain 630) GN=CD05280 PE=4 SV=1	-	6.57747e-05	4.64285e-05	3.77203e-05	2.81593e-05		0.802194		-0.42173
CD15820	Q186D5_PEPD6	Histidinol dehydrogenase OS=Peptoclostridium difficile (strain 630) GN=hisD PE=3 SV=1	-	7.66798e-05	2.90949e-05	6.2012e-05	4.61128e-05		0.306299		-0.427379
CD24500	Q182D8_PEPD6	Ribosomal protein L11 methyltransferase OS=Peptoclostridium difficile (strain 630) GN=prmA PE=3 SV=1	-	0.000165964	0.000152624	0.000150743	0.000112035		0.138775		-0.428151
CD27140	Q183E8_PEPD6	UDP-glucose 4-epimerase OS=Peptoclostridium difficile (strain 630) GN=galE PE=3 SV=1	-	0.000201571	0.000237051	0.000205362	0.000152451		-0.0268826		-0.429818
CD09420	Q184B7_PEPD6	Putative phage protein OS=Peptoclostridium difficile (strain 630) GN=CD09420 PE=4 SV=1	-		3.27418e-05	3.64527e-05	2.70247e-05		OFF		-0.431748
CD24880	Q182H5_PEPD6	PTS system, fructose-like IIA component OS=Peptoclostridium difficile (strain 630) GN=CD24880 PE=4 SV=1	-			8.09576e-06	6.00005e-06		OFF		-0.432194
CD16870	Q186P2_PEPD6	Putative lipoprotein OS=Peptoclostridium difficile (strain 630) GN=CD16870 PE=4 SV=1	-	2.15933e-05	3.55059e-05	3.34449e-05	2.47789e-05		-0.631202	**	-0.432674
CD36420	Q181P5_PEPD6	Putative selenocysteine synthase OS=Peptoclostridium difficile (strain 630) GN=CD36420 PE=4 SV=1	-	1.68345e-05	3.97986e-05	3.07536e-05	2.27722e-05		-0.869337	**	-0.433485
CD35300	Q181C9_PEPD6	ABC-type transport system, iron-family ATP-binding protein OS=Peptoclostridium difficile (strain 630) GN=CD35300 PE=3 SV=1	-	3.91069e-05	2.92499e-05	8.31093e-05	6.12092e-05		-1.08759	**	-0.441263
CD34970	Q180Z6_PEPD6	Bifunctional protein OS=Peptoclostridium difficile (strain 630) GN=CD34970 PE=4 SV=1	-	8.47259e-05	5.4541e-05	7.07e-05	5.19356e-05		0.261092		-0.444988
CD21100	Q185P9_PEPD6	Putative transaldolase C-like OS=Peptoclostridium difficile (strain 630) GN=CD21100 PE=3 SV=1	-	5.864e-05	7.83549e-05	7.94769e-05	5.83367e-05		-0.43865	**	-0.446131	**
CD36070	Q181L1_PEPD6	Putative iron-sulfur assembly protein OS=Peptoclostridium difficile (strain 630) GN=CD36070 PE=4 SV=1	-	0.000103613	0.00014488	0.000147517	0.000107981		-0.509678	**	-0.450102
CD12550	RIMM_PEPD6	Ribosome maturation factor RimM OS=Peptoclostridium difficile (strain 630) GN=rimM PE=3 SV=1	-	0.000348083	0.000376713	0.000188117	0.00013748		0.887799	**	-0.452415
CD00110	Q18C92_PEPD6	RNA polymerase sigma-B factor (Sigma-37) OS=Peptoclostridium difficile (strain 630) GN=sigB PE=4 SV=1	-	4.04386e-05	4.76111e-05	4.08594e-05	2.98556e-05		-0.014937		-0.452666
CD08810	Q18A72_PEPD6	Uncharacterized protein OS=Peptoclostridium difficile (strain 630) GN=CD08810 PE=4 SV=1	-	0.000108824	0.000234615	0.000277081	0.000202444		-1.34831	**	-0.452784
CD21560	Q185U4_PEPD6	Thiamine biosynthesis protein ThiH OS=Peptoclostridium difficile (strain 630) GN=thiH PE=4 SV=1	-	0.000289452	0.000145038	0.000324361	0.000236298		-0.164278		-0.456994
CD07350	Q189S9_PEPD6	Uncharacterized protein OS=Peptoclostridium difficile (strain 630) GN=CD07350 PE=4 SV=1	-	4.44243e-05	7.88272e-05	5.76144e-05	4.1817e-05		-0.37508		-0.462341
CD12190	Q18B83_PEPD6	Uncharacterized protein OS=Peptoclostridium difficile (strain 630) GN=CD12190 PE=4 SV=1	-	4.20314e-05	6.38289e-05	5.21217e-05	3.7709e-05		-0.310414		-0.466974
CD12260	Q18B90_PEPD6	Putative aminodeoxychorismate lyase OS=Peptoclostridium difficile (strain 630) GN=CD12260 PE=4 SV=1	-	5.98568e-05	4.90478e-05	3.65974e-05	2.64098e-05		0.709774		-0.470668
CD34390	COBT_PEPD6	Nicotinate-nucleotide--dimethylbenzimidazole phosphoribosyltransferase OS=Peptoclostridium difficile (strain 630) GN=cobT PE=3 SV=1	-	0.000394875	0.000645427	0.000517811	0.00037356		-0.391028		-0.471085
CD04040	Q188J0_PEPD6	Uncharacterized protein OS=Peptoclostridium difficile (strain 630) GN=CD04040 PE=4 SV=1	-	6.40836e-05	2.7036e-05	6.52665e-05	4.70072e-05		-0.0263873		-0.47346
CD09940	Q18AJ4_PEPD6	Putative serine-pyruvate aminotransferase OS=Peptoclostridium difficile (strain 630) GN=CD09940 PE=3 SV=1	-	0.000173571	0.000104693	5.62877e-05	4.04962e-05		1.62463	**	-0.475034
CD25000	ARLY_PEPD6	Argininosuccinate lyase OS=Peptoclostridium difficile (strain 630) GN=argH PE=3 SV=2	-	7.79011e-05	7.29701e-05	5.72484e-05	4.11009e-05		0.444407		-0.478064
CD00500	SYP2_PEPD6	Proline--tRNA ligase 2 OS=Peptoclostridium difficile (strain 630) GN=proS2 PE=3 SV=1	-	0.000721477	0.000921238	0.00156412	0.00112231		-1.11632	**	-0.478878
CD27150	Q183E9_PEPD6	UTP--glucose-1-phosphate uridylyltransferase OS=Peptoclostridium difficile (strain 630) GN=gtaB PE=3 SV=1	-	0.000308935	0.000336162	0.000287746	0.000205925		0.102506		-0.482674
CD17590	Q186W9_PEPD6	Methyltransferase domain protein OS=Peptoclostridium difficile (strain 630) GN=CD17590 PE=4 SV=1	-	9.03044e-05	4.59326e-05	8.01411e-05	5.73134e-05		0.172254		-0.48367
CD18330	Q187E4_PEPD6	3-dehydroquinate synthase OS=Peptoclostridium difficile (strain 630) GN=aroB PE=3 SV=1	-	0.000106992	7.31056e-05	0.000102325	7.304e-05		0.0643419		-0.486397
CD10440	Q18AP2_PEPD6	Putative membrane protein OS=Peptoclostridium difficile (strain 630) GN=CD10440 PE=4 SV=1	-	7.6475e-05	3.34108e-05	7.39484e-05	5.27825e-05		0.0484708		-0.486459
CD00800	RL16_PEPD6	50S ribosomal protein L16 OS=Peptoclostridium difficile (strain 630) GN=rplP PE=3 SV=1	-	0.0016086	0.00107141	0.0013229	0.00094126		0.282104		-0.491033
CD13100	RBFA_PEPD6	Ribosome-binding factor A OS=Peptoclostridium difficile (strain 630) GN=rbfA PE=3 SV=1	-	0.000206137	9.20727e-05	9.81664e-05	6.9678e-05		1.0703	**	-0.494527
CD22630	Q185D5_PEPD6	Peptidyl-prolyl cis-trans isomerase, PpiC-type OS=Peptoclostridium difficile (strain 630) GN=prsA PE=4 SV=1	-	0.000932562	0.000794116	0.00108267	0.000767807		-0.215324		-0.495779
CD08070	Q18A06_PEPD6	Uncharacterised protein OS=Peptoclostridium difficile (strain 630) GN=CD08070 PE=4 SV=1	-	6.91044e-05	0.000177175	0.000139367	9.85721e-05		-1.01204	**	-0.499639
CD02410	Q18CY3_PEPD6	Flagella glycosylation phosphoserine phosphatase OS=Peptoclostridium difficile (strain 630) GN=CD02410 PE=4 SV=1	-	0.000250667	0.000251943	0.000389075	0.000275102		-0.634277		-0.500082
CD09990	Q18AJ9_PEPD6	ABC-type transport system,nitrate/sulfonate/taurine extracellular solute-binding protein OS=Peptoclostridium difficile (strain 630) GN=CD09990 PE=4 SV=1	-	6.06906e-05	4.20156e-05	6.05464e-05	4.27723e-05		0.00343173		-0.501364
CD07200	FOLD_PEPD6	Bifunctional protein FolD OS=Peptoclostridium difficile (strain 630) GN=folD PE=3 SV=2	-	1.19744e-05	3.35937e-05	3.70294e-05	2.6156e-05		-1.62872		-0.501532
CD00080	Q18C95_PEPD6	Uncharacterized protein OS=Peptoclostridium difficile (strain 630) GN=CD00080 PE=4 SV=1	-	0.000111114	0.000110435	7.69883e-05	5.42497e-05		0.529332		-0.505024
CD30310	Q184L9_PEPD6	Transcription antiterminator, PTS operon regulator OS=Peptoclostridium difficile (strain 630) GN=CD30310 PE=4 SV=1	-	3.19638e-05	4.57438e-05	3.19161e-05	2.24556e-05		0.00215212		-0.507213
CD12830	Y1283_PEPD6	UPF0297 protein CD12830 OS=Peptoclostridium difficile (strain 630) GN=CD12830 PE=3 SV=1	-			8.52361e-06	5.99644e-06		OFF		-0.507359	**
CD08680	Q18A58_PEPD6	Dna binding domain, excisionase family OS=Peptoclostridium difficile (strain 630) GN=CD08680 PE=4 SV=1	-	3.08434e-05	4.08457e-05	1.8233e-05	1.28083e-05		0.758405		-0.509482
CD11850	Q18B48_PEPD6	Putative diguanylate kinase signaling protein OS=Peptoclostridium difficile (strain 630) GN=CD11850 PE=4 SV=1	-	2.41956e-06	4.94238e-06	2.24519e-06	1.57708e-06		0.107912		-0.509575
CD12580	Q18BC0_PEPD6	Ribosome biogenesis GTPase A OS=Peptoclostridium difficile (strain 630) GN=CD12580 PE=3 SV=1	-	7.18e-05	3.3562e-05	6.36922e-05	4.47382e-05		0.172867		-0.50961	**
CD25830	Q182S3_PEPD6	Uncharacterized protein OS=Peptoclostridium difficile (strain 630) GN=CD25830 PE=4 SV=2	-	2.33366e-05	9.96991e-06	1.12706e-05	7.89378e-06		1.05004	**	-0.513769
CD16210	Q186H6_PEPD6	Putative mechanosensitive ion channel protein,MscS family OS=Peptoclostridium difficile (strain 630) GN=CD16210 PE=4 SV=1	-		4.29788e-06	9.93889e-06	6.95471e-06		OFF		-0.515095
CD00190	Q18CA1_PEPD6	Putative glycosyl transferase OS=Peptoclostridium difficile (strain 630) GN=CD00190 PE=4 SV=1	-	0.000101937	0.000164434	0.000121663	8.50876e-05		-0.255211		-0.515871
CD02860	Q18D29_PEPD6	PTS system, mannose/fructose/sorbose IIA component OS=Peptoclostridium difficile (strain 630) GN=CD02860 PE=4 SV=1	-	0.000809336	0.00050514	0.000520807	0.000364034		0.635991	**	-0.516676
CD27740	Q183K7_PEPD6	Putative glycosyl transferase, family 2 OS=Peptoclostridium difficile (strain 630) GN=CD27740 PE=4 SV=1	-	4.91336e-05	3.38389e-05	3.14295e-05	2.19446e-05		0.644593		-0.518249
CD01460	Q18CN9_PEPD6	Putative hydrolase OS=Peptoclostridium difficile (strain 630) GN=CD01460 PE=4 SV=1	-	3.17193e-05		4.19073e-05	2.92535e-05		-0.401839		-0.518592	**
CD35050	Q181A4_PEPD6	Putative twitching motility protein PilT OS=Peptoclostridium difficile (strain 630) GN=CD35050 PE=4 SV=1	-	4.73124e-05	6.12623e-05	4.35042e-05	3.03063e-05		0.121066		-0.521537
CD00900	Q18CH6_PEPD6	Protein translocase subunit SecY OS=Peptoclostridium difficile (strain 630) GN=SecY PE=3 SV=1	-	0.000105305	6.38841e-05	5.46601e-05	3.80491e-05		0.946012		-0.522628
CD27730	Q183K8_PEPD6	Putative glycosyl transferase, family 2 OS=Peptoclostridium difficile (strain 630) GN=CD27730 PE=4 SV=1	-	4.93657e-05	5.19016e-05	4.74199e-05	3.29153e-05		0.0580161		-0.526736
CD23700	Q185P1_PEPD6	Nicotinate-nucleotide pyrophosphorylase OS=Peptoclostridium difficile (strain 630) GN=nadC PE=3 SV=1	-	0.0004501	0.000340107	0.000401261	0.000278135		0.165704		-0.528758	**
CD07440	Q189U2_PEPD6	Putative MotA/TolQ/ExbB proton channel OS=Peptoclostridium difficile (strain 630) GN=CD07440 PE=3 SV=1	-	7.52888e-06		1.28643e-05	8.91304e-06		-0.772866		-0.529384
CD08800	Q18A73_PEPD6	Putative protease OS=Peptoclostridium difficile (strain 630) GN=CD08800 PE=4 SV=1	-	1.19317e-05	1.6404e-05	2.10133e-05	1.45332e-05		-0.816508	**	-0.531951
CD32410	Q17ZY6_PEPD6	Proline reductase (Selenocysteine) OS=Peptoclostridium difficile (strain 630) GN=prdB PE=4 SV=2	-	0.0116172	0.0111785	0.0202412	0.0139863		-0.80104	**	-0.533279	**
CD18180	ISPH_PEPD6	4-hydroxy-3-methylbut-2-enyl diphosphate reductase OS=Peptoclostridium difficile (strain 630) GN=ispH PE=3 SV=1	-	4.21659e-05	3.55547e-05	3.87684e-05	2.67386e-05		0.121193		-0.535957
CD21130	Q185Q2_PEPD6	Two-component sensor histidine kinase OS=Peptoclostridium difficile (strain 630) GN=CD21130 PE=4 SV=1	-	4.15972e-05	3.01373e-05	2.86826e-05	1.97708e-05		0.53631		-0.536803
CD31830	Q181U8_PEPD6	Putative peptidase, M20 family OS=Peptoclostridium difficile (strain 630) GN=CD31830 PE=4 SV=1	-	1.64567e-05		1.83803e-05	1.26535e-05		-0.159487		-0.538623
CD21070	Q188H4_PEPD6	Xanthine/uracil/thiamine/ascorbate permease family protein OS=Peptoclostridium difficile (strain 630) GN=CD21070 PE=4 SV=1	-	0.000115102	0.000101199	4.60778e-05	3.17184e-05		1.32077	**	-0.53875
CD26400	NRDR_PEPD6	Transcriptional repressor NrdR OS=Peptoclostridium difficile (strain 630) GN=nrdR PE=3 SV=1	-	4.1559e-05	4.19598e-05	3.33593e-05	2.29109e-05		0.317073		-0.542057
CD16530	Q186K7_PEPD6	Lipoprotein OS=Peptoclostridium difficile (strain 630) GN=CD16530 PE=1 SV=1	-	5.90387e-05	4.23612e-05	0.000166439	0.000114026		-1.49526	**	-0.545631	**
CD29800	Q184H1_PEPD6	Putative CRISPR-associated autoregulator DevR family protein protein OS=Peptoclostridium difficile (strain 630) GN=CD29800 PE=4 SV=1	-	2.73827e-05	4.65918e-05	6.64297e-05	4.54103e-05		-1.27856	**	-0.548808	**
CD34340	Q180T2_PEPD6	Cobyrinate a,c-diamide synthase OS=Peptoclostridium difficile (strain 630) GN=cobB PE=3 SV=2	-	0.000136908	0.000141892	0.000133395	9.11385e-05		0.0375017		-0.54957
CD26100	Q182U4_PEPD6	Tryptophan--tRNA ligase OS=Peptoclostridium difficile (strain 630) GN=trpS PE=3 SV=1	-	0.000116109	0.000176452	0.000233669	0.000159237		-1.00899	**	-0.553292
CD31750	Q181U1_PEPD6	Transcriptional regulator, SorC family OS=Peptoclostridium difficile (strain 630) GN=cggR PE=4 SV=1	-	9.2922e-05	0.000124099	0.000115884	7.89361e-05		-0.318594		-0.553929
CD06970	Q189P2_PEPD6	Putative regulator of K+ conductance OS=Peptoclostridium difficile (strain 630) GN=CD06970 PE=4 SV=1	-	4.21864e-05	2.27165e-05	2.22858e-05	1.51614e-05		0.920653		-0.555717
CD23720	NADA_PEPD6	Quinolinate synthase A OS=Peptoclostridium difficile (strain 630) GN=nadA PE=3 SV=1	-	0.00176851	0.00170557	0.00412664	0.00280732		-1.22244		-0.555771
CD27630	Q183J7_PEPD6	Putative lipoprotein OS=Peptoclostridium difficile (strain 630) GN=CD27630 PE=4 SV=1	-	1.32337e-05	1.44871e-05	1.19484e-05	8.09699e-06		0.1474		-0.561364	**
CD13830	Q18BQ4_PEPD6	Transcriptional regulator, GntR family OS=Peptoclostridium difficile (strain 630) GN=CD13830 PE=4 SV=1	-	0.000191297	0.000107452	0.000172103	0.000116475		0.15254		-0.563251	**
CD35610	Q181G2_PEPD6	Uncharacterized protein OS=Peptoclostridium difficile (strain 630) GN=CD35610 PE=4 SV=2	-	9.44602e-05	5.08204e-05	5.81709e-05	3.93531e-05		0.69941	**	-0.56382	**
CD22760	Q185E7_PEPD6	Sodium:alanine symporter OS=Peptoclostridium difficile (strain 630) GN=CD22760 PE=4 SV=1	-	8.34077e-05	4.70386e-05	0.000106625	7.18103e-05		-0.354296		-0.570285
CD10750	Q18AS9_PEPD6	Membrane complex biogenesis protein, btpa family OS=Peptoclostridium difficile (strain 630) GN=CD10750 PE=4 SV=1	-	1.56459e-05		2.30018e-05	1.54608e-05		-0.555967		-0.573135
CD11730	Q18B31_PEPD6	Putative FAD-linked oxidase OS=Peptoclostridium difficile (strain 630) GN=CD11730 PE=4 SV=1	-			1.2342e-05	8.29305e-06		OFF		-0.573604
CD00920	Q18CI4_PEPD6	Methionine aminopeptidase OS=Peptoclostridium difficile (strain 630) GN=map1 PE=3 SV=1	-	0.000147233	8.87554e-05	7.12403e-05	4.78251e-05		1.04733	**	-0.574924
CD25140	Q182J9_PEPD6	Threonine dehydratase II OS=Peptoclostridium difficile (strain 630) GN=tdcB PE=4 SV=1	-	0.000538809	0.000683124	0.000763275	0.000511819		-0.50243		-0.576569
CD10270	Q18AM5_PEPD6	ABC-type transport system,spermidine/putrescine solute-binding protein OS=Peptoclostridium difficile (strain 630) GN=potD PE=4 SV=1	-	0.000336129	0.00010964	9.79583e-05	6.56839e-05		1.77878		-0.576627
CD16400	Q186J7_PEPD6	Uncharacterized protein OS=Peptoclostridium difficile (strain 630) GN=CD16400 PE=4 SV=1	-	2.70063e-05	2.64735e-05	2.67109e-05	1.79022e-05		0.0158696		-0.57729
CD35250	Q181C3_PEPD6	ABC-type transport system, iron-family extracellular solute-binding protein OS=Peptoclostridium difficile (strain 630) GN=CD35250 PE=4 SV=1	-	0.000287014	0.000402616	0.000629646	0.000421709		-1.13342	**	-0.578293
CD15570	Q18C77_PEPD6	Putative peptidylprolyl isomerase OS=Peptoclostridium difficile (strain 630) GN=CD15570 PE=4 SV=1	-	5.20453e-05	2.99659e-05	4.66484e-05	3.12166e-05		0.157939		-0.579513
CD34200	Q180R8_PEPD6	Bifunctional uroporphyrinogen-III methyltransferase/uroporphyrinogen-III synthase OS=Peptoclostridium difficile (strain 630) GN=cobA + hemD PE=3 SV=2	-	0.000129671	8.59169e-05	0.000167218	0.000111823		-0.366878		-0.580518	**
CD02490	Q18CZ0_PEPD6	Flagellar motor switch protein FliG OS=Peptoclostridium difficile (strain 630) GN=fliG PE=4 SV=1	-	0.000236924	0.000288668	0.000299567	0.000200109		-0.338452		-0.582091
CD04510	Q188P2_PEPD6	Putative dioxygenase OS=Peptoclostridium difficile (strain 630) GN=CD04510 PE=4 SV=1	-	3.20106e-05	2.96095e-05	3.0101e-05	1.99601e-05		0.088735		-0.592694
CD08970	Q18A93_PEPD6	Uncharacterised protein OS=Peptoclostridium difficile (strain 630) GN=CD08970 PE=4 SV=1	-	2.16158e-05	2.57759e-05	2.89639e-05	1.91694e-05		-0.422172		-0.59545
CD21450	Q185T3_PEPD6	DNA mismatch repair protein OS=Peptoclostridium difficile (strain 630) GN=CD21450 PE=3 SV=1	-	1.83669e-05	1.35429e-05	1.75954e-05	1.16284e-05		0.061915		-0.597547	**
CD21620	Q185U9_PEPD6	Putative GCN5-related N-acetyltransferase-like protein OS=Peptoclostridium difficile (strain 630) GN=CD21620 PE=1 SV=1	-	1.1847e-05	2.51129e-05	3.08161e-05	2.0341e-05		-1.37916		-0.599294
CD35550	COAX_PEPD6	Type III pantothenate kinase OS=Peptoclostridium difficile (strain 630) GN=coaX PE=3 SV=1	-	0.000143316	8.55338e-05	0.000143788	9.48565e-05		-0.00473976		-0.60012	**
CD01280	FABZ_PEPD6	3-hydroxyacyl-[acyl-carrier-protein] dehydratase FabZ OS=Peptoclostridium difficile (strain 630) GN=fabZ PE=3 SV=1	-	0.000632641	0.000356783	0.000830384	0.000546371		-0.392392		-0.603898
CD21540	Q185U1_PEPD6	Putative ATP/GTP-binding protein OS=Peptoclostridium difficile (strain 630) GN=CD21540 PE=4 SV=1	-	9.65416e-05	6.05746e-05	7.21634e-05	4.73815e-05		0.419883		-0.606942
CD27750	Q183L4_PEPD6	Putative glycerophosphotransferase OS=Peptoclostridium difficile (strain 630) GN=CD27750 PE=4 SV=1	-	5.29284e-05	4.76695e-05	5.5425e-05	3.62901e-05		-0.0664946		-0.610963
CD23710	Q185P0_PEPD6	L-aspartate oxidase (Quinolinate synthetase B) OS=Peptoclostridium difficile (strain 630) GN=nadB PE=4 SV=1	-	0.00032545	0.000252587	0.000320482	0.000209438		0.022194		-0.613719	**
CD18150	Q187C5_PEPD6	Uncharacterized protein OS=Peptoclostridium difficile (strain 630) GN=CD18150 PE=4 SV=1	-	4.24793e-05	3.28644e-05	3.65863e-05	2.3897e-05		0.215458		-0.614475
CD32840	Q180C8_PEPD6	Serine protease, HrtA family OS=Peptoclostridium difficile (strain 630) GN=CD32840 PE=4 SV=1	-	0.000240035	0.000217987	0.000253653	0.00016548		-0.0796137		-0.616199
CD24980	Q182I4_PEPD6	D-alanyl-D-alanine carboxypeptidase (Putative sporulation-specific penicillin-binding protein) OS=Peptoclostridium difficile (strain 630) GN=dacF1 PE=3 SV=1	-	0.000120694	8.2275e-05	0.000156614	0.000101971		-0.375856		-0.619054	**
CD29960	Q184I8_PEPD6	Uncharacterized protein OS=Peptoclostridium difficile (strain 630) GN=CD29960 PE=4 SV=2	-		2.17138e-05	2.32299e-05	1.51143e-05		OFF		-0.620063
CD34980	Q180Z7_PEPD6	Stage V sporulation protein B OS=Peptoclostridium difficile (strain 630) GN=spoVB PE=4 SV=1	-	7.04782e-05	2.75547e-05	3.57129e-05	2.31964e-05		0.980731		-0.622545	**
CD07400	Q189T4_PEPD6	Putative pyridoxal phosphate-dependent aminotransferase OS=Peptoclostridium difficile (strain 630) GN=CD07400 PE=3 SV=1	-			0.000537165	0.000348182		OFF		-0.625522
CD35170	Q181B6_PEPD6	Transcriptional regulator, Purine operon repressor OS=Peptoclostridium difficile (strain 630) GN=purR PE=4 SV=1	-	0.000232272	0.000144895	0.000145477	9.42462e-05		0.67503		-0.62628	**
CD13390	Q18BK6_PEPD6	Aspartate aminotransferase (AspAT) (Transaminase A) OS=Peptoclostridium difficile (strain 630) GN=aspB PE=3 SV=1	-	0.00245678	0.00467038	0.00349996	0.00226329		-0.510567	**	-0.628916
CD11220	Q18AY1_PEPD6	Transcriptional regulator, RmlC-type OS=Peptoclostridium difficile (strain 630) GN=CD11220 PE=4 SV=1	-	3.03299e-05	1.98121e-05	2.92804e-05	1.88755e-05		0.0508071		-0.633423
CD10250	Q18AM7_PEPD6	ABC-type transport system,spermidine/putrescine permease OS=Peptoclostridium difficile (strain 630) GN=potB PE=3 SV=1	-	1.48597e-05	1.05732e-05	2.35103e-05	1.51367e-05		-0.661889	**	-0.635237	**
CD33730	Q180M0_PEPD6	Magnesium-transporting ATPase, P-type 1 Tn916-like, CTn7-Orf7 OS=Peptoclostridium difficile (strain 630) GN=mgtA PE=3 SV=1	-	0.00636545	0.00291525	0.00869292	0.00559677		-0.449579	**	-0.635246	**
CD23960	Q181Y2_PEPD6	Uncharacterised protein OS=Peptoclostridium difficile (strain 630) GN=CD23960 PE=4 SV=1	-	0.000222703	0.000108898	0.000116313	7.48476e-05		0.937106	**	-0.635986
CD25020	Q182I8_PEPD6	Putative pyridoxal phosphate-dependent transferase OS=Peptoclostridium difficile (strain 630) GN=CD25020 PE=3 SV=1	-	0.000112857	0.000240395	0.000161048	0.000103608		-0.512996		-0.636354
CD24830	Q182H0_PEPD6	Putative lipoprotein OS=Peptoclostridium difficile (strain 630) GN=CD24830 PE=4 SV=1	-	4.89883e-05	6.17352e-05	5.08636e-05	3.27134e-05		-0.0541962		-0.636753
CD08290	Q18A27_PEPD6	Putative metallo-beta-lactamase superfamily protein OS=Peptoclostridium difficile (strain 630) GN=CD08290 PE=4 SV=1	-	6.173e-05	4.978e-05	6.74329e-05	4.3365e-05		-0.12748		-0.636921	**
CD18250	Q187D4_PEPD6	O-acetylhomoserine sulfhydrylase OS=Peptoclostridium difficile (strain 630) GN=metY PE=3 SV=1	-	0.000279143	0.000190807	0.000447645	0.000285887		-0.68135	**	-0.646909
CD24490	Q182D6_PEPD6	Ribosomal RNA small subunit methyltransferase E OS=Peptoclostridium difficile (strain 630) GN=CD24490 PE=3 SV=1	-	3.6153e-05	2.83034e-05	2.60437e-05	1.66074e-05		0.473182	**	-0.649105	**
CD16010	THIE_PEPD6	Thiamine-phosphate synthase OS=Peptoclostridium difficile (strain 630) GN=thiE PE=3 SV=1	-	0.00018626	0.000163221	0.000310487	0.000197681		-0.737216	**	-0.651355	**
CD27050	Q183D9_PEPD6	Putative amidohydrolase OS=Peptoclostridium difficile (strain 630) GN=CD27050 PE=4 SV=1	-	0.000578118	0.000375933	0.000538425	0.000342101		0.102617		-0.654325
CD32220	Q17ZW7_PEPD6	L-serine dehydratase OS=Peptoclostridium difficile (strain 630) GN=sdaB PE=4 SV=1	-	0.000532268	0.00045523	0.00053637	0.000340143		-0.0110741		-0.657088
CD25800	RLMN_PEPD6	Probable dual-specificity RNA methyltransferase RlmN OS=Peptoclostridium difficile (strain 630) GN=rlmN PE=3 SV=1	-	8.45202e-05	3.90103e-05	4.43462e-05	2.80868e-05		0.930487		-0.658915
CD27820	Q183L7_PEPD6	Cell wall binding protein cwp7 OS=Peptoclostridium difficile (strain 630) GN=cwp7 PE=4 SV=1	-	0.000108442	0.000104749	0.000116275	7.32952e-05		-0.100629		-0.665756
CD32440	Q17ZY9_PEPD6	D-proline reductase proprotein prdA OS=Peptoclostridium difficile (strain 630) GN=prdA PE=4 SV=1	-	0.0143243	0.0124012	0.0254625	0.0160374		-0.829907	**	-0.666934	**
CD34820	Q180X9_PEPD6	Threonylcarbamoyl-AMP synthase OS=Peptoclostridium difficile (strain 630) GN=CD34820 PE=3 SV=2	-	0.000110316	7.06712e-05	9.15429e-05	5.72996e-05		0.269125	**	-0.675922
CD13340	Q18BJ9_PEPD6	Adenylosuccinate lyase OS=Peptoclostridium difficile (strain 630) GN=purB PE=3 SV=1	-	0.000757454	0.000504591	0.000560637	0.000350774		0.43409		-0.676525	**
CD18600	Q187H1_PEPD6	Putative conjugative transposon protein DUF1016 family, Tn1549-like, CTn5-Orf18 OS=Peptoclostridium difficile (strain 630) GN=CD18600 PE=4 SV=1	-	2.92159e-05	3.6175e-05	3.54532e-05	2.21508e-05		-0.279163		-0.678557
CD28190	Q183Q8_PEPD6	Putative amino acid racemase OS=Peptoclostridium difficile (strain 630) GN=CD28190 PE=4 SV=1	-	4.92744e-05	6.34544e-05	6.92358e-05	4.32278e-05		-0.49068		-0.679557
CD12630	Q18BC8_PEPD6	Putative FMN-dependent dehydrogenase OS=Peptoclostridium difficile (strain 630) GN=CD12630 PE=4 SV=1	-	0.000269584	0.000268711	0.000337146	0.000209974		-0.322639		-0.683162
CD30440	Q184N2_PEPD6	Transcriptional regulator, RpiR family OS=Peptoclostridium difficile (strain 630) GN=CD30440 PE=4 SV=1	-	1.03382e-05	9.44773e-06	1.29494e-05	8.02829e-06		-0.324899		-0.689716
CD02200	Q18CV9_PEPD6	Amidophosphoribosyltransferase OS=Peptoclostridium difficile (strain 630) GN=purF PE=3 SV=1	-	0.000772614	0.000560387	0.000724277	0.000448488		0.0932067		-0.69147	**
CD35540	Q181F5_PEPD6	tRNA-dihydrouridine synthase OS=Peptoclostridium difficile (strain 630) GN=dusB PE=3 SV=1	-	3.05897e-05	9.61845e-06	3.33446e-05	2.0627e-05		-0.124409		-0.692921
CD07510	Q189U6_PEPD6	ABC-type transport system, aminoacid-family permease OS=Peptoclostridium difficile (strain 630) GN=CD07510 PE=3 SV=1	-	1.01677e-05	8.25391e-06	1.8833e-05	1.16319e-05		-0.889268		-0.695184	**
CD10430	Q18AP3_PEPD6	Nuclease SbcCD subunit C OS=Peptoclostridium difficile (strain 630) GN=sbcC PE=4 SV=1	-	2.83791e-05	2.58259e-05	2.13753e-05	1.31023e-05		0.408884		-0.706126
CD00801	RL29_PEPD6	50S ribosomal protein L29 OS=Peptoclostridium difficile (strain 630) GN=rpmC PE=3 SV=1	-	0.0010345	0.0013789	0.00115157	0.00070563		-0.154668		-0.706619
CD21650	Q185V4_PEPD6	Transcriptional regulator, HTH-type OS=Peptoclostridium difficile (strain 630) GN=CD21650 PE=4 SV=1	-	3.88003e-05	2.43261e-05	3.81635e-05	2.33364e-05		0.0238753		-0.709611
CD13460	Q18BK7_PEPD6	Uncharacterized protein OS=Peptoclostridium difficile (strain 630) GN=CD13460 PE=4 SV=1	-	3.92622e-06	4.15339e-06	5.80877e-06	3.54632e-06		-0.565092		-0.71191
CD34210	HEM3_PEPD6	Porphobilinogen deaminase OS=Peptoclostridium difficile (strain 630) GN=hemC PE=3 SV=1	-	6.47298e-05	2.24019e-05	7.89187e-05	4.81725e-05		-0.285938		-0.712158
CD28020	Q183P1_PEPD6	Queuine tRNA-ribosyltransferase OS=Peptoclostridium difficile (strain 630) GN=tgt PE=3 SV=2	-	0.000111632	7.84938e-05	0.000126769	7.72675e-05		-0.183449		-0.714268
CD00200	Q18CA5_PEPD6	Uncharacterized protein OS=Peptoclostridium difficile (strain 630) GN=CD00200 PE=4 SV=1	-		1.02845e-05	1.57436e-05	9.56666e-06		OFF		-0.71868	**
CD11370	Q18AZ5_PEPD6	Electron transport complex subunit C OS=Peptoclostridium difficile (strain 630) GN=rnfC PE=3 SV=1	-	0.000956359	0.000436596	0.00134734	0.000814983		-0.494486	**	-0.725268	**
CD21390	EFTS_PEPD6	Elongation factor Ts OS=Peptoclostridium difficile (strain 630) GN=tsf PE=3 SV=1	-	0.00405549	0.00314971	0.00375252	0.00226904		0.112016		-0.725778
CD02560	Q18CZ2_PEPD6	Flagellar motor rotation protein MotA OS=Peptoclostridium difficile (strain 630) GN=motA PE=4 SV=1	-	8.27307e-05	7.77127e-05	0.000108085	6.5274e-05		-0.385675		-0.727588
CD29560	VATA_PEPD6	V-type ATP synthase alpha chain OS=Peptoclostridium difficile (strain 630) GN=atpA PE=3 SV=1	-	5.86696e-05	4.28062e-05	0.000113475	6.83222e-05		-0.951684	**	-0.731941	**
CD09980	Q18AK0_PEPD6	UPF0313 protein CD09980 OS=Peptoclostridium difficile (strain 630) GN=CD09980 PE=3 SV=1	-	4.37007e-05		3.70951e-05	2.2327e-05		0.23643		-0.732438
CD05470	Q188Z2_PEPD6	Transcriptional regulator, beta-lactams repressor OS=Peptoclostridium difficile (strain 630) GN=CD05470 PE=4 SV=1	-	2.06272e-05	2.02027e-05	2.43355e-05	1.46282e-05		-0.238509		-0.734311	**
CD26920	Q183C6_PEPD6	Putative threonine-phosphate decarboxylase OS=Peptoclostridium difficile (strain 630) GN=CD26920 PE=4 SV=1	-	0.000113183	0.0002285	0.000189952	0.000113932		-0.746981		-0.737457
CD07960	Q189Z4_PEPD6	Transcriptional regulator, LacI family OS=Peptoclostridium difficile (strain 630) GN=CD07960 PE=4 SV=1	-	1.74822e-05	2.12763e-05	2.72077e-05	1.63016e-05		-0.638123		-0.739004
CD10460	Q18AP6_PEPD6	Peptidase T OS=Peptoclostridium difficile (strain 630) GN=pepT PE=3 SV=1	-	8.25574e-05	5.92142e-05	0.000232318	0.000138978		-1.49263	**	-0.741241	**
CD25160	Q182K2_PEPD6	L-asparaginase OS=Peptoclostridium difficile (strain 630) GN=ansB PE=4 SV=1	-	3.38957e-05	1.70624e-05	3.64312e-05	2.17829e-05		-0.104069		-0.741976
CD12990	Q18BG0_PEPD6	Transcriptional regulator, MarR family OS=Peptoclostridium difficile (strain 630) GN=CD12990 PE=4 SV=1	-			1.78928e-05	1.06886e-05		OFF		-0.743303
CD08790	Q18A74_PEPD6	Putative carbohydrate kinase OS=Peptoclostridium difficile (strain 630) GN=CD08790 PE=3 SV=1	-	0.000100473	4.52406e-05	3.14325e-05	1.87502e-05		1.67648		-0.745349
CD02920	Q18D32_PEPD6	Transcriptional regulator, HTH-type OS=Peptoclostridium difficile (strain 630) GN=CD02920 PE=4 SV=1	-	8.85272e-06		1.83642e-05	1.09473e-05		-1.0527		-0.746325
CD32870	Q180D1_PEPD6	Putative oxidoreductase, FAD dependent OS=Peptoclostridium difficile (strain 630) GN=CD32870 PE=4 SV=1	-	3.35831e-05	9.69134e-06	3.09811e-05	1.84644e-05		0.116348		-0.746644
CD35160	SP5G_PEPD6	Putative septation protein SpoVG OS=Peptoclostridium difficile (strain 630) GN=spoVG PE=3 SV=1	-	5.99071e-05	9.99263e-05	0.000139977	8.31631e-05		-1.22439	**	-0.751174	**
CD26950	Q183C9_PEPD6	Aspartate--ammonia ligase OS=Peptoclostridium difficile (strain 630) GN=asnA PE=3 SV=2	-	0.000614716	0.000581728	0.000722436	0.000429078		-0.232951		-0.751631
CD20040	Q187W6_PEPD6	Transcriptional regulator, MarR family OS=Peptoclostridium difficile (strain 630) GN=effR PE=4 SV=1	-	0.000168457	6.11166e-05	1.93878e-05	1.15138e-05		3.11915	**	-0.751793
CD24870	Q182H4_PEPD6	PTS system, fructose-like IIB component OS=Peptoclostridium difficile (strain 630) GN=CD24870 PE=4 SV=1	-			1.89027e-05	1.12184e-05		OFF		-0.752722
CD24460	RS21_PEPD6	30S ribosomal protein S21 OS=Peptoclostridium difficile (strain 630) GN=rpsU PE=3 SV=1	-	0.000689227	0.000163343	0.000393643	0.000233509		0.808091	**	-0.75341	**
CD00490	SYP1_PEPD6	Proline--tRNA ligase 1 OS=Peptoclostridium difficile (strain 630) GN=proS1 PE=3 SV=1	-	0.000125477	6.80033e-05	0.000347804	0.000206263		-1.47085	**	-0.75379
CD25410	Q182M8_PEPD6	Sodium:glutamate/aspartate symporter family OS=Peptoclostridium difficile (strain 630) GN=CD25410 PE=4 SV=1	-	0.000164943	0.000124818	9.52631e-05	5.64666e-05		0.791977		-0.75452
CD32210	Q17ZW3_PEPD6	Putative peptidase, M20D family OS=Peptoclostridium difficile (strain 630) GN=CD32210 PE=4 SV=1	-	0.000261073	0.00204044	0.0031584	0.00187183		-3.59667		-0.754746
CD02210	Q18CW2_PEPD6	Phosphoribosylformylglycinamidine cyclo-ligase OS=Peptoclostridium difficile (strain 630) GN=purG PE=3 SV=1	-	0.000435008	0.000828361	0.0007012	0.000414717		-0.688785	**	-0.7577	**
CD04870	Q188T2_PEPD6	Putative carbon-nitrogen hydrolase OS=Peptoclostridium difficile (strain 630) GN=CD04870 PE=4 SV=1	-	6.79741e-05	7.43245e-05	0.000140173	8.27106e-05		-1.04415	**	-0.76106	**
CD26110	Q182U5_PEPD6	5'-methylthioadenosine/S-adenosylhomocysteine nucleosidase 1 OS=Peptoclostridium difficile (strain 630) GN=mtnN PE=4 SV=1	-	4.24916e-05	4.10333e-05	7.39471e-05	4.35459e-05		-0.799317	**	-0.763958
CD32900	Q180D4_PEPD6	Uncharacterized protein OS=Peptoclostridium difficile (strain 630) GN=CD32900 PE=4 SV=1	-	0.00018569	0.000104255	0.000160789	9.42993e-05		0.20773		-0.769846	**
CD35210	Q181C0_PEPD6	Putative peptidase T, M20B family OS=Peptoclostridium difficile (strain 630) GN=CD35210 PE=4 SV=1	-	0.000299953	0.000479561	0.000381871	0.000223293		-0.348351		-0.774147
CD14510	Q18BX1_PEPD6	Dihydroneopterin aldolase OS=Peptoclostridium difficile (strain 630) GN=folB PE=4 SV=1	-	0.000100232	7.2169e-05	6.96306e-05	4.03466e-05		0.525546	**	-0.787274	**
CD24910	Q182H9_PEPD6	Mannose-6-phosphate isomerase (Phosphomannose isomerase) (PMI) (Phosphohexomutase) OS=Peptoclostridium difficile (strain 630) GN=pmi PE=3 SV=1	-	0.000121233	0.000108169	0.000121064	7.01463e-05		0.00201158		-0.787326
CD08930	Q18A87_PEPD6	Putative iron-dependent hydrogenase OS=Peptoclostridium difficile (strain 630) GN=CD08930 PE=4 SV=2	-	0.000238521	0.00013026	0.000414925	0.000240302		-0.798738	**	-0.788003	**
CD01120	Q18CK4_PEPD6	Phosphate butyryltransferase OS=Peptoclostridium difficile (strain 630) GN=ptb PE=4 SV=1	-	0.00317849	0.00325948	0.00435399	0.0025215		-0.453998	**	-0.788057	**
CD32430	Q17ZY5_PEPD6	Uncharacterized protein OS=Peptoclostridium difficile (strain 630) GN=CD32430 PE=4 SV=1	-	0.000218514	8.47604e-05	0.000286867	0.000165954		-0.392658		-0.789598
CD22880	Q185F9_PEPD6	Two-component sensor histidine kinase OS=Peptoclostridium difficile (strain 630) GN=CD22880 PE=4 SV=1	-	9.4033e-06	3.62506e-06	6.19561e-06	3.58107e-06		0.601921		-0.790855
CD01420	Q18CN1_PEPD6	Putative RNA-binding protein OS=Peptoclostridium difficile (strain 630) GN=CD01420 PE=4 SV=1	-	0.000326462	0.000607108	0.000946119	0.000544987		-1.53511	**	-0.795801	**
CD28530	Q183T6_PEPD6	D-alanine--poly(phosphoribitol) ligase subunit 1 OS=Peptoclostridium difficile (strain 630) GN=dltA PE=3 SV=1	-	0.000300006	0.000351335	0.000685894	0.000393123		-1.193		-0.803004
CD02330	FLIW_PEPD6	Flagellar assembly factor FliW OS=Peptoclostridium difficile (strain 630) GN=fliW PE=3 SV=1	-	0.000320712	0.000386786	0.00028813	0.000164518		0.154556		-0.808473	**
CD17220	Q186T0_PEPD6	Putative transcriptional regulator OS=Peptoclostridium difficile (strain 630) GN=CD17220 PE=4 SV=1	-	1.63527e-05	8.09485e-06	7.69939e-06	4.39603e-06		1.08672	**	-0.808544
CD08490	Q18A44_PEPD6	Putative glutamate carboxypeptidase OS=Peptoclostridium difficile (strain 630) GN=CD08490 PE=4 SV=1	-	8.56323e-05	3.86669e-05	9.98568e-05	5.6853e-05		-0.221705		-0.812624	**
CD07300	Q189S3_PEPD6	Putative iron-sulfur protein OS=Peptoclostridium difficile (strain 630) GN=CD07300 PE=4 SV=1	-	2.68599e-05	3.41665e-05	4.37152e-05	2.48472e-05		-0.702684	**	-0.815051	**
CD17170	Q186S6_PEPD6	Uncharacterised protein OS=Peptoclostridium difficile (strain 630) GN=CD17170 PE=4 SV=1	-	0.0001101	5.91277e-05	0.000104911	5.93919e-05		0.0696431		-0.820835
CD21790	Q185W8_PEPD6	Putative anaerobic dehydrogenase OS=Peptoclostridium difficile (strain 630) GN=CD21790 PE=4 SV=1	-	2.81111e-05		4.14099e-05	2.34165e-05		-0.558837		-0.822449	**
CD27060	Q183E1_PEPD6	Uncharacterized protein OS=Peptoclostridium difficile (strain 630) GN=CD27060 PE=4 SV=1	-		1.31022e-05	8.43909e-06	4.755e-06		OFF		-0.82764
CD16600	Y1660_PEPD6	UPF0345 protein CD16600 OS=Peptoclostridium difficile (strain 630) GN=CD16600 PE=3 SV=1	-	1.58317e-05		4.65533e-05	2.61439e-05		-1.55607	**	-0.832409	**
CD34550	Q180V3_PEPD6	Putative carboxy-terminal protease OS=Peptoclostridium difficile (strain 630) GN=CD34550 PE=3 SV=1	-	7.54718e-05	4.16198e-05	8.60045e-05	4.82155e-05		-0.188476		-0.834917
CD29990	Q184J0_PEPD6	ABC-type transport system, iron-family extracellular solute-binding protein OS=Peptoclostridium difficile (strain 630) GN=CD29990 PE=4 SV=1	-	0.000298428	0.00026741	0.000213418	0.000118684		0.483701		-0.846556
CD06980	Q189P1_PEPD6	Putative tRNA/rRNA methyltransferase, SpoU OS=Peptoclostridium difficile (strain 630) GN=CD06980 PE=4 SV=1	-	4.31234e-05	1.96724e-05	3.63432e-05	2.0163e-05		0.246786		-0.849974	**
CD26820	Q183B6_PEPD6	Pyruvate-flavodoxin oxidoreductase OS=Peptoclostridium difficile (strain 630) GN=pfo PE=3 SV=1	-	0.010153	0.0050833	0.0189123	0.0104823		-0.897419	**	-0.851375	**
CD13400	Q18BK5_PEPD6	Galactose-1-phosphate uridylyltransferase OS=Peptoclostridium difficile (strain 630) GN=CD13400 PE=3 SV=1	-	1.73846e-05	1.79621e-05	1.86637e-05	1.03112e-05		-0.102421		-0.856018
CD31110	Q184V0_PEPD6	Uncharacterized protein OS=Peptoclostridium difficile (strain 630) GN=CD31110 PE=4 SV=1	-	1.11566e-05		1.07094e-05	5.89365e-06		0.0590263		-0.861644
CD23380	Q185L3_PEPD6	4-hydroxybutyrate dehydrogenase (4-hydroxybutanoate:NAD+ oxidoreductase) OS=Peptoclostridium difficile (strain 630) GN=4hbD PE=4 SV=1	-	2.42542e-05	1.80778e-05	5.07418e-05	2.7818e-05		-1.06494	**	-0.867158
CD27410	Q183H7_PEPD6	Coproporphyrinogen III oxidase OS=Peptoclostridium difficile (strain 630) GN=hemZ PE=4 SV=1	-	2.86138e-05		1.70815e-05	9.36421e-06		0.744279		-0.867203
CD01140	Q18CK2_PEPD6	Putative atp/gtp-binding protein OS=Peptoclostridium difficile (strain 630) GN=CD01140 PE=4 SV=1	-	0.000207245	0.000153758	0.000319868	0.000174048		-0.626145	**	-0.877992	**
CD17300	Q186T9_PEPD6	Putative ATP-binding protein OS=Peptoclostridium difficile (strain 630) GN=CD17300 PE=4 SV=1	-	0.000408652	0.000204911	0.00067759	0.0003651		-0.72954	**	-0.892122	**
CD02900	Q18D34_PEPD6	Uncharacterized protein OS=Peptoclostridium difficile (strain 630) GN=CD02900 PE=4 SV=1	-	0.00714874	0.0020658	0.00847715	0.00454941		-0.24589		-0.897901	**
CD00370	Q18CC3_PEPD6	Acetoin dehydrogenase E1 component (TPP-dependent beta subunit) OS=Peptoclostridium difficile (strain 630) GN=acoB PE=4 SV=1	-			1.25904e-05	6.69996e-06		OFF		-0.910104
CD00640	RL7_PEPD6	50S ribosomal protein L7/L12 OS=Peptoclostridium difficile (strain 630) GN=rplL PE=3 SV=1	-	0.00326626	0.00320157	0.00201176	0.00106009		0.699182		-0.924273	**
CD23470	Q185M2_PEPD6	Putative Xaa-Pro dipeptidase OS=Peptoclostridium difficile (strain 630) GN=proP PE=4 SV=1	-	5.26495e-05	0.000100402	0.000125302	6.6006e-05		-1.25091	**	-0.924735
CD34580	Q180V6_PEPD6	Putative membrane protein OS=Peptoclostridium difficile (strain 630) GN=CD34580 PE=4 SV=1	-	0.000203385	0.000219214	0.000337854	0.000177762		-0.732187	**	-0.926448	**
CD21000	Q188G9_PEPD6	Xanthine dehydrogenase iron-sulfur binding subunit XdhC3 OS=Peptoclostridium difficile (strain 630) GN=XdhC3 PE=4 SV=1	-	4.69022e-05		5.08076e-05	2.67119e-05		-0.115387		-0.927561
CD15070	Q18C25_PEPD6	Putative thioredoxin OS=Peptoclostridium difficile (strain 630) GN=CD15070 PE=4 SV=1	-	2.00572e-05	9.66935e-06	1.82902e-05	9.60771e-06		0.133049		-0.928808
CD27810	Q183L8_PEPD6	Putative lipid II flippase MurJ OS=Peptoclostridium difficile (strain 630) GN=mviN PE=3 SV=1	-	4.90977e-05	2.84053e-05	2.85314e-05	1.49634e-05		0.783104		-0.931115
CD07060	Q189Q2_PEPD6	4fe-4s binding domain protein OS=Peptoclostridium difficile (strain 630) GN=CD07060 PE=4 SV=1	-	0.000154568	6.51584e-05	0.000201515	0.000104663		-0.382643		-0.945127	**
CD07290	GCSH_PEPD6	Glycine cleavage system H protein OS=Peptoclostridium difficile (strain 630) GN=gcvH PE=3 SV=1	-			1.56336e-05	8.11125e-06		OFF		-0.946658
CD13940	Q18BR4_PEPD6	Putative NAD(P)-binding oxidoreductase,GFO/IDH/MOCA family OS=Peptoclostridium difficile (strain 630) GN=CD13940 PE=4 SV=1	-	5.23584e-05	3.26461e-05	9.70688e-05	5.02029e-05		-0.890587	**	-0.951238	**
CD21940	Q185Y3_PEPD6	Putative ROK protein OS=Peptoclostridium difficile (strain 630) GN=CD21940 PE=4 SV=1	-	2.24315e-05	5.93532e-05	1.06409e-05	5.48374e-06		1.0759		-0.956391	**
CD26140	Q182U8_PEPD6	Uncharacterised protein, DegV family OS=Peptoclostridium difficile (strain 630) GN=CD26140 PE=4 SV=1	-	2.94354e-05		4.20482e-05	2.16585e-05		-0.514492		-0.95711
CD32470	Q17ZZ2_PEPD6	Putative electron transfer protein OS=Peptoclostridium difficile (strain 630) GN=prdC PE=4 SV=1	-	0.0040629	0.00324836	0.00756571	0.00389416		-0.896966	**	-0.958163	**
CD16020	Q186F7_PEPD6	PTS system, lactose/cellobiose-family IIB component OS=Peptoclostridium difficile (strain 630) GN=CD16020 PE=4 SV=1	-	2.62921e-05	3.5573e-05	6.08717e-05	3.12765e-05		-1.21114	**	-0.96069
CD16230	Q186H7_PEPD6	Putative oxidoreductase OS=Peptoclostridium difficile (strain 630) GN=CD16230 PE=4 SV=1	-	4.96492e-05	6.65096e-05	0.000110721	5.66277e-05		-1.15709	**	-0.967349	**
CD16630	Q186L8_PEPD6	Guanine deaminase (Guanase) (Guanine aminase) (Guanine aminohydrolase) (GAH) OS=Peptoclostridium difficile (strain 630) GN=guaD PE=4 SV=1	-	8.36466e-05	2.4066e-05	0.000152966	7.79531e-05		-0.870828		-0.97253	**
CD32310	Q17ZX6_PEPD6	Hypoxanthine phosphoribosyltransferase OS=Peptoclostridium difficile (strain 630) GN=hpt1 PE=4 SV=1	-	8.41796e-05	5.58546e-05	0.000138687	7.04506e-05		-0.720294	**	-0.977154	**
CD13250	Q18BI8_PEPD6	Putative tRNA 2-selenouridine synthase,selenophosphate-dependent Rhodanese-like domain protein OS=Peptoclostridium difficile (strain 630) GN=CD13250 PE=1 SV=1	-	5.34885e-05	8.01319e-05	5.68481e-05	2.88565e-05		-0.0878832		-0.978215	**
CD29550	VATB_PEPD6	V-type ATP synthase beta chain OS=Peptoclostridium difficile (strain 630) GN=atpB PE=3 SV=1	-	5.85092e-05		0.000147912	7.4995e-05		-1.338		-0.979872
CD28260	Q183Q9_PEPD6	Putative oxidoreductase (Fad-binding domain) OS=Peptoclostridium difficile (strain 630) GN=CD28260 PE=4 SV=1	-	1.4163e-05	5.68374e-06	1.50551e-05	7.54278e-06		-0.0881233		-0.997084
CD32290	Q17ZX4_PEPD6	4-hydroxy-tetrahydrodipicolinate reductase OS=Peptoclostridium difficile (strain 630) GN=dapB PE=3 SV=1	-	3.52346e-05	7.2076e-05	7.04376e-05	3.5254e-05		-0.999354		-0.998558	**
CD24920	Q182H8_PEPD6	Two-component sensor histidine kinase,sporulation-associated spo0A OS=Peptoclostridium difficile (strain 630) GN=CD24920 PE=4 SV=1	-	2.53821e-06	3.2465e-06	9.11369e-06	4.55384e-06		-1.84422	**	-1.00095	**
CD35940	Q181J8_PEPD6	Uncharacterized protein OS=Peptoclostridium difficile (strain 630) GN=CD35940 PE=4 SV=1	-	2.36368e-05	1.58283e-05	2.01518e-05	1.00514e-05		0.230127		-1.00351
CD17930	Q187A1_PEPD6	Putative oxidoreductase OS=Peptoclostridium difficile (strain 630) GN=CD17930 PE=4 SV=1	-	0.00356235	0.00128262	0.00386015	0.0019017		-0.115827		-1.02137	**
CD01270	Q18CM0_PEPD6	Rod shape-determining protein MreB OS=Peptoclostridium difficile (strain 630) GN=mreB1 PE=4 SV=1	-	8.71626e-05	0.000125447	0.000192635	9.38905e-05		-1.14409	**	-1.03682	**
CD17120	Q186S1_PEPD6	Molybdenum cofactor biosynthesis protein MoaB OS=Peptoclostridium difficile (strain 630) GN=moaB PE=4 SV=1	-	1.02706e-05	1.84347e-05	2.84445e-05	1.3778e-05		-1.46962		-1.04579
CD01130	Q18CK3_PEPD6	Probable butyrate kinase OS=Peptoclostridium difficile (strain 630) GN=buk PE=3 SV=1	-	0.0036826	0.00406644	0.00551871	0.00266614		-0.583608	**	-1.04958	**
CD25450	Q182N2_PEPD6	Cellulose synthase catalytic subunit (UDP-forming) OS=Peptoclostridium difficile (strain 630) GN=bcsA PE=4 SV=1	-	2.55689e-05	8.07738e-06	1.07118e-05	5.14497e-06		1.25519		-1.05796
CD28040	QUEA_PEPD6	S-adenosylmethionine:tRNA ribosyltransferase-isomerase OS=Peptoclostridium difficile (strain 630) GN=queA PE=3 SV=1	-	7.22654e-05	4.1209e-05	5.51431e-05	2.61185e-05		0.390127		-1.07811	**
CD14810	Q18C00_PEPD6	Putative tryptophan RNA-binding attenuation protein OS=Peptoclostridium difficile (strain 630) GN=CD14810 PE=4 SV=2	-			4.52787e-05	2.10347e-05		OFF		-1.10606	**
CD23900	Q181X6_PEPD6	Transcriptional regulator, beta-lactams repressor OS=Peptoclostridium difficile (strain 630) GN=CD23900 PE=4 SV=1	-	0.000118596	0.000141998	3.51866e-05	1.63281e-05		1.75295		-1.10767	**
CD33150	Q180F9_PEPD6	Putative oxidoreductase, Fe-S subunit OS=Peptoclostridium difficile (strain 630) GN=hydN2 PE=4 SV=1	-	4.5691e-06		8.27663e-06	3.77465e-06		-0.857134		-1.1327
CD35960	Q181J6_PEPD6	Putative homocysteine S-methyltransferase OS=Peptoclostridium difficile (strain 630) GN=CD35960 PE=4 SV=1	-	0.000247713	9.87226e-05	0.00037794	0.00016995		-0.60949	**	-1.15304	**
CD15360	Q18C55_PEPD6	Ferredoxin--NADP(+) reductase subunit alpha OS=Peptoclostridium difficile (strain 630) GN=CD15360 PE=4 SV=1	-	0.000311762	0.000153006	0.000510914	0.000224959		-0.712633	**	-1.18342	**
CD13020	Q18BG5_PEPD6	Putative MazG-like pyrophosphohydrolase OS=Peptoclostridium difficile (strain 630) GN=CD13020 PE=4 SV=1	-	1.04546e-05	2.54829e-05	3.05519e-05	1.33731e-05		-1.54713		-1.19193
CD11380	Q18B00_PEPD6	Electron transport complex subunit D OS=Peptoclostridium difficile (strain 630) GN=rnfD PE=3 SV=1	-	0.000243832	0.000174691	0.000375962	0.000164327		-0.624702	**	-1.19402	**
CD13850	Q18BQ2_PEPD6	Probable transporter OS=Peptoclostridium difficile (strain 630) GN=CD13850 PE=4 SV=1	-	5.07288e-05	2.17683e-05	3.61246e-05	1.57151e-05		0.489822		-1.20083
CD29810	Q184H0_PEPD6	Putative CRISPR-associated protein, CXXC-CXXC OS=Peptoclostridium difficile (strain 630) GN=CD29810 PE=4 SV=1	-		1.04401e-05	2.6296e-05	1.14298e-05		OFF		-1.20204	**
CD15550	Q18C75_PEPD6	Putative amino acid permease OS=Peptoclostridium difficile (strain 630) GN=CD15550 PE=4 SV=2	-	7.23341e-05	4.65596e-05	7.40242e-05	3.21553e-05		-0.0333218		-1.20294
#N/A	RUVX_PEPD6	Putative Holliday junction resolvase OS=Peptoclostridium difficile (strain 630) GN=CD12850 PE=3 SV=1	-	4.95209e-05	2.62071e-05	5.38988e-05	2.32244e-05		-0.122214		-1.21461	**
CD14890	METN_PEPD6	Methionine import ATP-binding protein MetN OS=Peptoclostridium difficile (strain 630) GN=metN PE=3 SV=1	-	0.000113391	8.26046e-05	0.000145471	6.2405e-05		-0.359422		-1.221	**
CD32650	Q180B0_PEPD6	Two-component response regulator OS=Peptoclostridium difficile (strain 630) GN=CD32650 PE=1 SV=1	-			2.67043e-05	1.14475e-05		OFF		-1.22204
CD08650	Q18A61_PEPD6	Putative ADP-ribose binding protein OS=Peptoclostridium difficile (strain 630) GN=CD08650 PE=4 SV=1	-	2.63741e-05	7.04084e-05	9.59815e-05	4.10825e-05		-1.86364	**	-1.22423	**
CD12080	Q18B73_PEPD6	Putative RNA-binding S4-domain protein OS=Peptoclostridium difficile (strain 630) GN=CD12080 PE=4 SV=1	-	1.59832e-05		2.67353e-05	1.14061e-05		-0.742187		-1.22894	**
CD16540	Q186L0_PEPD6	Putative lipoate-protein ligase OS=Peptoclostridium difficile (strain 630) GN=lplA PE=4 SV=1	-	5.28029e-05	0.000104888	0.000141747	5.96403e-05		-1.42463	**	-1.24896	**
CD27490	Q183I6_PEPD6	Putative radical SAM-family protein OS=Peptoclostridium difficile (strain 630) GN=CD27490 PE=4 SV=1	-	0.000202699	2.99247e-05	0.000128319	5.39216e-05		0.659606	**	-1.2508	**
CD07230	Q189R5_PEPD6	Dihydrolipoyl dehydrogenase OS=Peptoclostridium difficile (strain 630) GN=CD07230 PE=3 SV=1	-		6.44778e-06	2.10447e-05	8.73785e-06		OFF		-1.26811
CD34190	Q180R7_PEPD6	Delta-aminolevulinic acid dehydratase OS=Peptoclostridium difficile (strain 630) GN=hemB PE=3 SV=2	-	0.000683903	0.000505659	0.00135849	0.000563593		-0.990135	**	-1.26927	**
CD07500	Q189U7_PEPD6	ABC-type transport system, aminoacid-family extracellular solute-binding protein OS=Peptoclostridium difficile (strain 630) GN=CD07500 PE=4 SV=1	-	9.60996e-05	4.27649e-05	0.00010386	4.29833e-05		-0.112039		-1.27279	**
CD21300	DXR_PEPD6	1-deoxy-D-xylulose 5-phosphate reductoisomerase OS=Peptoclostridium difficile (strain 630) GN=dxr PE=3 SV=1	-	0.000220479	0.000344012	0.000243257	0.000100276		-0.141842		-1.27851
CD11780	PLSX_PEPD6	Phosphate acyltransferase OS=Peptoclostridium difficile (strain 630) GN=plsX PE=3 SV=1	-	0.000250895	0.00020214	0.000293005	0.000119948		-0.223843		-1.28852	**
CD13330	Q18BK0_PEPD6	Putative phage tyrosine recombinase OS=Peptoclostridium difficile (strain 630) GN=CD13330 PE=4 SV=1	-	0.000106388	1.5655e-05	0.000153992	6.17945e-05		-0.533519		-1.3173
CD18100	Q187C2_PEPD6	Transcriptional regulator, beta-lactams repressor OS=Peptoclostridium difficile (strain 630) GN=CD18100 PE=4 SV=1	-	9.14775e-05	0.00016215	5.33726e-05	2.10416e-05		0.777319		-1.34285	**
CD04400	Q188M7_PEPD6	Putative cell wall binding protein cwp27 OS=Peptoclostridium difficile (strain 630) GN=cwp27 PE=4 SV=1	-	2.54322e-05	5.87891e-05	0.000133009	5.21687e-05		-2.38679	**	-1.35027	**
CD11420	Q18B01_PEPD6	Electron transport complex protein OS=Peptoclostridium difficile (strain 630) GN=rnfB PE=4 SV=1	-	0.000804178	0.000365772	0.00150632	0.000578464		-0.905437	**	-1.38072	**
CD06060	X1W3M4_PEPD6	Chloride ion channel protein OS=Peptoclostridium difficile (strain 630) GN=CD06060 PE=4 SV=1	-		1.88877e-06	2.81057e-06	1.0697e-06		OFF		-1.39366	**
CD26120	Q182U7_PEPD6	Putative amino acid permease OS=Peptoclostridium difficile (strain 630) GN=CD26120 PE=4 SV=1	-	0.000227351	0.000348789	0.000269146	0.000101953		-0.243465		-1.40048	**
CD12320	Q18B93_PEPD6	Putative lipoprotein OS=Peptoclostridium difficile (strain 630) GN=CD12320 PE=4 SV=1	-	1.39045e-05	9.23239e-06	2.83887e-05	1.05976e-05		-1.02977	**	-1.42157	**
CD24740	Q182G0_PEPD6	Putative DNA polymerase III, delta subunit OS=Peptoclostridium difficile (strain 630) GN=CD24740 PE=4 SV=1	-	1.4714e-05	6.99848e-06	2.09785e-05	7.80111e-06		-0.511723		-1.42716
CD07520	Q189V0_PEPD6	ABC-type transport system, aminoacid-family ATP-binding protein OS=Peptoclostridium difficile (strain 630) GN=CD07520 PE=3 SV=1	-	2.1815e-05		4.11592e-05	1.52927e-05		-0.915895	**	-1.42837	**
CD35110	Q181B1_PEPD6	Putative type IV pilus secretion protein OS=Peptoclostridium difficile (strain 630) GN=CD35110 PE=4 SV=1	-			1.18182e-06	4.38601e-07		OFF		-1.43002
CD17850	ASSY_PEPD6	Argininosuccinate synthase OS=Peptoclostridium difficile (strain 630) GN=argG PE=3 SV=1	-	0.000153902	8.49267e-05	0.000342559	0.000125147		-1.15434	**	-1.45273	**
CD01740	Q18CR1_PEPD6	Carbon monoxide dehydrogenase OS=Peptoclostridium difficile (strain 630) GN=cooS PE=4 SV=1	-	3.77664e-05	2.83682e-05	0.000156084	5.693e-05		-2.04714	**	-1.45506
CD34120	Q180R0_PEPD6	UvrABC system protein B OS=Peptoclostridium difficile (strain 630) GN=uvrB PE=3 SV=1	-	6.23712e-05	8.08091e-05	0.000210738	7.59573e-05		-1.7565		-1.47219
CD16150	Q186H0_PEPD6	ABC-type transport system, permease OS=Peptoclostridium difficile (strain 630) GN=CD16150 PE=4 SV=1	-	4.03587e-05	3.04408e-05	6.17156e-05	2.22066e-05		-0.612757		-1.47465
CD18930	Q187K6_PEPD6	Putative oligonucleotide binding regulator OS=Peptoclostridium difficile (strain 630) GN=CD18930 PE=4 SV=1	-			1.41334e-05	5.08543e-06		OFF		-1.47467	**
CD05460	Q188Z3_PEPD6	Putative membrane protein, DUF975 family OS=Peptoclostridium difficile (strain 630) GN=CD05460 PE=4 SV=1	-	1.01334e-05	7.96926e-06	1.72926e-05	6.20929e-06		-0.77103		-1.47766
CD32370	PRAC_PEPD6	Proline racemase OS=Peptoclostridium difficile (strain 630) GN=CD32370 PE=3 SV=1	-	0.00817726	0.00926074	0.01805	0.00646472		-1.14231	**	-1.48134	**
CD00220	Q18CA6_PEPD6	Elongation factor G (EF-G) OS=Peptoclostridium difficile (strain 630) GN=fusA1 PE=4 SV=2	-	7.15459e-05	0.000181509	0.000432306	0.000154341		-2.59511	**	-1.48593	**
CD21010	Q188G8_PEPD6	Xanthine dehydrogenase subunit XdhB,FAD-binding OS=Peptoclostridium difficile (strain 630) GN=xdhB PE=4 SV=1	-	4.767e-05		0.000123113	4.39003e-05		-1.36883	**	-1.48768	**
CD27040	Q183D7_PEPD6	Putative permease OS=Peptoclostridium difficile (strain 630) GN=CD27040 PE=4 SV=1	-	3.97781e-05	1.96957e-05	4.79158e-05	1.67908e-05		-0.268525		-1.51283	**
CD14080	Q18BS9_PEPD6	D-alanine--D-alanine ligase OS=Peptoclostridium difficile (strain 630) GN=ddl PE=3 SV=1	-	6.8314e-05	6.78915e-05	0.000137158	4.79796e-05		-1.00559	**	-1.51535	**
CD34330	Q180T1_PEPD6	Cobalamin biosynthesis protein CobD OS=Peptoclostridium difficile (strain 630) GN=cbiB PE=3 SV=1	-	1.04081e-05	8.17169e-06	1.31075e-05	4.45755e-06		-0.332685		-1.55607	**
CD01180	Q18CK6_PEPD6	Putative ferredoxin/flavodoxin oxidoreductase,gamma subunit OS=Peptoclostridium difficile (strain 630) GN=CD01180 PE=4 SV=1	-	0.00127202	0.00108473	0.00403404	0.00137108		-1.66511	**	-1.55692	**
CD24560	Q182E3_PEPD6	ABC-type transport system, sugar-family ATP-binding protein OS=Peptoclostridium difficile (strain 630) GN=CD24560 PE=4 SV=1	-	2.93897e-05	5.93632e-05	4.20826e-05	1.42699e-05		-0.517915		-1.56025	**
CD24730	RS20_PEPD6	30S ribosomal protein S20 OS=Peptoclostridium difficile (strain 630) GN=rpsT PE=3 SV=1	-	0.0011443	0.000883921	0.000700467	0.000228391		0.708081		-1.61681
CD33170	Q180G2_PEPD6	Formate dehydrogenase-H (Selenocysteine) OS=Peptoclostridium difficile (strain 630) GN=fdhF PE=4 SV=2	-	1.75589e-05	5.45446e-06	5.8025e-05	1.88111e-05		-1.72447	**	-1.62509	**
CD05770	Q189C2_PEPD6	Uncharacterized protein OS=Peptoclostridium difficile (strain 630) GN=CD05770 PE=4 SV=1	-	4.96037e-05		6.63215e-05	2.14986e-05		-0.41903	**	-1.62523	**
CD01790	Q18CS0_PEPD6	Glutamate dehydrogenase OS=Peptoclostridium difficile (strain 630) GN=gluD PE=3 SV=1	-	0.00572743	0.00772956	0.0232833	0.00734727		-2.02333	**	-1.66402	**
CD05610	Q189A3_PEPD6	Putative aldo/keto reductase putative ferredoxin OS=Peptoclostridium difficile (strain 630) GN=CD05610 PE=4 SV=1	-	0.000171912	8.03266e-05	0.000205132	6.3816e-05		-0.254886		-1.68456	**
CD36640	Q181R8_PEPD6	Putative aminotransferase OS=Peptoclostridium difficile (strain 630) GN=CD36640 PE=4 SV=1	-	0.00193777	0.00280156	0.0147631	0.00458354		-2.92953	**	-1.68746	**
CD32360	Q17ZY0_PEPD6	Putative membrane protein OS=Peptoclostridium difficile (strain 630) GN=CD32360 PE=4 SV=1	-	0.000532943	0.000541617	0.0013611	0.000419457		-1.35272	**	-1.69817	**
CD07280	Q189S5_PEPD6	Bifunctional carbon monoxide dehydrogenase/acetyl-CoA synthase, subunit alpha/beta OS=Peptoclostridium difficile (strain 630) GN=CD07280 PE=4 SV=1	-	3.19059e-05		4.8237e-05	1.463e-05		-0.596317	**	-1.72121	**
CD23410	Q185L4_PEPD6	Gamma-aminobutyrate metabolism dehydratase/isomerase [includes: 4-hydroxybutyryl-coa dehydratase vinylacetyl-coa-delta-isomerase] OS=Peptoclostridium difficile (strain 630) GN=abfD PE=4 SV=1	-	2.76397e-05		6.18933e-05	1.85837e-05		-1.16304		-1.73574	**
CD28280	Q183R4_PEPD6	Putative pyridoxal phosphate-dependent transferase OS=Peptoclostridium difficile (strain 630) GN=CD28280 PE=3 SV=1	-		4.90593e-05	5.81082e-05	1.72297e-05		OFF		-1.75384	**
CD33210	Q180G6_PEPD6	Uncharacterized protein OS=Peptoclostridium difficile (strain 630) GN=CD33210 PE=4 SV=2	-		1.62842e-05	1.92536e-05	5.70858e-06		OFF		-1.75393	**
CD15370	Q18C58_PEPD6	Putative glutamate synthase OS=Peptoclostridium difficile (strain 630) GN=aspB1 PE=4 SV=1	-	0.000156491	5.46542e-05	0.000453343	0.000132822		-1.53452	**	-1.77111	**
CD23790	Q181W4_PEPD6	Probable butyrate kinase OS=Peptoclostridium difficile (strain 630) GN=buk PE=3 SV=1	-	0.00033971	0.000544422	0.0016646	0.000476459		-2.2928	**	-1.80475	**
CD32400	Q17ZY7_PEPD6	Proline reductase PrdD OS=Peptoclostridium difficile (strain 630) GN=prdD PE=4 SV=2	-	0.000220342	0.000177444	0.00043984	0.000123404		-0.997233	**	-1.83358	**
CD32320	Y3232_PEPD6	UPF0597 protein CD32320 OS=Peptoclostridium difficile (strain 630) GN=CD32320 PE=3 SV=1	-	0.00565324	0.00078646	0.00388136	0.0010803		0.542514		-1.84514	**
CD01170	Q18CK7_PEPD6	Putative ferredoxin/flavodoxin oxidoreductase,beta subunit OS=Peptoclostridium difficile (strain 630) GN=CD01170 PE=4 SV=1	-	0.00297112	0.00149543	0.00906954	0.00252105		-1.61002	**	-1.847	**
CD34280	Q180S5_PEPD6	Cobalt-precorrin-6Y C(5)-methyltransferase (Cobalt-precorrin-6 methyltransferase) (Cobalt-precorrin-6Y methylase) OS=Peptoclostridium difficile (strain 630) GN=cbiE PE=4 SV=1	-	1.07105e-05	1.7395e-05	3.06624e-05	8.43313e-06		-1.51745	**	-1.86233	**
CD14840	Q18C04_PEPD6	ABC-type transport system,alkanesulfonates-family extracellular solute-binding protein OS=Peptoclostridium difficile (strain 630) GN=ssuA PE=4 SV=1	-			6.20614e-05	1.69556e-05		OFF		-1.87194
CD17680	Q186X8_PEPD6	Putative membrane protein OS=Peptoclostridium difficile (strain 630) GN=CD17680 PE=4 SV=2	-	0.000235465	0.000202275	0.000604945	0.000162082		-1.36129	**	-1.90008	**
CD13260	RIMO_PEPD6	Ribosomal protein S12 methylthiotransferase RimO OS=Peptoclostridium difficile (strain 630) GN=rimO PE=3 SV=1	-	8.84758e-05	1.54994e-05	8.40003e-05	2.21993e-05		0.0748893		-1.91988	**
CD20530	Q188C1_PEPD6	Diaminopimelate decarboxylase OS=Peptoclostridium difficile (strain 630) GN=lysA PE=3 SV=1	-	4.82231e-05	2.94727e-05	0.000109267	2.83715e-05		-1.18007	**	-1.94535	**
CD30890	Q184S5_PEPD6	PTS system, glucose-like IIBC component OS=Peptoclostridium difficile (strain 630) GN=CD30890 PE=4 SV=1	-	3.10837e-05	1.85948e-05	0.000130968	3.30356e-05		-2.07499	**	-1.98713	**
CD32390	Q17ZY2_PEPD6	Proline reductase PrdE OS=Peptoclostridium difficile (strain 630) GN=prdE PE=4 SV=1	-	6.34981e-05	5.51662e-05	0.000280092	6.74461e-05		-2.14112	**	-2.0541	**
CD01150	Q18CK1_PEPD6	Putative 4Fe-4S ferredoxin, iron-sulfur binding domain protein, delta subunit OS=Peptoclostridium difficile (strain 630) GN=CD01150 PE=4 SV=1	-	0.000328709	0.000166114	0.00118875	0.000282044		-1.85456	**	-2.07545	**
CD14900	Q18C10_PEPD6	ABC-type transport system, methionine-specific permease OS=Peptoclostridium difficile (strain 630) GN=metI PE=3 SV=1	-	4.5044e-05	1.72426e-05	3.89367e-05	9.06835e-06		0.210204		-2.10222
CD29590	Q184E9_PEPD6	V-type ATP synthase subunit K OS=Peptoclostridium difficile (strain 630) GN=atpK PE=3 SV=1	-	1.37481e-05	7.28093e-06	3.15749e-05	7.31006e-06		-1.19955	**	-2.11082	**
CD20540	Q188C0_PEPD6	Aspartokinase OS=Peptoclostridium difficile (strain 630) GN=lysC PE=3 SV=1	-	6.41147e-05	7.01665e-05	0.000195519	4.01942e-05		-1.60858	**	-2.28225	**
CD30990	Q184T6_PEPD6	Putative amidohydrolase, M20D family OS=Peptoclostridium difficile (strain 630) GN=CD30990 PE=4 SV=1	-	0.000113779	3.40774e-05	0.000132396	2.71686e-05		-0.218625		-2.28485	**
CD01160	Q18CK8_PEPD6	Putative ferredoxin/flavodoxin oxidoreductase,alpha subunit OS=Peptoclostridium difficile (strain 630) GN=CD01160 PE=4 SV=1	-	0.00247051	0.00203017	0.00970239	0.00190467		-1.97353	**	-2.3488	**
CD32820	Q180C6_PEPD6	Pyruvate formate-lyase OS=Peptoclostridium difficile (strain 630) GN=pflD PE=4 SV=1	-	8.16318e-06	6.32303e-06	6.26929e-05	1.20851e-05		-2.9411	**	-2.37507	**
CD23820	Q181W7_PEPD6	Putative pyridoxal phosphate-dependent transferase OS=Peptoclostridium difficile (strain 630) GN=CD23820 PE=4 SV=1	-	0.00014174	0.000318782	0.00100293	0.000189936		-2.8229	**	-2.40063	**
CD08830	Q18A80_PEPD6	Glycogen biosynthesis protein OS=Peptoclostridium difficile (strain 630) GN=glgD PE=4 SV=1	-			2.11363e-05	3.98638e-06		OFF		-2.40657	**
CD23800	Q181W6_PEPD6	Indole pyruvate ferredoxin/flavodoxin oxidoreductase OS=Peptoclostridium difficile (strain 630) GN=iorB PE=4 SV=1	-	8.94e-05	0.00016351	0.000956222	0.000178665		-3.419	**	-2.42009	**
CD02950	Q18D37_PEPD6	Putative iron-sulfur-binding protein OS=Peptoclostridium difficile (strain 630) GN=CD02950 PE=4 SV=1	-	2.05844e-05		0.000123051	2.23534e-05		-2.57963	**	-2.46069	**
CD10100	Q18AL1_PEPD6	N-acetylglucosamine-6-phosphate deacetylase OS=Peptoclostridium difficile (strain 630) GN=nagA PE=3 SV=2	-	2.89487e-05	4.15029e-06	3.48794e-05	5.76433e-06		-0.268874		-2.59715	**
CD23310	Q185K5_PEPD6	Mannitol-1-phosphate 5-dehydrogenase OS=Peptoclostridium difficile (strain 630) GN=mtlD PE=3 SV=1	-	5.40344e-05	3.91758e-05	0.000202926	3.30315e-05		-1.90901	**	-2.61904	**
CD34070	Q180Q5_PEPD6	Putative iron-only hydrogenase, catalytic subunit HymC-like OS=Peptoclostridium difficile (strain 630) GN=CD34070 PE=4 SV=1	-	4.50059e-05		0.000101603	1.64076e-05		-1.17476	**	-2.63052	**
CD02040	Q18CU3_PEPD6	Putative signaling protein OS=Peptoclostridium difficile (strain 630) GN=CD02040 PE=4 SV=1	-	1.41476e-05		4.51512e-05	6.84496e-06		-1.6742		-2.72165
CD34060	Q180Q4_PEPD6	Putative iron-only hydrogenase,electron-transferring subunit HymB-like OS=Peptoclostridium difficile (strain 630) GN=CD34060 PE=4 SV=1	-	3.92373e-05	9.3002e-06	0.00012805	1.87524e-05		-1.70641	**	-2.77156	**
CD17490	Q186V7_PEPD6	Putative 2-hydroxyacyl-CoA dehydratase OS=Peptoclostridium difficile (strain 630) GN=CD17490 PE=4 SV=1	-	2.51845e-05	1.2892e-05	3.61783e-05	5.13453e-06		-0.522588		-2.81682	**
CD24040	Q181Z2_PEPD6	DNA topoisomerase OS=Peptoclostridium difficile (strain 630) GN=CD24040 PE=3 SV=1	-	2.10488e-05	4.45913e-06	2.21416e-05	3.1225e-06		-0.0730236		-2.82599	**
CD23540	Q185M5_PEPD6	Glycine reductase complex component B subunits alpha and beta (Selenoprotein PB alpha/beta) OS=Peptoclostridium difficile (strain 630) GN=grdE PE=4 SV=1	-			5.12012e-05	7.16841e-06		OFF		-2.83645	**
CD07130	Q189Q5_PEPD6	Putative radical SAM domain-containing protein OS=Peptoclostridium difficile (strain 630) GN=CD07130 PE=4 SV=1	-	3.45397e-05		0.000220858	2.74306e-05		-2.67679		-3.00926
CD23810	Q181W5_PEPD6	Indolepyruvate oxidoreductase subunit IorA OS=Peptoclostridium difficile (strain 630) GN=iorA PE=4 SV=1	-	0.000279644	0.000246177	0.00335781	0.000405133		-3.58586	**	-3.05105	**
CD01530	HPDL_PEPD6	4-hydroxyphenylacetate decarboxylase large subunit OS=Peptoclostridium difficile (strain 630) GN=hpdB PE=3 SV=1	-	1.27109e-05		0.000144539	1.5101e-05		-3.50732	**	-3.25874	**
CD21520	Q185U0_PEPD6	Putative glutamyl-aminopeptidase, M42 family OS=Peptoclostridium difficile (strain 630) GN=CD21520 PE=4 SV=1	-	2.61343e-05	1.70248e-05	4.43076e-05	4.13239e-06		-0.761611		-3.42251	**
CD34050	Q180Q3_PEPD6	Putative iron-only hydrogenase,electron-transferring subunit HymA-like OS=Peptoclostridium difficile (strain 630) GN=CD34050 PE=4 SV=1	-	4.29069e-05		8.76168e-05	6.20741e-06		-1.03	**	-3.81914	**
CD04010	Q188I8_PEPD6	Alpha-subunit of electron transfer flavoprotein OS=Peptoclostridium difficile (strain 630) GN=etfA1 PE=4 SV=1	-	3.52247e-05	9.74604e-05	0.00111301	7.47019e-05		-4.98174	**	-3.89718	**
CD04000	Q188I4_PEPD6	Beta-subunit of electron transfer flavoprotein OS=Peptoclostridium difficile (strain 630) GN=etfB1 PE=4 SV=1	-	3.65274e-05	6.16058e-05	0.000828824	5.54172e-05		-4.50401	**	-3.90266	**
CD03990	Q188I5_PEPD6	Acyl-CoA dehydrogenase, short-chain specific OS=Peptoclostridium difficile (strain 630) GN=acdB PE=3 SV=1	-	4.73535e-05	0.000133761	0.00128171	6.62392e-05		-4.75846	**	-4.27424	**
CD29660	Q184F6_PEPD6	Aldehyde-alcohol dehydrogenase OS=Peptoclostridium difficile (strain 630) GN=adhE1 PE=3 SV=1	-	5.30075e-05	8.96874e-05	0.00319594	0.000139254		-5.9139	**	-4.52045	**
CD26670	Q183A0_PEPD6	PTS system, glucose-specific IIBC component OS=Peptoclostridium difficile (strain 630) GN=ptsG-BC PE=4 SV=1	-	5.43758e-05	6.0433e-05	8.11123e-05	3.19885e-06		-0.576958	**	-4.6643	**
CD03980	Q188I6_PEPD6	Subunit of oxygen-sensitive 2-hydroxyisocaproyl-CoA dehydratase C OS=Peptoclostridium difficile (strain 630) GN=hadC PE=4 SV=1	-			0.000430009	1.47826e-05		OFF		-4.8624	**
CD30390	Q184M7_PEPD6	Putative ATPase OS=Peptoclostridium difficile (strain 630) GN=CD30390 PE=4 SV=1	-	0.000399491	2.62729e-05	0.000550822	1.45089e-05		-0.463423		-5.24657
CD31160	Q184V3_PEPD6	PTS system, beta-glucoside-specific IIABC component, bglF3 OS=Peptoclostridium difficile (strain 630) GN=bglF3 PE=4 SV=1	-	1.49712e-06					ON
CD22050	Q185Z4_PEPD6	Putative membrane protein OS=Peptoclostridium difficile (strain 630) GN=CD22050 PE=4 SV=1	-	1.89062e-06					ON
CD04380	Q188M9_PEPD6	Uncharacterized protein OS=Peptoclostridium difficile (strain 630) GN=CD04380 PE=4 SV=1	-	2.35502e-06					ON
CD05240	Q188X0_PEPD6	Putative peptidase, M20 family OS=Peptoclostridium difficile (strain 630) GN=CD05240 PE=4 SV=1	-	2.44036e-06					ON
CD11670	Q18B30_PEPD6	Putative integrase/recombinase OS=Peptoclostridium difficile (strain 630) GN=CD11670 PE=4 SV=1	-	2.4674e-06					ON
CD21800	Q185W7_PEPD6	Putative DEAD-like helicase OS=Peptoclostridium difficile (strain 630) GN=CD21800 PE=4 SV=1	-	2.49093e-06					ON
CD34460	Q180U3_PEPD6	Aminopeptidase, M42 family OS=Peptoclostridium difficile (strain 630) GN=CD34460 PE=4 SV=1	-	2.77605e-06					ON
CD36160	Q181L8_PEPD6	Na(+)/H(+) antiporter OS=Peptoclostridium difficile (strain 630) GN=CD36160 PE=4 SV=1	-	2.85032e-06	5.81312e-06				ON
CD09880	Q18AI8_PEPD6	Uncharacterized protein OS=Peptoclostridium difficile (strain 630) GN=CD09880 PE=4 SV=1	-	3.73453e-06					ON
CD19640	Q187S4_PEPD6	Putative transcriptional regulator OS=Peptoclostridium difficile (strain 630) GN=CD19640 PE=4 SV=1	-	4.24881e-06					ON
CD16810	Q186N7_PEPD6	Transcriptional regulator, TetR family OS=Peptoclostridium difficile (strain 630) GN=CD16810 PE=4 SV=1	-	4.67503e-06					ON
CD09870	Q18AI9_PEPD6	Putative phosphatase/hydrolase OS=Peptoclostridium difficile (strain 630) GN=CD09870 PE=4 SV=1	-	4.98306e-06					ON
CD24840	Q182H1_PEPD6	Putative aminotransferase OS=Peptoclostridium difficile (strain 630) GN=CD24840 PE=4 SV=1	-	5.69057e-06					ON
CD25710	Q182R0_PEPD6	Two-component response regulator OS=Peptoclostridium difficile (strain 630) GN=CD25710 PE=4 SV=1	-	5.90425e-06	9.18175e-06				ON
CD21020	Q188H0_PEPD6	Putative Na(+)/H(+) antiporter OS=Peptoclostridium difficile (strain 630) GN=CD21020 PE=4 SV=2	-	5.95472e-06					ON
CD25120	Q182J6_PEPD6	PTS system, glucose-like IIA component OS=Peptoclostridium difficile (strain 630) GN=CD25120 PE=4 SV=1	-	6.18918e-06					ON
CD05700	Q189B4_PEPD6	Putative lipoprotein OS=Peptoclostridium difficile (strain 630) GN=CD05700 PE=4 SV=1	-	6.46214e-06					ON
CD19420	TRMB_PEPD6	tRNA (guanine-N(7)-)-methyltransferase OS=Peptoclostridium difficile (strain 630) GN=trmB PE=3 SV=2	-	6.84529e-06	4.44993e-06				ON
CD34540	Q180V2_PEPD6	Putative nucleotide-binding protein OS=Peptoclostridium difficile (strain 630) GN=CD34540 PE=4 SV=1	-	7.09884e-06					ON
CD25470	Q182N4_PEPD6	Uncharacterized protein OS=Peptoclostridium difficile (strain 630) GN=CD25470 PE=4 SV=1	-	7.15199e-06					ON
CD28770	Q183W5_PEPD6	ABC-type transport system, ferrichrome-specific permease OS=Peptoclostridium difficile (strain 630) GN=fhuB PE=4 SV=1	-	7.16943e-06	1.50529e-05				ON
CD26590	LGT_PEPD6	Prolipoprotein diacylglyceryl transferase OS=Peptoclostridium difficile (strain 630) GN=lgt PE=3 SV=1	-	7.34729e-06	2.48843e-06				ON
CD12030	EX7L_PEPD6	Exodeoxyribonuclease 7 large subunit OS=Peptoclostridium difficile (strain 630) GN=xseA PE=3 SV=1	-	7.58183e-06					ON
CD17970	Q187A7_PEPD6	Coenzyme A disulfide reductase (CoA-disulfide reductase) (CoADR) OS=Peptoclostridium difficile (strain 630) GN=CD17970 PE=4 SV=1	-	7.62702e-06					ON
CD06930	Q189P0_PEPD6	Transcriptional regulator, MerR family OS=Peptoclostridium difficile (strain 630) GN=CD06930 PE=4 SV=1	-	7.75091e-06					ON
CD30620	Q184P9_PEPD6	Transcriptional regulator, RpiR family OS=Peptoclostridium difficile (strain 630) GN=CD30620 PE=4 SV=1	-	7.97981e-06					ON
CD02520	Q18CZ7_PEPD6	Flagellar protein FliJ OS=Peptoclostridium difficile (strain 630) GN=fliJ PE=4 SV=2	-	7.9978e-06					ON
CD18300	Q187E0_PEPD6	Two-component response regulator KdpE OS=Peptoclostridium difficile (strain 630) GN=kdpE PE=4 SV=1	-	7.99815e-06					ON
CD06830	Q189M9_PEPD6	Transcriptional regulator, LacI family OS=Peptoclostridium difficile (strain 630) GN=CD06830 PE=4 SV=1	-	8.71349e-06					ON
CD20720	Q188D8_PEPD6	Putative transposase OS=Peptoclostridium difficile (strain 630) GN=CD20720 PE=4 SV=1	-	8.82284e-06					ON
CD20130	Q187X9_PEPD6	Transcriptional regulator, TetR family OS=Peptoclostridium difficile (strain 630) GN=hydR PE=4 SV=1	-	8.83297e-06					ON
CD27000	Q183D3_PEPD6	Transcriptional regulator, sigma-54 dependent OS=Peptoclostridium difficile (strain 630) GN=CD27000 PE=4 SV=1	-	9.09397e-06					ON
CD34500	Q180U8_PEPD6	Putative oxidoreductase with NAD(P)-binding Rossmann-fold domain OS=Peptoclostridium difficile (strain 630) GN=CD34500 PE=1 SV=1	-	9.51049e-06					ON
CD03360	Q18D75_PEPD6	ABC-type transport system, ATP-binding protein OS=Peptoclostridium difficile (strain 630) GN=CD03360 PE=3 SV=1	-	9.60804e-06					ON
CD36600	Q181R2_PEPD6	Putative membrane protein OS=Peptoclostridium difficile (strain 630) GN=CD36600 PE=4 SV=1	-	1.01365e-05	2.67706e-05				ON
CD21830	Q185X0_PEPD6	ATP-dependent RNA helicase OS=Peptoclostridium difficile (strain 630) GN=csdA PE=3 SV=1	-	1.02513e-05					ON
CD10790	Q18AT1_PEPD6	Transcriptional regulator, LysR family OS=Peptoclostridium difficile (strain 630) GN=CD10790 PE=4 SV=1	-	1.02554e-05	1.54154e-05				ON
CD09950	Q18AJ3_PEPD6	Putative D-3-phosphoglycerate dehydrogenase OS=Peptoclostridium difficile (strain 630) GN=serA PE=3 SV=1	-	1.0476e-05					ON
CD06550	Q189J6_PEPD6	Putative beta-lactamase-like protein OS=Peptoclostridium difficile (strain 630) GN=CD06550 PE=4 SV=1	-	1.1073e-05					ON
CD27250	Q183G1_PEPD6	Putative monogalactosyldiacylglycerol synthase OS=Peptoclostridium difficile (strain 630) GN=CD27250 PE=4 SV=1	-	1.12945e-05					ON
CD18270	Q187D5_PEPD6	Transcriptional regulator, MarR family OS=Peptoclostridium difficile (strain 630) GN=CD18270 PE=4 SV=1	-	1.12949e-05					ON
CD30950	Q184T2_PEPD6	6-phospho-beta-glucosidase, bglA2 OS=Peptoclostridium difficile (strain 630) GN=bglA2 PE=3 SV=1	-	1.13539e-05					ON
CD36210	Q181M2_PEPD6	Pentapeptide repeat protein OS=Peptoclostridium difficile (strain 630) GN=CD36210 PE=4 SV=1	-	1.25118e-05					ON
CD19660	Q187S7_PEPD6	Putative acyl-CoA thioesterase OS=Peptoclostridium difficile (strain 630) GN=CD19660 PE=4 SV=1	-	1.26023e-05					ON
CD31380	Q184X6_PEPD6	Transcription antiterminator, PTS operon regulator, bglG4 OS=Peptoclostridium difficile (strain 630) GN=bglG4 PE=4 SV=1	-	1.30529e-05	1.60945e-05				ON
CD30180	Q184K9_PEPD6	Oxidoreductase OS=Peptoclostridium difficile (strain 630) GN=CD30180 PE=4 SV=1	-	1.42729e-05					ON
CD05220	Q188W7_PEPD6	Putative signaling protein OS=Peptoclostridium difficile (strain 630) GN=CD05220 PE=4 SV=1	-	1.43696e-05					ON
CD13870	Q18BQ7_PEPD6	Putative allophanate hydrolase subunit 2 OS=Peptoclostridium difficile (strain 630) GN=CD13870 PE=4 SV=1	-	1.51667e-05					ON
CD14140	Q18BT3_PEPD6	Putative oxidoreductase, Fe-S subunit OS=Peptoclostridium difficile (strain 630) GN=CD14140 PE=4 SV=1	-	1.57334e-05					ON
CD20570	Q188C5_PEPD6	Uncharacterized protein OS=Peptoclostridium difficile (strain 630) GN=CD20570 PE=4 SV=1	-	1.5779e-05					ON
CD03260	Q18D68_PEPD6	ABC-type transport system, cobalt-specific permease OS=Peptoclostridium difficile (strain 630) GN=cbiQ1 PE=4 SV=1	-	1.61183e-05	1.20318e-05				ON
CD27300	Q183G4_PEPD6	Uncharacterized protein OS=Peptoclostridium difficile (strain 630) GN=CD27300 PE=4 SV=1	-	1.63343e-05					ON
CD32080	Q17ZV2_PEPD6	Transcriptional regulator, MarR family OS=Peptoclostridium difficile (strain 630) GN=CD32080 PE=4 SV=1	-	1.6774e-05	8.36178e-06				ON
CD33700	Q180L7_PEPD6	Putative recombinase Tn916-like, CTn7-Orf1 OS=Peptoclostridium difficile (strain 630) GN=CD33700 PE=1 SV=1	-	1.95576e-05					ON
CD22560	Q185D4_PEPD6	Putative PTS system, EIIC component OS=Peptoclostridium difficile (strain 630) GN=CD22560 PE=4 SV=1	-	1.97912e-05	2.75341e-05				ON
CD18850	Q187J6_PEPD6	Putative acetylesterase OS=Peptoclostridium difficile (strain 630) GN=CD18850 PE=4 SV=1	-	2.00665e-05					ON
CD19980	Q187W0_PEPD6	Transcriptional regulator, TetR family OS=Peptoclostridium difficile (strain 630) GN=CD19980 PE=4 SV=1	-	2.07042e-05					ON
CD10700	Q18AR9_PEPD6	Putative aminotransferase OS=Peptoclostridium difficile (strain 630) GN=CD10700 PE=4 SV=1	-	2.30947e-05	1.13167e-05				ON
CD36510	Q181Q3_PEPD6	Putative metallo-beta-lactamase-like hydrolase OS=Peptoclostridium difficile (strain 630) GN=CD36510 PE=4 SV=1	-	2.33798e-05	1.28485e-05				ON
CD22120	Q186A0_PEPD6	Transcriptional regulator, MarR family OS=Peptoclostridium difficile (strain 630) GN=CD22120 PE=4 SV=1	-	2.54873e-05					ON
CD29880	Q184H9_PEPD6	Two-component response regulator OS=Peptoclostridium difficile (strain 630) GN=CD29880 PE=4 SV=1	-	2.58467e-05					ON
CD30280	Q184L7_PEPD6	Putative phosphosugar isomerase OS=Peptoclostridium difficile (strain 630) GN=CD30280 PE=4 SV=1	-	2.62145e-05	2.58477e-05				ON
CD30960	Q184T3_PEPD6	6-phospho-beta-glucosidase, bglA3 OS=Peptoclostridium difficile (strain 630) GN=bglA3 PE=3 SV=1	-	3.10935e-05	1.49318e-05				ON
CD13990	Q18BR8_PEPD6	Putative muramoyltetrapeptide carboxypeptidase,S66 family OS=Peptoclostridium difficile (strain 630) GN=CD13990 PE=4 SV=1	-	3.13607e-05					ON
CD20120	Q187Y0_PEPD6	Putative hydrolase OS=Peptoclostridium difficile (strain 630) GN=hydD PE=4 SV=1	-	3.59531e-05					ON
CD20210	Q187Z1_PEPD6	Uncharacterized protein OS=Peptoclostridium difficile (strain 630) GN=CD20210 PE=4 SV=1	-	3.80729e-05	1.46375e-05				ON
CD06760	Q189M0_PEPD6	Extracytoplasmic function (ECF) anti-sigma factor rsiT OS=Peptoclostridium difficile (strain 630) GN=rsiT PE=4 SV=1	-	4.31199e-05					ON
CD08200	Q18A17_PEPD6	Two-component response regulator OS=Peptoclostridium difficile (strain 630) GN=CD08200 PE=4 SV=1	-	4.54676e-05					ON
CD32730	Q180B8_PEPD6	Ferrous iron transport protein OS=Peptoclostridium difficile (strain 630) GN=feoA4 PE=4 SV=1	-	5.51549e-05					ON
CD00240	Q18CA7_PEPD6	Activator of protein kinase McsB OS=Peptoclostridium difficile (strain 630) GN=mcsA PE=4 SV=1	-	6.05893e-05	3.08634e-05				ON
CD00280	DISA_PEPD6	DNA integrity scanning protein DisA OS=Peptoclostridium difficile (strain 630) GN=disA PE=3 SV=1	-	6.27596e-05	1.0203e-05				ON
CD31180	Q184V5_PEPD6	Uncharacterized protein OS=Peptoclostridium difficile (strain 630) GN=CD31180 PE=4 SV=1	-	7.45253e-05	4.86264e-05				ON
CD21050	Q188H3_PEPD6	ABC-type transport system, multidrug-family ATP-binding protein OS=Peptoclostridium difficile (strain 630) GN=CD21050 PE=3 SV=1	-	8.06275e-05	5.17246e-05				ON
CD32340	Q17ZX9_PEPD6	Uncharacterized protein OS=Peptoclostridium difficile (strain 630) GN=CD32340 PE=4 SV=1	-	8.12225e-05					ON
CD10890	Q18AU3_PEPD6	Two-component response regulator VirR-like OS=Peptoclostridium difficile (strain 630) GN=rgbR PE=4 SV=1	-	0.000169228	0.000178359				ON
CD14850	Q18C06_PEPD6	Uncharacterized protein OS=Peptoclostridium difficile (strain 630) GN=CD14850 PE=4 SV=1	-	0.000187364	1.33213e-05				ON
CD11190	Q18AX9_PEPD6	Putative lipoprotein OS=Peptoclostridium difficile (strain 630) GN=CD11190 PE=4 SV=1	-	0.000247929	0.000169284				ON
CD08770	Q18A70_PEPD6	ABC-type transport system, sugar-family ATP-binding protein OS=Peptoclostridium difficile (strain 630) GN=CD08770 PE=4 SV=1	-	0.000960905					ON
CD20070	Q187X3_PEPD6	Ribosomal RNA adenine N-6-methyltransferase (Erythromycin resistance protein) OS=Peptoclostridium difficile (strain 630) GN=ermB PE=4 SV=1	-	0.00121595	0.00146147				ON
CD05600	END4_PEPD6	Probable endonuclease 4 OS=Peptoclostridium difficile (strain 630) GN=nfo PE=3 SV=1	-		1.79488e-05
CD33320	Q180H8_PEPD6	Transcriptional regulator, TetR family Tn916-like, CTn6-Orf8 OS=Peptoclostridium difficile (strain 630) GN=CD33320 PE=4 SV=2	-		1.98788e-05
CD33740	Q180M1_PEPD6	Putative conjugative transposon protein Tn916-like, CTn7-Orf8 OS=Peptoclostridium difficile (strain 630) GN=CD33740 PE=4 SV=1	-		3.98254e-05
CD34320	Q180S9_PEPD6	Threonine-phosphate decarboxylase (L-threonine-O-3-phosphate decarboxylase), CobD/CbiB family OS=Peptoclostridium difficile (strain 630) GN=cobD PE=4 SV=1	-		7.26954e-06
CD34530	Q180V0_PEPD6	N-acetylglucosamine-6-phosphate deacetylase OS=Peptoclostridium difficile (strain 630) GN=CD34530 PE=3 SV=1	-		1.26964e-05
CD34860	Q180Y3_PEPD6	Putative membrane protein OS=Peptoclostridium difficile (strain 630) GN=CD34860 PE=4 SV=1	-		7.22048e-06
CD36140	Q181L6_PEPD6	Uncharacterized protein OS=Peptoclostridium difficile (strain 630) GN=CD36140 PE=4 SV=1	-		1.99899e-05
CD31870	Q181V0_PEPD6	Putative regulatory endoribonuclease OS=Peptoclostridium difficile (strain 630) GN=tdcF PE=4 SV=1	-		4.47855e-06
CD26560	Q182Z0_PEPD6	Stage V sporulation protein D (Sporulation-specific penicillin-binding protein) OS=Peptoclostridium difficile (strain 630) GN=spoVD PE=4 SV=1	-		3.57444e-06
CD29520	Q184E0_PEPD6	Putative phage site-specific integrase OS=Peptoclostridium difficile (strain 630) GN=CD29520 PE=4 SV=1	-		8.79625e-06
CD30270	Q184L4_PEPD6	PTS system, glucose-like IIA component OS=Peptoclostridium difficile (strain 630) GN=CD30270 PE=4 SV=1	-		3.69799e-05
CD31550	Q184Z4_PEPD6	Putative Fic/Doc-related protein OS=Peptoclostridium difficile (strain 630) GN=CD31550 PE=4 SV=2	-		2.16879e-05
CD23190	Q185J4_PEPD6	Putative ribulose-phosphate 3-epimerase OS=Peptoclostridium difficile (strain 630) GN=rpe PE=4 SV=1	-		1.98839e-05
CD15950	Q186E9_PEPD6	Serine acetyltransferase OS=Peptoclostridium difficile (strain 630) GN=cysE PE=3 SV=2	-		4.24336e-05
CD16470	Q186K1_PEPD6	ABC-type transport system, iron-family permease OS=Peptoclostridium difficile (strain 630) GN=CD16470 PE=4 SV=1	-		2.68788e-05
CD16570	Q186L1_PEPD6	Aminomethyltransferase OS=Peptoclostridium difficile (strain 630) GN=gcvTPA PE=3 SV=1	-		6.40489e-06
CD19390	Q187Q0_PEPD6	Acetyl-CoA carboxylase subunit OS=Peptoclostridium difficile (strain 630) GN=accB PE=4 SV=1	-		0.000226707
CD19801	Q187U2_PEPD6	Uncharacterized protein OS=Peptoclostridium difficile (strain 630) GN=CD19801 PE=4 SV=1	-		0.000402163
CD20460	Q188B4_PEPD6	Uncharacterized protein OS=Peptoclostridium difficile (strain 630) GN=CD20460 PE=4 SV=1	-		2.21429e-05
CD20640	Q188D1_PEPD6	Uncharacterized protein OS=Peptoclostridium difficile (strain 630) GN=CD20640 PE=4 SV=1	-		6.24109e-06
CD05730	Q189B6_PEPD6	Putative membrane protein OS=Peptoclostridium difficile (strain 630) GN=CD05730 PE=4 SV=1	-		1.36322e-05
CD05900	Q189D3_PEPD6	Uncharacterized protein OS=Peptoclostridium difficile (strain 630) GN=CD05900 PE=4 SV=1	-		1.08195e-05
CD06290	Q189H6_PEPD6	Transcriptional regulator, Crp family OS=Peptoclostridium difficile (strain 630) GN=CD06290 PE=4 SV=1	-		5.81696e-06
CD12110	Q18B70_PEPD6	Putative N-acetyltransferase OS=Peptoclostridium difficile (strain 630) GN=CD12110 PE=4 SV=1	-		1.29914e-05
CD12290	Q18B92_PEPD6	Putative peptidoglycan glycosyltransferase OS=Peptoclostridium difficile (strain 630) GN=CD12290 PE=4 SV=1	-		1.87342e-05
CD13420	Q18BL1_PEPD6	Putative ribonuclease OS=Peptoclostridium difficile (strain 630) GN=CD13420 PE=4 SV=2	-		1.85912e-05
CD13780	Q18BP8_PEPD6	Transcriptional regulator, Phage-type OS=Peptoclostridium difficile (strain 630) GN=CD13780 PE=4 SV=1	-		3.6532e-06
CD01560	Q18CP7_PEPD6	Putative membrane-membrane-associated CAAX amino terminal protease OS=Peptoclostridium difficile (strain 630) GN=CD01560 PE=4 SV=1	-		2.55517e-06
CD01730	Q18CR2_PEPD6	Putative lipoprotein OS=Peptoclostridium difficile (strain 630) GN=CD01730 PE=4 SV=1	-		8.87797e-06
CD03220	Q18D65_PEPD6	Putative ATPase OS=Peptoclostridium difficile (strain 630) GN=CD03220 PE=4 SV=1	-		7.47309e-06
CD08160	X1W3M2_PEPD6	PTS system, beta-glucoside-specific IIABC component, bglF1 OS=Peptoclostridium difficile (strain 630) GN=bglF1 PE=4 SV=1	-		2.04834e-06
